# Supplementary material
Source: publisher figshare collection journal article supplement (https://acs.figshare.com/ndownloader/files/12149699)
Supplement: Supplementary file 1 [file 12149699]

_publ_contact_authors
;
      'Jean-Marie Lehn and Rodolphe Cl�rac'
;
_publ_contact_author_phone        '(33)5 56 84 56 27'
_publ_contact_author_fax          '(33)5 56 84 56 00'
_publ_contact_author_email        lehn@unistra.fr

#===END

# 3. TITLE AND AUTHOR LIST

loop_
 _publ_author_name
 _publ_author_address

      'S�bastien Dhers'
;       a) Laboratoire de Chimie Supramol�culaire, ISIS, 
	Universit� de Strasbourg, 8 All�e Gaspard Monge, 67000 Strasbourg, France.
;
      'Abhishake Mondal'
;       b) CNRS, CRPP, UMR 5031, F-33600 Pessac, France
	c) Univ. Bordeaux, CRPP, UMR 5031, F-33600 Pessac, France
	d) Solid State and Structural Chemistry Unit, Indian Institute of Science, 
	C.V. Raman Road, Bangalore-560012, India
;
      'David Aguila'
;       b) CNRS, CRPP, UMR 5031, F-33600 Pessac, France
	c) Univ. Bordeaux, CRPP, UMR 5031, F-33600 Pessac, France
;
      'Juan Ram�rez'
;       a) Laboratoire de Chimie Supramol�culaire, ISIS, 
	Universit� de Strasbourg, 8 All�e Gaspard Monge, 67000 Strasbourg, France.
;
      'Sergi Vela'
;       e)  Laboratoire de Chimie Quantique, UMR 7177 CNRS-Universit� de Strasbourg, 
	1 rue Blaise Pascal, 67008 Strasbourg, France
;
      'Pierre Dechambenoit'
;       b) CNRS, CRPP, UMR 5031, F-33600 Pessac, France
	c) Univ. Bordeaux, CRPP, UMR 5031, F-33600 Pessac, France
;
      'Matthieu Rouzi�res'
;       b) CNRS, CRPP, UMR 5031, F-33600 Pessac, France
	c) Univ. Bordeaux, CRPP, UMR 5031, F-33600 Pessac, France
;
      'Jonathan Nitschke'
;       a) Laboratoire de Chimie Supramol�culaire, ISIS, 
	Universit� de Strasbourg, 8 All�e Gaspard Monge, 67000 Strasbourg, France.
	f) Department of Chemistry, University of Cambridge, CB2 1EW, UK
;
      'Rodolphe Cl�rac'
;       b) CNRS, CRPP, UMR 5031, F-33600 Pessac, France
	c) Univ. Bordeaux, CRPP, UMR 5031, F-33600 Pessac, France
;
      'Jean-Marie Lehn'
;       a) Laboratoire de Chimie Supramol�culaire, ISIS, 
	Universit� de Strasbourg, 8 All�e Gaspard Monge, 67000 Strasbourg, France.
; 
data_shelx
 
_audit_creation_method            'SHELXL-2014/7'
_shelx_SHELXL_version_number      '2014/7'
_chemical_name_systematic         ?
_chemical_name_common             ?
_chemical_melting_point           ?
_chemical_formula_moiety          'C88 H68 N32 Zn4, 4(B F4), 8(H2 O)'
_chemical_formula_sum
 'C88 H84 B4 F16 N32 O8 Zn4' 
_chemical_formula_weight          2326.59

loop_
 _atom_type_symbol
 _atom_type_description
 _atom_type_scat_dispersion_real
 _atom_type_scat_dispersion_imag
 _atom_type_scat_source
 'C'  'C'   0.0033   0.0016
 'International Tables Vol C Tables 4.2.6.8 and 6.1.1.4'
 'H'  'H'   0.0000   0.0000
 'International Tables Vol C Tables 4.2.6.8 and 6.1.1.4'
 'B'  'B'   0.0013   0.0007
 'International Tables Vol C Tables 4.2.6.8 and 6.1.1.4'
 'N'  'N'   0.0061   0.0033
 'International Tables Vol C Tables 4.2.6.8 and 6.1.1.4'
 'F'  'F'   0.0171   0.0103
 'International Tables Vol C Tables 4.2.6.8 and 6.1.1.4'
 'Zn'  'Zn'   0.2839   1.4301
 'International Tables Vol C Tables 4.2.6.8 and 6.1.1.4'
 'O'  'O'   0.0106   0.0060
 'International Tables Vol C Tables 4.2.6.8 and 6.1.1.4'
 
_space_group_crystal_system       tetragonal
_space_group_IT_number            130
_space_group_name_H-M_alt         'P 4/n c c'
_space_group_name_Hall            '-P 4a 2ac'
 
_shelx_space_group_comment
;
The symmetry employed for this shelxl refinement is uniquely defined
by the following loop, which should always be used as a source of
symmetry information in preference to the above space-group names.
They are only intended as comments.
;
 
loop_
 _space_group_symop_operation_xyz
 'x, y, z'
 '-x+1/2, -y+1/2, z'
 '-y+1/2, x, z'
 'y, -x+1/2, z'
 '-x, y+1/2, -z+1/2'
 'x+1/2, -y, -z+1/2'
 'y+1/2, x+1/2, -z+1/2'
 '-y, -x, -z+1/2'
 '-x, -y, -z'
 'x-1/2, y-1/2, -z'
 'y-1/2, -x, -z'
 '-y, x-1/2, -z'
 'x, -y-1/2, z-1/2'
 '-x-1/2, y, z-1/2'
 '-y-1/2, -x-1/2, z-1/2'
 'y, x, z-1/2'
 
_cell_length_a                    21.6393(13)
_cell_length_b                    21.6393(13)
_cell_length_c                    21.1688(15)
_cell_angle_alpha                 90
_cell_angle_beta                  90
_cell_angle_gamma                 90
_cell_volume                      9912.5(14)
_cell_formula_units_Z             4
_cell_measurement_temperature     120(2)
_cell_measurement_reflns_used     9306
_cell_measurement_theta_min       2.31
_cell_measurement_theta_max       26.01
 
_exptl_crystal_description        block
_exptl_crystal_colour             red
_exptl_crystal_density_meas       'not measured'
_exptl_crystal_density_method     ?
_exptl_crystal_density_diffrn     1.559          
_exptl_crystal_F_000              4736
_exptl_transmission_factor_min    ?
_exptl_transmission_factor_max    ?
_exptl_crystal_size_max           0.300
_exptl_crystal_size_mid           0.140
_exptl_crystal_size_min           0.100
_exptl_absorpt_coefficient_mu     1.059
_shelx_estimated_absorpt_T_min    0.742
_shelx_estimated_absorpt_T_max    0.901
_exptl_absorpt_correction_type    multi-scan
_exptl_absorpt_correction_T_min   0.6773
_exptl_absorpt_correction_T_max   0.7453
_exptl_absorpt_process_details    SADABS
_exptl_absorpt_special_details    ?
_diffrn_ambient_temperature       120(2)
_diffrn_radiation_wavelength      0.71073
_diffrn_radiation_type            MoK\a
_diffrn_source                    'Incoatec microfocus sealed tube'
_diffrn_measurement_device_type   'Bruker APEX-II Quasar'
_diffrn_measurement_method        'phi and omega scans'
_diffrn_detector_area_resol_mean  ?
_diffrn_reflns_number             379061
_diffrn_reflns_av_unetI/netI      0.0109
_diffrn_reflns_av_R_equivalents   0.0554
_diffrn_reflns_limit_h_min        -26
_diffrn_reflns_limit_h_max        26
_diffrn_reflns_limit_k_min        -26
_diffrn_reflns_limit_k_max        26
_diffrn_reflns_limit_l_min        -26
_diffrn_reflns_limit_l_max        26
_diffrn_reflns_theta_min          1.882
_diffrn_reflns_theta_max          26.050
_diffrn_reflns_theta_full         25.242
_diffrn_measured_fraction_theta_max   1.000
_diffrn_measured_fraction_theta_full  1.000
_diffrn_reflns_Laue_measured_fraction_max    1.000
_diffrn_reflns_Laue_measured_fraction_full   1.000
_diffrn_reflns_point_group_measured_fraction_max   1.000
_diffrn_reflns_point_group_measured_fraction_full  1.000
_reflns_number_total              4911
_reflns_number_gt                 4787
_reflns_threshold_expression      'I > 2\s(I)'
_reflns_Friedel_coverage          0.000
_reflns_Friedel_fraction_max      .
_reflns_Friedel_fraction_full     .
 
_reflns_special_details
;
 Reflections were merged by SHELXL according to the crystal
 class for the calculation of statistics and refinement.
 
 _reflns_Friedel_fraction is defined as the number of unique
 Friedel pairs measured divided by the number that would be
 possible theoretically, ignoring centric projections and
 systematic absences.
;
 
_computing_data_collection        'Bruker APEX2'
_computing_cell_refinement        'Bruker SAINT'
_computing_data_reduction         'Bruker SAINT'
_computing_structure_solution     'SHELXS-2013 (Sheldrick, 2013)'
_computing_structure_refinement   'SHELXL-2014/7 (Sheldrick, 2014)'
_computing_molecular_graphics     ?
_computing_publication_material   ?
_refine_special_details           
;
All non-hydrogens were refined anisotropically. Hydrogen atoms were placed 
at calculated positions on their carrier atom and refined using a riding model,
except for H3N and those on the water molecule which were found on the difference
Fourier map and refined using DFIX contraints (and DANG for those on H2O).
Additional water molecules are also present but disordered disordered on several 
positions. Those were treated as a diffuse contribution to the overall scattering 
without specific atom positions using the SQUEEZE procedure in PLATON.
loop_
  _platon_squeeze_void_nr
  _platon_squeeze_void_average_x
  _platon_squeeze_void_average_y
  _platon_squeeze_void_average_z
  _platon_squeeze_void_volume
  _platon_squeeze_void_count_electrons
  _platon_squeeze_void_content
   1  0.250  0.250  0.246       246        68 ' '
   2  0.750  0.750  0.254       245        68 ' '
   3  0.250  0.250  0.746       246        68 ' '
   4  0.750  0.750  0.754       245        68 ' '
_platon_squeeze_void_probe_radius                  1.20
;
_vrf_PLAT601_shelx
;
PROBLEM: Structure Contains Solvent Accessible VOIDS of .        252 Ang3 
RESPONSE: This void space is filled up by disordered water molecules which were removed from the refinement using 
the SQUEEZE procedure in PLATON.
;
_vrf_PLAT043_shelx
;
PROBLEM: Calculated and Reported Mol. Weight Differ by ..      71.98 Check 
RESPONSE: The given formula takes into account four additional water molecules par tetranuclear complex, 
which were removed from the refinement using the SQUEEZE procedure in PLATON.
;
_refine_ls_structure_factor_coef  Fsqd
_refine_ls_matrix_type            full
_refine_ls_weighting_scheme       calc
_refine_ls_weighting_details
'w=1/[\s^2^(Fo^2^)+(0.0649P)^2^+34.2524P] where P=(Fo^2^+2Fc^2^)/3'
_atom_sites_solution_primary      ?
_atom_sites_solution_secondary    ?
_atom_sites_solution_hydrogens    mixed
_refine_ls_hydrogen_treatment     mixed
_refine_ls_extinction_method      none
_refine_ls_extinction_coef        .
_refine_ls_number_reflns          4911
_refine_ls_number_parameters      340
_refine_ls_number_restraints      3
_refine_ls_R_factor_all           0.0623
_refine_ls_R_factor_gt            0.0604
_refine_ls_wR_factor_ref          0.1589
_refine_ls_wR_factor_gt           0.1574
_refine_ls_goodness_of_fit_ref    1.138
_refine_ls_restrained_S_all       1.138
_refine_ls_shift/su_max           0.001
_refine_ls_shift/su_mean          0.000
 
loop_
 _atom_site_label
 _atom_site_type_symbol
 _atom_site_fract_x
 _atom_site_fract_y
 _atom_site_fract_z
 _atom_site_U_iso_or_equiv
 _atom_site_adp_type
 _atom_site_occupancy
 _atom_site_site_symmetry_order  
 _atom_site_calc_flag
 _atom_site_refinement_flags_posn
 _atom_site_refinement_flags_adp
 _atom_site_refinement_flags_occupancy
 _atom_site_disorder_assembly
 _atom_site_disorder_group
Zn1 Zn 0.54645(2) 0.28736(2) 0.47444(2) 0.02104(16) Uani 1 1 d . . . . .
N5 N 0.70451(13) 0.39816(13) 0.54693(13) 0.0200(6) Uani 1 1 d . . . . .
N4 N 0.61229(14) 0.34032(14) 0.52874(13) 0.0210(6) Uani 1 1 d . . . . .
N7 N 0.78342(14) 0.44820(14) 0.62340(15) 0.0230(6) Uani 1 1 d . . . . .
N3 N 0.54917(15) 0.31027(17) 0.61285(15) 0.0293(7) Uani 1 1 d . . . . .
H3N H 0.5388 0.3090 0.6530 0.035 Uiso 1 1 calc R U . . .
N6 N 0.73324(14) 0.42333(15) 0.65283(14) 0.0242(6) Uani 1 1 d . . . . .
N8 N 0.87105(14) 0.50372(14) 0.55723(14) 0.0254(7) Uani 1 1 d . . . . .
N2 N 0.51499(14) 0.28188(14) 0.56762(14) 0.0250(7) Uani 1 1 d . . . . .
N1 N 0.45793(14) 0.23205(15) 0.47124(15) 0.0275(7) Uani 1 1 d . . . . .
C7 C 0.60060(16) 0.34084(17) 0.59239(17) 0.0231(7) Uani 1 1 d . . . . .
C9 C 0.69317(16) 0.39739(16) 0.61131(16) 0.0214(7) Uani 1 1 d . . . . .
C11 C 0.67308(16) 0.37311(17) 0.44003(16) 0.0229(7) Uani 1 1 d . . . . .
C10 C 0.66303(16) 0.37026(15) 0.50978(16) 0.0200(7) Uani 1 1 d . . . . .
C17 C 0.82467(18) 0.47648(18) 0.65568(18) 0.0280(8) Uani 1 1 d . . . . .
H17 H 0.8220 0.4793 0.7004 0.034 Uiso 1 1 calc R U . . .
O1 O 0.5212(2) 0.3104(2) 0.73759(16) 0.0707(13) Uani 1 1 d D . . . .
C8 C 0.63955(17) 0.36934(17) 0.63462(16) 0.0244(7) Uani 1 1 d . . . . .
H8 H 0.6303 0.3700 0.6785 0.029 Uiso 1 1 calc R U . . .
C5 C 0.43301(18) 0.22286(18) 0.5288(2) 0.0304(9) Uani 1 1 d . . . . .
C16 C 0.7075(2) 0.3284(2) 0.40939(19) 0.0350(9) Uani 1 1 d . . . . .
H16 H 0.7248 0.2951 0.4327 0.042 Uiso 1 1 calc R U . . .
C12 C 0.64723(18) 0.42093(19) 0.40499(18) 0.0296(8) Uani 1 1 d . . . . .
H12 H 0.6231 0.4516 0.4255 0.036 Uiso 1 1 calc R U . . .
C6 C 0.46676(17) 0.2502(2) 0.58172(18) 0.0320(8) Uani 1 1 d . . . . .
H6 H 0.4537 0.2447 0.6242 0.038 Uiso 1 1 calc R U . . .
C18 C 0.87596(18) 0.50422(17) 0.62114(18) 0.0269(8) Uani 1 1 d . . . . .
C13 C 0.6565(2) 0.4242(2) 0.34018(19) 0.0399(10) Uani 1 1 d . . . . .
H13 H 0.6384 0.4567 0.3163 0.048 Uiso 1 1 calc R U . . .
C22 C 0.91641(19) 0.52912(19) 0.5227(2) 0.0325(9) Uani 1 1 d . . . . .
H22 H 0.9128 0.5289 0.4780 0.039 Uiso 1 1 calc R U . . .
C14 C 0.6923(2) 0.3798(2) 0.31046(19) 0.0421(11) Uani 1 1 d . . . . .
H14 H 0.7000 0.3826 0.2664 0.050 Uiso 1 1 calc R U . . .
C15 C 0.7167(2) 0.3320(2) 0.3447(2) 0.0438(11) Uani 1 1 d . . . . .
H15 H 0.7402 0.3010 0.3239 0.053 Uiso 1 1 calc R U . . .
C19 C 0.92675(19) 0.5302(2) 0.6516(2) 0.0372(10) Uani 1 1 d . . . . .
H19 H 0.9292 0.5303 0.6964 0.045 Uiso 1 1 calc R U . . .
F4 F 0.3589(3) 0.4280(3) 0.6997(2) 0.1201(18) Uani 1 1 d . . . . .
C1 C 0.42683(19) 0.21095(19) 0.4206(2) 0.0357(9) Uani 1 1 d . . . . .
H1 H 0.4444 0.2169 0.3799 0.043 Uiso 1 1 calc R U . . .
C21 C 0.9681(2) 0.5555(2) 0.5498(2) 0.0391(10) Uani 1 1 d . . . . .
H21 H 0.9995 0.5732 0.5242 0.047 Uiso 1 1 calc R U . . .
C4 C 0.3774(2) 0.1910(2) 0.5369(2) 0.0410(11) Uani 1 1 d . . . . .
H4 H 0.3616 0.1832 0.5780 0.049 Uiso 1 1 calc R U . . .
C20 C 0.9734(2) 0.5557(2) 0.6158(2) 0.0451(11) Uani 1 1 d . . . . .
H20 H 1.0087 0.5732 0.6356 0.054 Uiso 1 1 calc R U . . .
F1 F 0.4240(3) 0.4540(3) 0.6158(2) 0.1193(18) Uani 1 1 d . . . . .
C2 C 0.3707(2) 0.1811(2) 0.4250(2) 0.0445(11) Uani 1 1 d . . . . .
H2 H 0.3493 0.1679 0.3881 0.053 Uiso 1 1 calc R U . . .
C3 C 0.3463(2) 0.1711(2) 0.4843(2) 0.0467(12) Uani 1 1 d . . . . .
H3 H 0.3079 0.1503 0.4887 0.056 Uiso 1 1 calc R U . . .
F3 F 0.4668(3) 0.4224(3) 0.7078(2) 0.1158(17) Uani 1 1 d . . . . .
F2 F 0.4138(3) 0.3554(2) 0.6477(3) 0.122(2) Uani 1 1 d . . . . .
B1 B 0.4173(4) 0.4136(4) 0.6684(4) 0.073(2) Uani 1 1 d . . . . .
H2W H 0.488(2) 0.338(3) 0.749(3) 0.087 Uiso 1 1 d D U . . .
H1W H 0.551(2) 0.307(3) 0.771(2) 0.087 Uiso 1 1 d D U . . .
 
loop_
 _atom_site_aniso_label
 _atom_site_aniso_U_11
 _atom_site_aniso_U_22
 _atom_site_aniso_U_33
 _atom_site_aniso_U_23
 _atom_site_aniso_U_13
 _atom_site_aniso_U_12
Zn1 0.0214(2) 0.0243(2) 0.0174(2) 0.00143(15) -0.00194(15) -0.00135(15)
N5 0.0204(14) 0.0215(15) 0.0183(14) -0.0015(11) -0.0004(11) -0.0010(11)
N4 0.0234(15) 0.0254(15) 0.0141(14) -0.0002(11) -0.0012(11) -0.0011(12)
N7 0.0249(15) 0.0248(15) 0.0194(15) -0.0023(12) -0.0016(12) 0.0021(12)
N3 0.0259(16) 0.043(2) 0.0188(15) 0.0054(14) 0.0011(12) -0.0022(14)
N6 0.0254(16) 0.0306(16) 0.0165(14) -0.0032(12) -0.0005(12) -0.0022(13)
N8 0.0269(16) 0.0237(15) 0.0256(16) -0.0041(12) 0.0007(13) 0.0022(12)
N2 0.0220(15) 0.0298(16) 0.0231(15) 0.0063(12) -0.0020(12) 0.0022(12)
N1 0.0223(16) 0.0244(16) 0.0359(18) 0.0025(13) -0.0035(13) 0.0002(12)
C7 0.0213(17) 0.0279(18) 0.0200(17) 0.0031(14) -0.0003(14) 0.0031(14)
C9 0.0261(18) 0.0224(17) 0.0158(16) -0.0010(13) 0.0003(13) 0.0034(14)
C11 0.0225(17) 0.0270(18) 0.0192(17) -0.0027(14) -0.0014(13) -0.0096(14)
C10 0.0227(17) 0.0183(16) 0.0191(17) -0.0009(13) -0.0024(13) 0.0031(13)
C17 0.0286(19) 0.034(2) 0.0210(18) -0.0046(15) -0.0046(15) -0.0003(16)
O1 0.076(3) 0.112(4) 0.0238(17) 0.0152(19) -0.0001(17) 0.043(3)
C8 0.0281(18) 0.0296(19) 0.0154(16) -0.0014(14) 0.0012(14) 0.0016(15)
C5 0.0234(19) 0.0270(19) 0.041(2) 0.0106(16) -0.0023(16) 0.0022(15)
C16 0.046(2) 0.030(2) 0.028(2) -0.0057(16) 0.0078(18) -0.0027(18)
C12 0.031(2) 0.035(2) 0.0230(19) 0.0025(16) -0.0028(15) -0.0008(16)
C6 0.0244(18) 0.041(2) 0.0310(19) 0.0132(18) 0.0045(15) 0.0009(17)
C18 0.0288(19) 0.0277(19) 0.0242(18) -0.0042(15) -0.0036(15) -0.0007(15)
C13 0.044(2) 0.054(3) 0.022(2) 0.0075(19) -0.0082(18) -0.008(2)
C22 0.033(2) 0.030(2) 0.034(2) -0.0037(16) 0.0047(17) 0.0000(16)
C14 0.049(3) 0.059(3) 0.0181(18) -0.0075(19) 0.0035(18) -0.026(2)
C15 0.055(3) 0.043(3) 0.032(2) -0.019(2) 0.015(2) -0.015(2)
C19 0.034(2) 0.043(2) 0.035(2) -0.0082(18) -0.0077(18) -0.0075(18)
F4 0.138(4) 0.123(4) 0.099(3) -0.002(3) 0.000(3) 0.069(3)
C1 0.031(2) 0.034(2) 0.042(2) -0.0030(18) -0.0071(18) -0.0030(17)
C21 0.030(2) 0.040(2) 0.047(3) -0.003(2) 0.0094(19) -0.0056(18)
C4 0.030(2) 0.040(2) 0.053(3) 0.019(2) 0.002(2) -0.0056(18)
C20 0.031(2) 0.050(3) 0.055(3) -0.010(2) -0.003(2) -0.011(2)
F1 0.130(4) 0.132(4) 0.095(3) -0.009(3) 0.007(3) 0.030(3)
C2 0.036(2) 0.040(2) 0.058(3) -0.004(2) -0.008(2) -0.0083(19)
C3 0.033(2) 0.032(2) 0.075(3) 0.006(2) -0.006(2) -0.0102(18)
F3 0.130(4) 0.124(4) 0.093(3) -0.031(3) -0.022(3) 0.025(3)
F2 0.141(4) 0.104(4) 0.121(4) -0.027(3) -0.057(3) 0.052(3)
B1 0.079(5) 0.078(5) 0.062(4) -0.013(4) -0.025(4) 0.029(4)
 
_geom_special_details
;
 All esds (except the esd in the dihedral angle between two l.s. planes)
 are estimated using the full covariance matrix.  The cell esds are taken
 into account individually in the estimation of esds in distances, angles
 and torsion angles; correlations between esds in cell parameters are only
 used when they are defined by crystal symmetry.  An approximate (isotropic)
 treatment of cell esds is used for estimating esds involving l.s. planes.
;
 
loop_
 _geom_bond_atom_site_label_1
 _geom_bond_atom_site_label_2
 _geom_bond_distance
 _geom_bond_site_symmetry_2
 _geom_bond_publ_flag
Zn1 N7 2.076(3) 12_656 ?
Zn1 N2 2.090(3) . ?
Zn1 N4 2.160(3) . ?
Zn1 N5 2.203(3) 12_656 ?
Zn1 N8 2.215(3) 12_656 ?
Zn1 N1 2.260(3) . ?
N5 C10 1.337(4) . ?
N5 C9 1.385(4) . ?
N5 Zn1 2.204(3) 11_666 ?
N4 C10 1.337(5) . ?
N4 C7 1.371(4) . ?
N7 C17 1.280(5) . ?
N7 N6 1.363(4) . ?
N7 Zn1 2.076(3) 11_666 ?
N3 N2 1.357(5) . ?
N3 C7 1.365(5) . ?
N3 H3N 0.8800 . ?
N6 C9 1.356(5) . ?
N8 C22 1.341(5) . ?
N8 C18 1.357(5) . ?
N8 Zn1 2.215(3) 11_666 ?
N2 C6 1.284(5) . ?
N1 C1 1.346(5) . ?
N1 C5 1.346(5) . ?
C7 C8 1.375(5) . ?
C9 C8 1.399(5) . ?
C11 C16 1.382(6) . ?
C11 C12 1.391(5) . ?
C11 C10 1.494(5) . ?
C17 C18 1.458(5) . ?
C17 H17 0.9500 . ?
O1 H2W 0.963(19) . ?
O1 H1W 0.96(2) . ?
C8 H8 0.9500 . ?
C5 C4 1.397(6) . ?
C5 C6 1.463(6) . ?
C16 C15 1.386(6) . ?
C16 H16 0.9500 . ?
C12 C13 1.388(5) . ?
C12 H12 0.9500 . ?
C6 H6 0.9500 . ?
C18 C19 1.393(5) . ?
C13 C14 1.384(7) . ?
C13 H13 0.9500 . ?
C22 C21 1.380(6) . ?
C22 H22 0.9500 . ?
C14 C15 1.369(7) . ?
C14 H14 0.9500 . ?
C15 H15 0.9500 . ?
C19 C20 1.378(6) . ?
C19 H19 0.9500 . ?
F4 B1 1.460(10) . ?
C1 C2 1.379(6) . ?
C1 H1 0.9500 . ?
C21 C20 1.402(7) . ?
C21 H21 0.9500 . ?
C4 C3 1.371(7) . ?
C4 H4 0.9500 . ?
C20 H20 0.9500 . ?
F1 B1 1.425(9) . ?
C2 C3 1.378(7) . ?
C2 H2 0.9500 . ?
C3 H3 0.9500 . ?
F3 B1 1.370(8) . ?
F2 B1 1.335(9) . ?
 
loop_
 _geom_angle_atom_site_label_1
 _geom_angle_atom_site_label_2
 _geom_angle_atom_site_label_3
 _geom_angle
 _geom_angle_site_symmetry_1
 _geom_angle_site_symmetry_3
 _geom_angle_publ_flag
N7 Zn1 N2 163.20(12) 12_656 . ?
N7 Zn1 N4 121.06(11) 12_656 . ?
N2 Zn1 N4 75.09(12) . . ?
N7 Zn1 N5 74.42(11) 12_656 12_656 ?
N2 Zn1 N5 108.96(11) . 12_656 ?
N4 Zn1 N5 100.50(11) . 12_656 ?
N7 Zn1 N8 76.05(12) 12_656 12_656 ?
N2 Zn1 N8 99.92(12) . 12_656 ?
N4 Zn1 N8 92.90(11) . 12_656 ?
N5 Zn1 N8 150.41(11) 12_656 12_656 ?
N7 Zn1 N1 89.75(12) 12_656 . ?
N2 Zn1 N1 73.87(12) . . ?
N4 Zn1 N1 148.89(11) . . ?
N5 Zn1 N1 91.38(11) 12_656 . ?
N8 Zn1 N1 90.49(11) 12_656 . ?
C10 N5 C9 117.0(3) . . ?
C10 N5 Zn1 132.1(2) . 11_666 ?
C9 N5 Zn1 110.7(2) . 11_666 ?
C10 N4 C7 116.3(3) . . ?
C10 N4 Zn1 129.7(2) . . ?
C7 N4 Zn1 113.9(2) . . ?
C17 N7 N6 120.0(3) . . ?
C17 N7 Zn1 118.5(3) . 11_666 ?
N6 N7 Zn1 120.7(2) . 11_666 ?
N2 N3 C7 116.1(3) . . ?
N2 N3 H3N 121.9 . . ?
C7 N3 H3N 121.9 . . ?
C9 N6 N7 112.1(3) . . ?
C22 N8 C18 118.8(3) . . ?
C22 N8 Zn1 129.4(3) . 11_666 ?
C18 N8 Zn1 111.7(2) . 11_666 ?
C6 N2 N3 121.4(3) . . ?
C6 N2 Zn1 121.0(3) . . ?
N3 N2 Zn1 117.6(2) . . ?
C1 N1 C5 118.0(4) . . ?
C1 N1 Zn1 128.9(3) . . ?
C5 N1 Zn1 113.0(3) . . ?
N3 C7 N4 117.3(3) . . ?
N3 C7 C8 120.7(3) . . ?
N4 C7 C8 122.0(3) . . ?
N6 C9 N5 121.3(3) . . ?
N6 C9 C8 118.8(3) . . ?
N5 C9 C8 119.9(3) . . ?
C16 C11 C12 119.2(4) . . ?
C16 C11 C10 120.9(3) . . ?
C12 C11 C10 120.0(3) . . ?
N4 C10 N5 126.4(3) . . ?
N4 C10 C11 115.9(3) . . ?
N5 C10 C11 117.7(3) . . ?
N7 C17 C18 117.4(3) . . ?
N7 C17 H17 121.3 . . ?
C18 C17 H17 121.3 . . ?
H2W O1 H1W 112(4) . . ?
C7 C8 C9 118.3(3) . . ?
C7 C8 H8 120.9 . . ?
C9 C8 H8 120.9 . . ?
N1 C5 C4 121.9(4) . . ?
N1 C5 C6 115.7(3) . . ?
C4 C5 C6 122.3(4) . . ?
C11 C16 C15 120.1(4) . . ?
C11 C16 H16 120.0 . . ?
C15 C16 H16 120.0 . . ?
C13 C12 C11 120.4(4) . . ?
C13 C12 H12 119.8 . . ?
C11 C12 H12 119.8 . . ?
N2 C6 C5 116.3(3) . . ?
N2 C6 H6 121.8 . . ?
C5 C6 H6 121.8 . . ?
N8 C18 C19 121.8(4) . . ?
N8 C18 C17 115.9(3) . . ?
C19 C18 C17 122.3(4) . . ?
C14 C13 C12 119.7(4) . . ?
C14 C13 H13 120.2 . . ?
C12 C13 H13 120.2 . . ?
N8 C22 C21 122.5(4) . . ?
N8 C22 H22 118.8 . . ?
C21 C22 H22 118.8 . . ?
C15 C14 C13 119.9(4) . . ?
C15 C14 H14 120.0 . . ?
C13 C14 H14 120.0 . . ?
C14 C15 C16 120.7(4) . . ?
C14 C15 H15 119.7 . . ?
C16 C15 H15 119.7 . . ?
C20 C19 C18 119.0(4) . . ?
C20 C19 H19 120.5 . . ?
C18 C19 H19 120.5 . . ?
N1 C1 C2 123.1(4) . . ?
N1 C1 H1 118.5 . . ?
C2 C1 H1 118.5 . . ?
C22 C21 C20 118.8(4) . . ?
C22 C21 H21 120.6 . . ?
C20 C21 H21 120.6 . . ?
C3 C4 C5 118.5(4) . . ?
C3 C4 H4 120.7 . . ?
C5 C4 H4 120.7 . . ?
C19 C20 C21 119.1(4) . . ?
C19 C20 H20 120.4 . . ?
C21 C20 H20 120.4 . . ?
C3 C2 C1 118.1(4) . . ?
C3 C2 H2 120.9 . . ?
C1 C2 H2 120.9 . . ?
C4 C3 C2 120.2(4) . . ?
C4 C3 H3 119.9 . . ?
C2 C3 H3 119.9 . . ?
F2 B1 F3 112.1(6) . . ?
F2 B1 F1 109.1(6) . . ?
F3 B1 F1 108.2(7) . . ?
F2 B1 F4 107.5(7) . . ?
F3 B1 F4 111.7(6) . . ?
F1 B1 F4 108.1(6) . . ?
 
_refine_diff_density_max    0.795
_refine_diff_density_min   -0.822
_refine_diff_density_rms    0.089

_shelx_res_file
;

    shelx.res created by SHELXL-2014/7

TITL SD261Zn_0m_a.res in P4/ncc
CELL  0.71073  21.6393  21.6393  21.1688   90.000   90.000   90.000
ZERR     4.00   0.0013   0.0013   0.0015    0.000    0.000    0.000
LATT   1
SYMM  1/2 - X, 1/2 - Y,   Z
SYMM  1/2 - Y,   X,   Z
SYMM    Y, 1/2 - X,   Z
SYMM  - X, 1/2 + Y, 1/2 - Z
SYMM  1/2 + X, - Y, 1/2 - Z
SYMM  1/2 + Y, 1/2 + X, 1/2 - Z
SYMM  - Y, - X, 1/2 - Z
SFAC  C    H    B    N    F    ZN   O
UNIT  352 336 16 128 64 16 32
MERG   2
DFIX     0.960   0.020 O1 H2W
DFIX     0.960   0.020 H1W O1
DANG     1.650   0.040 H2W H1W
FMAP   2
PLAN   15
SIZE     0.100   0.140   0.300
ACTA
BOND   $H
LIST   6
L.S.   5
TEMP  -153.16
WGHT    0.064900   34.252399
FVAR       1.06553
ZN1   6    0.546448    0.287360    0.474438    11.00000    0.02142    0.02432 =
         0.01738    0.00143   -0.00194   -0.00135
N5    4    0.704511    0.398159    0.546932    11.00000    0.02038    0.02147 =
         0.01826   -0.00153   -0.00038   -0.00098
N4    4    0.612286    0.340320    0.528737    11.00000    0.02342    0.02536 =
         0.01410   -0.00022   -0.00121   -0.00110
N7    4    0.783421    0.448201    0.623400    11.00000    0.02494    0.02478 =
         0.01937   -0.00227   -0.00158    0.00215
N3    4    0.549174    0.310268    0.612847    11.00000    0.02590    0.04315 =
         0.01884    0.00540    0.00106   -0.00219
AFIX  43
H3N   2    0.538801    0.309039    0.653023    11.00000   -1.20000
AFIX   0
N6    4    0.733236    0.423329    0.652832    11.00000    0.02542    0.03059 =
         0.01651   -0.00317   -0.00055   -0.00219
N8    4    0.871045    0.503723    0.557225    11.00000    0.02691    0.02369 =
         0.02562   -0.00412    0.00070    0.00220
N2    4    0.514986    0.281884    0.567622    11.00000    0.02201    0.02976 =
         0.02313    0.00634   -0.00199    0.00216
N1    4    0.457932    0.232052    0.471244    11.00000    0.02227    0.02444 =
         0.03588    0.00247   -0.00354    0.00017
C7    1    0.600599    0.340840    0.592390    11.00000    0.02131    0.02785 =
         0.02004    0.00310   -0.00034    0.00308
C9    1    0.693171    0.397393    0.611313    11.00000    0.02605    0.02237 =
         0.01584   -0.00100    0.00032    0.00340
C11   1    0.673084    0.373106    0.440033    11.00000    0.02254    0.02704 =
         0.01918   -0.00271   -0.00137   -0.00955
C10   1    0.663033    0.370261    0.509775    11.00000    0.02268    0.01827 =
         0.01906   -0.00091   -0.00240    0.00305
C17   1    0.824667    0.476476    0.655677    11.00000    0.02865    0.03436 =
         0.02099   -0.00465   -0.00459   -0.00031
AFIX  43
H17   2    0.821979    0.479282    0.700378    11.00000   -1.20000
AFIX   0
O1    7    0.521155    0.310440    0.737587    11.00000    0.07613    0.11217 =
         0.02378    0.01515   -0.00007    0.04273
C8    1    0.639548    0.369338    0.634621    11.00000    0.02810    0.02962 =
         0.01542   -0.00139    0.00121    0.00158
AFIX  43
H8    2    0.630302    0.369970    0.678487    11.00000   -1.20000
AFIX   0
C5    1    0.433015    0.222860    0.528764    11.00000    0.02340    0.02697 =
         0.04073    0.01062   -0.00228    0.00222
C16   1    0.707456    0.328373    0.409390    11.00000    0.04631    0.03032 =
         0.02840   -0.00567    0.00783   -0.00272
AFIX  43
H16   2    0.724782    0.295098    0.432699    11.00000   -1.20000
AFIX   0
C12   1    0.647234    0.420928    0.404987    11.00000    0.03124    0.03464 =
         0.02296    0.00246   -0.00279   -0.00080
AFIX  43
H12   2    0.623066    0.451577    0.425531    11.00000   -1.20000
AFIX   0
C6    1    0.466765    0.250160    0.581724    11.00000    0.02443    0.04065 =
         0.03100    0.01318    0.00451    0.00088
AFIX  43
H6    2    0.453732    0.244723    0.624216    11.00000   -1.20000
AFIX   0
C18   1    0.875959    0.504222    0.621137    11.00000    0.02882    0.02767 =
         0.02415   -0.00424   -0.00359   -0.00071
C13   1    0.656514    0.424172    0.340176    11.00000    0.04377    0.05378 =
         0.02203    0.00747   -0.00821   -0.00839
AFIX  43
H13   2    0.638395    0.456658    0.316341    11.00000   -1.20000
AFIX   0
C22   1    0.916411    0.529118    0.522734    11.00000    0.03343    0.02996 =
         0.03419   -0.00368    0.00467    0.00001
AFIX  43
H22   2    0.912830    0.528946    0.478006    11.00000   -1.20000
AFIX   0
C14   1    0.692308    0.379824    0.310461    11.00000    0.04899    0.05913 =
         0.01808   -0.00748    0.00350   -0.02590
AFIX  43
H14   2    0.699951    0.382574    0.266358    11.00000   -1.20000
AFIX   0
C15   1    0.716676    0.332009    0.344688    11.00000    0.05546    0.04338 =
         0.03247   -0.01906    0.01497   -0.01506
AFIX  43
H15   2    0.740152    0.300989    0.323888    11.00000   -1.20000
AFIX   0
C19   1    0.926751    0.530172    0.651623    11.00000    0.03370    0.04295 =
         0.03486   -0.00819   -0.00771   -0.00746
AFIX  43
H19   2    0.929189    0.530282    0.696431    11.00000   -1.20000
AFIX   0
F4    5    0.358916    0.427956    0.699691    11.00000    0.13822    0.12321 =
         0.09889   -0.00179   -0.00050    0.06925
C1    1    0.426828    0.210947    0.420578    11.00000    0.03069    0.03448 =
         0.04200   -0.00302   -0.00708   -0.00297
AFIX  43
H1    2    0.444390    0.216865    0.379896    11.00000   -1.20000
AFIX   0
C21   1    0.968105    0.555493    0.549790    11.00000    0.03014    0.04001 =
         0.04724   -0.00289    0.00938   -0.00564
AFIX  43
H21   2    0.999501    0.573186    0.524161    11.00000   -1.20000
AFIX   0
C4    1    0.377444    0.190962    0.536888    11.00000    0.03027    0.03982 =
         0.05305    0.01905    0.00200   -0.00563
AFIX  43
H4    2    0.361564    0.183233    0.577974    11.00000   -1.20000
AFIX   0
C20   1    0.973424    0.555689    0.615810    11.00000    0.03071    0.04977 =
         0.05484   -0.01027   -0.00322   -0.01055
AFIX  43
H20   2    1.008736    0.573181    0.635593    11.00000   -1.20000
AFIX   0
F1    5    0.423974    0.454041    0.615782    11.00000    0.13040    0.13224 =
         0.09540   -0.00913    0.00713    0.03001
C2    1    0.370654    0.181133    0.424957    11.00000    0.03574    0.03954 =
         0.05824   -0.00394   -0.00841   -0.00830
AFIX  43
H2    2    0.349324    0.167911    0.388135    11.00000   -1.20000
AFIX   0
C3    1    0.346326    0.171055    0.484252    11.00000    0.03334    0.03171 =
         0.07496    0.00568   -0.00607   -0.01024
AFIX  43
H3    2    0.307900    0.150265    0.488663    11.00000   -1.20000
AFIX   0
F3    5    0.466773    0.422390    0.707843    11.00000    0.13041    0.12430 =
         0.09255   -0.03100   -0.02165    0.02538
F2    5    0.413827    0.355394    0.647690    11.00000    0.14140    0.10351 =
         0.12063   -0.02711   -0.05745    0.05226
B1    3    0.417339    0.413567    0.668436    11.00000    0.07885    0.07790 =
         0.06159   -0.01286   -0.02474    0.02936
H2W   2    0.487650    0.337661    0.748688    11.00000   -1.20000
H1W   2    0.550726    0.307048    0.770921    11.00000   -1.20000
HKLF    4

REM  SD261Zn_0m_a.res in P4/ncc
REM R1 =  0.0604 for    4787 Fo > 4sig(Fo)  and  0.0623 for all    4911 data
REM    340 parameters refined using      3 restraints

END

WGHT      0.0649     34.2521

REM Highest difference peak  0.795,  deepest hole -0.822,  1-sigma level  0.089
Q1    1   0.3830  0.3772  0.7023  11.00000  0.05    0.79
Q2    1   0.4192  0.3727  0.7438  11.00000  0.05    0.66
Q3    1   0.3193  0.4138  0.7233  11.00000  0.05    0.58
Q4    1   0.4379  0.4664  0.6976  11.00000  0.05    0.49
Q5    1   0.5497  0.4503  0.7500  10.50000  0.05    0.49
Q6    1   0.5386  0.3165  0.4962  11.00000  0.05    0.44
Q7    1   0.3580  0.3317  0.6663  11.00000  0.05    0.39
Q8    1   0.5191  0.3497  0.7473  11.00000  0.05    0.31
Q9    1   0.6726  0.3690  0.4783  11.00000  0.05    0.30
Q10   1   0.4422  0.2448  0.5581  11.00000  0.05    0.29
Q11   1   0.4424  0.2397  0.4999  11.00000  0.05    0.29
Q12   1   0.6664  0.4002  0.4241  11.00000  0.05    0.28
Q13   1   0.7342  0.4143  0.5367  11.00000  0.05    0.28
Q14   1   0.8589  0.4192  0.6995  11.00000  0.05    0.28
Q15   1   0.4474  0.2706  0.6043  11.00000  0.05    0.27
;
_shelx_res_checksum   67597

_shelx_hkl_file
;
   0  -2   0   55477     190                                                        4100 -161.37    0.00  1.0000
   0  -2   0   55330     190                                                        4060 -161.37    0.00  1.0000
   2   0   0   57450     180                                                        4650 -161.37    0.00  1.0000
   2   0   0   57098     170                                                        4550 -161.37    0.00  1.0000
   2   0   0   55178     190                                                        4020 -161.37    0.00  1.0000
   2   0   0   56849     180                                                        4480 -161.37    0.00  1.0000
   0  -2   0   56098     190                                                        4270 -161.37    0.00  1.0000
   0  -2   0   56315     200                                                        4330 -161.37    0.00  1.0000
   0  -2   0   57243     200                                                        4590 -161.37    0.00  1.0000
   0  -2   0   57278     180                                                        4600 -161.37    0.00  1.0000
  -2   0   0   57975     200                                                        4800 -161.37    0.00  1.0000
  -2   0   0   57450     180                                                        4650 -161.37    0.00  1.0000
  -2   0   0   56956     180                                                        4510 -161.37    0.00  1.0000
   0   2   0   58256     200                                                        4880 -161.37    0.00  1.0000
   0   2   0   55624     190                                                        4140 -161.37    0.00  1.0000
   2   0   0   54806     190                                                        3920 -161.37    0.00  1.0000
  -2   0   0   57168     200                                                        4570 -161.37    0.00  1.0000
  -2   0   0   56885     190                                                        4490 -161.37    0.00  1.0000
   0  -2   0   57278     210                                                        4600 -161.37    0.00  1.0000
   0  -2   0   55145     200                                                        4010 -161.37    0.00  1.0000
   0   2   0   56062     200                                                        4260 -161.37    0.00  1.0000
   0   2   0   56062     190                                                        4260 -161.37    0.00  1.0000
   0   2   0   56959     210                                                        4510 -161.37    0.00  1.0000
   2  -2   0  613131   17818                                                      473963   89.02    0.00  1.0000
   2  -2   0  640067   17838                                                      497680   89.02    0.00  1.0000
   2  -2   0  629504   17828                                                      488371   89.02    0.00  1.0000
  -2   2   0  586319   17738                                                      450425   89.02    0.00  1.0000
  -2   2   0  599838   17738                                                      462284   89.02    0.00  1.0000
   2   2   0  613645   17688                                                      474403   89.03    0.00  1.0000
   2   2   0  622874   17698                                                      482522   89.03    0.00  1.0000
   2   2   0  630834   17678                                                      489531   89.03    0.00  1.0000
   2   2   0  596353   17668                                                      459214   89.03    0.00  1.0000
  -2   2   0  602423   17738                                                      464554   89.02    0.00  1.0000
  -2   2   0  594061   17748                                                      457214   89.02    0.00  1.0000
   2  -2   0  589650   17718                                                      453345   89.02    0.00  1.0000
  -2  -2   0  603848   17678                                                      465793   89.03    0.00  1.0000
   2  -2   0  639488   17868                                                      497170   89.02    0.00  1.0000
  -2  -2   0  610028   17688                                                      471223   89.03    0.00  1.0000
  -2  -2   0  602868   17678                                                      464933   89.03    0.00  1.0000
  -2  -2   0  620750   17678                                                      480652   89.03    0.00  1.0000
  -2   2   0  635587   17858                                                      493731   89.02    0.00  1.0000
  -2   2   0  615985   17808                                                      476472   89.02    0.00  1.0000
  -2   2   0  616428   17778                                                      476862   89.02    0.00  1.0000
  -2   2   0  601421   17758                                                      463674   89.02    0.00  1.0000
   2  -2   0  618861   17828                                                      479002   89.02    0.00  1.0000
  -2  -2   0  602300   17698                                                      464434   89.03    0.00  1.0000
   2  -2   0  614018   17808                                                      474743   89.02    0.00  1.0000
   2  -2   0  597047   17708                                                      459834   89.02    0.00  1.0000
  -2   2   0  585030   17718                                                      449295   89.02    0.00  1.0000
   1  -3   0    6872     860                                                       22478  -63.20    0.00  1.0000
   1  -3   0    6146     870                                                       21148  -63.20    0.00  1.0000
   1  -3   0    6872     880                                                       22478  -63.20    0.00  1.0000
   1  -3   0    7211     870                                                       23088  -63.20    0.00  1.0000
   3   1   0    6488     840                                                       21778   63.20    0.00  1.0000
   3   1   0    6456     840                                                       21718   63.20    0.00  1.0000
   1  -3   0    6044     880                                                       20958  -63.20    0.00  1.0000
   1  -3   0    6894     890                                                       22518  -63.20    0.00  1.0000
   1  -3   0    6504     880                                                       21808  -63.20    0.00  1.0000
  -1   3   0    6136     870                                                       21128  -63.20    0.00  1.0000
  -1   3   0    6233     860                                                       21308  -63.20    0.00  1.0000
  -1   3   0    6071     860                                                       21008  -63.20    0.00  1.0000
   1  -3   0    6368     890                                                       21558  -63.20    0.00  1.0000
  -1   3   0    6806     880                                                       22358  -63.20    0.00  1.0000
  -1   3   0    6933     860                                                       22588  -63.20    0.00  1.0000
   3   1   0    6581     840                                                       21948   63.20    0.00  1.0000
   3   1   0    6702     840                                                       22168   63.20    0.00  1.0000
   3   1   0    6494     840                                                       21788   63.20    0.00  1.0000
  -3  -1   0    6972     850                                                       22658   63.20    0.00  1.0000
  -3  -1   0    6342     840                                                       21508   63.20    0.00  1.0000
  -3  -1   0    6680     830                                                       22128   63.20    0.00  1.0000
  -3  -1   0    6565     850                                                       21918   63.20    0.00  1.0000
   3   1   0    7228     830                                                       23118   63.20    0.00  1.0000
   3   1   0    6746     840                                                       22248   63.20    0.00  1.0000
   3   1   0    6653     850                                                       22078   63.20    0.00  1.0000
  -1   3   0    5943     880                                                       20768  -63.20    0.00  1.0000
   1  -3   0    7133     870                                                       22948  -63.20    0.00  1.0000
  -1   3   0    6173     890                                                       21198  -63.20    0.00  1.0000
  -1   3   0    7842     890                                                       24208  -63.20    0.00  1.0000
   3   1   0    7346     850                                                       23328   63.20    0.00  1.0000
  -3  -1   0    5804     840                                                       20508   63.20    0.00  1.0000
   1   3   0    6341     880                                                       21508   63.20    0.00  1.0000
   3  -1   0    6731     850                                                       22218  -63.19    0.00  1.0000
   3  -1   0    6365     870                                                       21548  -63.19    0.00  1.0000
  -1  -3   0    6319     850                                                       21468   63.20    0.00  1.0000
   1   3   0    6281     860                                                       21398   63.20    0.00  1.0000
   3  -1   0    6370     860                                                       21558  -63.19    0.00  1.0000
   1   3   0    6553     850                                                       21898   63.20    0.00  1.0000
   3  -1   0    6902     880                                                       22528  -63.19    0.00  1.0000
   1   3   0    6303     860                                                       21438   63.20    0.00  1.0000
  -3   1   0    6676     880                                                       22118  -63.19    0.00  1.0000
  -3   1   0    6638     860                                                       22048  -63.19    0.00  1.0000
  -3   1   0    7765     880                                                       24068  -63.19    0.00  1.0000
   3  -1   0    6490     880                                                       21778  -63.19    0.00  1.0000
   1   3   0    7016     850                                                       22738   63.20    0.00  1.0000
  -3   1   0    6665     860                                                       22098  -63.19    0.00  1.0000
  -1  -3   0    6916     880                                                       22558   63.20    0.00  1.0000
  -1  -3   0    6938     850                                                       22598   63.20    0.00  1.0000
  -1  -3   0    6762     850                                                       22278   63.20    0.00  1.0000
  -1  -3   0    6817     860                                                       22378   63.20    0.00  1.0000
  -1  -3   0    6373     850                                                       21568   63.20    0.00  1.0000
   1   3   0    7022     860                                                       22748   63.20    0.00  1.0000
  -3   1   0    6825     880                                                       22388  -63.19    0.00  1.0000
  -3   1   0    6311     850                                                       21448  -63.19    0.00  1.0000
   1   3   0    7111     850                                                       22908   63.20    0.00  1.0000
   3  -1   0    6676     870                                                       22118  -63.19    0.00  1.0000
   1   3   0    6646     870                                                       22068   63.20    0.00  1.0000
   1   3   0    6592     840                                                       21968   63.20    0.00  1.0000
  -1  -3   0    6173     850                                                       21198   63.20    0.00  1.0000
  -1  -3   0    7183     850                                                       23038   63.20    0.00  1.0000
   1   3   0    6346     850                                                       21518   63.20    0.00  1.0000
   3  -1   0    6468     890                                                       21738  -63.19    0.00  1.0000
   3  -1   0    7269     880                                                       23188  -63.19    0.00  1.0000
   3  -1   0    7398     880                                                       23418  -63.19    0.00  1.0000
   1   3   0    6390     870                                                       21598   63.20    0.00  1.0000
  -3   1   0    6693     870                                                       22148  -63.19    0.00  1.0000
  -3   1   0    6797     890                                                       22338  -63.19    0.00  1.0000
  -1  -3   0    6597     860                                                       21978   63.20    0.00  1.0000
   3  -1   0    7091     880                                                       22868  -63.19    0.00  1.0000
  -3   1   0    6770     880                                                       22288  -63.19    0.00  1.0000
  -1  -3   0    6944     870                                                       22608   63.20    0.00  1.0000
   3   3   0  491955   19208                                                      508949  -11.30    0.00  1.0000
  -3   3   0  493759   19288                                                      510779   11.30    0.00  1.0000
  -3  -3   0  508423   19208                                                      525697  -11.30    0.00  1.0000
  -3  -3   0  483049   19188                                                      499890  -11.30    0.00  1.0000
  -3  -3   0  488986   19198                                                      505929  -11.30    0.00  1.0000
   3  -3   0  505568   19338                                                      522788   11.30    0.00  1.0000
  -3  -3   0  494285   19208                                                      511319  -11.30    0.00  1.0000
  -3   3   0  493287   19238                                                      510299   11.30    0.00  1.0000
  -3   3   0  517485   19218                                                      534906   11.30    0.00  1.0000
  -3   3   0  515126   19328                                                      532507   11.30    0.00  1.0000
   3  -3   0  519846   19308                                                      537306   11.30    0.00  1.0000
   3  -3   0  496591   19298                                                      513659   11.30    0.00  1.0000
   3  -3   0  484342   19278                                                      501200   11.30    0.00  1.0000
   3  -3   0  506984   19288                                                      524228   11.30    0.00  1.0000
   3  -3   0  462318   19298                                                      478792   11.30    0.00  1.0000
   3   3   0  502229   19188                                                      519398  -11.30    0.00  1.0000
   3   3   0  498119   19188                                                      515218  -11.30    0.00  1.0000
   3  -3   0  477069   19298                                                      493801   11.30    0.00  1.0000
  -3   3   0  488627   19218                                                      505559   11.30    0.00  1.0000
   3  -3   0  510258   19368                                                      527557   11.30    0.00  1.0000
   3   3   0  504786   19208                                                      521998  -11.30    0.00  1.0000
  -3   3   0  498428   19268                                                      515528   11.30    0.00  1.0000
  -3  -3   0  498532   19208                                                      515638  -11.30    0.00  1.0000
   3   3   0  494492   19208                                                      511529  -11.30    0.00  1.0000
  -3   3   0  490544   19268                                                      507509   11.30    0.00  1.0000
  -3   3   0  500631   19228                                                      517768   11.30    0.00  1.0000
  -3   3   0  479859   19258                                                      496640   11.30    0.00  1.0000
   3   3   0  502111   19188                                                      519278  -11.30    0.00  1.0000
   3   3   0  468710   19188                                                      485301  -11.30    0.00  1.0000
   3  -3   0  503502   19238                                                      520688   11.30    0.00  1.0000
   3   3   0  492614   19218                                                      509619  -11.30    0.00  1.0000
  -3  -3   0  475609   19248                                                      492321  -11.30    0.00  1.0000
  -2   4   0   50487    1920                                                       47425   -6.51    0.00  1.0000
   2  -4   0   52684    1890                                                       49555   -6.51    0.00  1.0000
   2  -4   0   50890    1910                                                       47815   -6.51    0.00  1.0000
   2  -4   0   52148    1910                                                       49035   -6.51    0.00  1.0000
  -2   4   0   53097    1930                                                       49955   -6.51    0.00  1.0000
  -2   4   0   53870    1940                                                       50705   -6.51    0.00  1.0000
   2  -4   0   53550    1930                                                       50395   -6.51    0.00  1.0000
  -2   4   0   52849    1890                                                       49715   -6.51    0.00  1.0000
   2  -4   0   51086    1920                                                       48005   -6.51    0.00  1.0000
  -4  -2   0   52271    1870                                                       49155   -6.51    0.00  1.0000
  -2   4   0   50807    1910                                                       47735   -6.51    0.00  1.0000
  -2   4   0   52034    1910                                                       48925   -6.51    0.00  1.0000
  -2   4   0   52509    1900                                                       49385   -6.51    0.00  1.0000
  -2   4   0   52004    1890                                                       48895   -6.51    0.00  1.0000
   2  -4   0   54694    1940                                                       51505   -6.51    0.00  1.0000
   4   2   0   50064    1850                                                       47015   -6.51    0.00  1.0000
  -4  -2   0   52550    1850                                                       49425   -6.51    0.00  1.0000
   4   2   0   51972    1860                                                       48865   -6.51    0.00  1.0000
   4   2   0   53138    1870                                                       49995   -6.51    0.00  1.0000
  -4  -2   0   52261    1860                                                       49145   -6.51    0.00  1.0000
   2  -4   0   52540    1920                                                       49415   -6.51    0.00  1.0000
   2  -4   0   53004    1900                                                       49865   -6.51    0.00  1.0000
  -2   4   0   51302    1930                                                       48215   -6.51    0.00  1.0000
  -4  -2   0   52447    1870                                                       49325   -6.51    0.00  1.0000
  -4  -2   0   51570    1870                                                       48475   -6.51    0.00  1.0000
   2  -4   0   52715    1930                                                       49585   -6.51    0.00  1.0000
   4   2   0   55776    1860                                                       52555   -6.51    0.00  1.0000
   4   0   0    2946     100                                                        1250   19.00    0.00  1.0000
   4   0   0    3739     130                                                        1790   19.00    0.00  1.0000
   4   0   0    3552     100                                                        1660   19.00    0.00  1.0000
   4   0   0    3215      80                                                        1430   19.00    0.00  1.0000
   4   0   0    3768     120                                                        1810   19.00    0.00  1.0000
  -4   0   0    3215     130                                                        1430   19.00    0.00  1.0000
   0  -4   0    3422     130                                                        1570   19.00    0.00  1.0000
  -4   0   0    3581      90                                                        1680   19.00    0.00  1.0000
   0   4   0    3769     160                                                        1810   19.00    0.00  1.0000
   0  -4   0    3668     160                                                        1740   19.00    0.00  1.0000
   0  -4   0    3596     160                                                        1690   19.00    0.00  1.0000
  -4   0   0    3782     120                                                        1820   19.00    0.00  1.0000
   4   0   0    3421     120                                                        1570   19.00    0.00  1.0000
   0   4   0    3640     130                                                        1720   19.00    0.00  1.0000
   0   4   0    3320     110                                                        1500   19.00    0.00  1.0000
   0   4   0    3697     110                                                        1760   19.00    0.00  1.0000
   4   0   0    3796     140                                                        1830   19.00    0.00  1.0000
   4   0   0    3494     120                                                        1620   19.00    0.00  1.0000
   0   4   0    3320     110                                                        1500   19.00    0.00  1.0000
   4   0   0    3509     100                                                        1630   19.00    0.00  1.0000
  -4   0   0    3667      90                                                        1740   19.00    0.00  1.0000
  -4   0   0    3610     140                                                        1700   19.00    0.00  1.0000
   0   4   0    3305     130                                                        1490   19.00    0.00  1.0000
   0   4   0    3769     120                                                        1810   19.00    0.00  1.0000
  -4   0   0    3171     110                                                        1400   19.00    0.00  1.0000
  -4   0   0    3348     100                                                        1520   19.00    0.00  1.0000
   0  -4   0    3231     120                                                        1440   19.00    0.00  1.0000
   4   0   0    3066     120                                                        1330   19.00    0.00  1.0000
   0  -4   0    3451     120                                                        1590   19.00    0.00  1.0000
   0   4   0    3538     140                                                        1650   19.00    0.00  1.0000
   0  -4   0    2962     130                                                        1260   19.00    0.00  1.0000
   0  -4   0    3495     120                                                        1620   19.00    0.00  1.0000
   0  -4   0    3378     110                                                        1540   19.00    0.00  1.0000
   0  -4   0    3854     130                                                        1870   19.00    0.00  1.0000
   0  -4   0    3364     130                                                        1530   19.00    0.00  1.0000
   0  -4   0    3925     130                                                        1920   19.00    0.00  1.0000
   0   4   0    3509     150                                                        1630   19.00    0.00  1.0000
   0   4   0    4024     170                                                        1990   19.00    0.00  1.0000
  -4   2   0   52172    1910                                                       49065   -6.50    0.00  1.0000
   2   4   0   52011    1900                                                       48905   -6.51    0.00  1.0000
  -2  -4   0   51774    1870                                                       48675   -6.51    0.00  1.0000
  -2  -4   0   51186    1880                                                       48105   -6.51    0.00  1.0000
  -2  -4   0   51630    1870                                                       48535   -6.51    0.00  1.0000
  -4   2   0   53512    1920                                                       50365   -6.50    0.00  1.0000
  -4   2   0   51234    1880                                                       48155   -6.50    0.00  1.0000
   2   4   0   54424    1890                                                       51245   -6.51    0.00  1.0000
  -4   2   0   53203    1900                                                       50065   -6.50    0.00  1.0000
  -4   2   0   53255    1920                                                       50115   -6.50    0.00  1.0000
  -4   2   0   51450    1910                                                       48365   -6.50    0.00  1.0000
   4  -2   0   52358    1880                                                       49245   -6.50    0.00  1.0000
   2   4   0   51042    1880                                                       47965   -6.51    0.00  1.0000
   2   4   0   51640    1860                                                       48545   -6.51    0.00  1.0000
   4  -2   0   52059    1930                                                       48955   -6.50    0.00  1.0000
   4  -2   0   51584    1910                                                       48495   -6.50    0.00  1.0000
   4  -2   0   52079    1920                                                       48975   -6.50    0.00  1.0000
   4  -2   0   52193    1910                                                       49085   -6.50    0.00  1.0000
   4  -2   0   54141    1920                                                       50975   -6.50    0.00  1.0000
   4  -2   0   52626    1880                                                       49505   -6.50    0.00  1.0000
   4  -2   0   49665    1900                                                       46635   -6.50    0.00  1.0000
   4  -2   0   54419    1910                                                       51245   -6.50    0.00  1.0000
  -2  -4   0   51918    1900                                                       48815   -6.51    0.00  1.0000
   2   4   0   51846    1870                                                       48745   -6.51    0.00  1.0000
   2   4   0   52857    1880                                                       49725   -6.51    0.00  1.0000
   2   4   0   53011    1850                                                       49875   -6.51    0.00  1.0000
   2   4   0   52197    1880                                                       49085   -6.51    0.00  1.0000
  -2  -4   0   53042    1880                                                       49905   -6.51    0.00  1.0000
  -2  -4   0   51073    1860                                                       47995   -6.51    0.00  1.0000
   2   4   0   53712    1880                                                       50555   -6.51    0.00  1.0000
  -4   2   0   54976    1940                                                       51785   -6.50    0.00  1.0000
  -4   2   0   54337    1910                                                       51165   -6.50    0.00  1.0000
   2   4   0   49422    1860                                                       46395   -6.51    0.00  1.0000
   2   4   0   51784    1870                                                       48685   -6.51    0.00  1.0000
  -2  -4   0   51960    1860                                                       48855   -6.51    0.00  1.0000
   4  -2   0   53430    1900                                                       50285   -6.50    0.00  1.0000
  -4   2   0   53894    1910                                                       50735   -6.50    0.00  1.0000
  -2  -4   0   52630    1870                                                       49505   -6.51    0.00  1.0000
  -4   2   0   51584    1880                                                       48495   -6.50    0.00  1.0000
  -4   4   0   98947    3800                                                       97190   -2.64    0.00  1.0000
  -4   4   0   99663    3780                                                       97900   -2.64    0.00  1.0000
   4  -4   0   97756    3810                                                       96010   -2.64    0.00  1.0000
  -4  -4   0  101787    3730                                                      100000   -2.65    0.00  1.0000
   4  -4   0   99814    3780                                                       98050   -2.64    0.00  1.0000
  -4  -4   0   98650    3710                                                       96890   -2.65    0.00  1.0000
   4   4   0  100668    3720                                                       98890   -2.65    0.00  1.0000
   4   4   0  101051    3700                                                       99270   -2.65    0.00  1.0000
   4   4   0  100405    3700                                                       98630   -2.65    0.00  1.0000
  -4  -4   0  101333    3740                                                       99550   -2.65    0.00  1.0000
  -4   4   0  102589    3820                                                      100800   -2.64    0.00  1.0000
   4  -4   0  102508    3770                                                      100720   -2.64    0.00  1.0000
  -4  -4   0  101465    3700                                                       99680   -2.65    0.00  1.0000
  -4   4   0  104637    3790                                                      102830   -2.64    0.00  1.0000
   4   4   0  100577    3710                                                       98800   -2.65    0.00  1.0000
   4   4   0   98175    3720                                                       96420   -2.65    0.00  1.0000
  -4  -4   0   97378    3710                                                       95630   -2.65    0.00  1.0000
   4  -4   0   99027    3790                                                       97270   -2.64    0.00  1.0000
   4  -4   0  103325    3800                                                      101530   -2.64    0.00  1.0000
  -4  -4   0   98337    3710                                                       96580   -2.65    0.00  1.0000
  -4   4   0   96597    3740                                                       94861   -2.64    0.00  1.0000
  -4   4   0  102690    3780                                                      100900   -2.64    0.00  1.0000
  -4   4   0  103557    3790                                                      101760   -2.64    0.00  1.0000
   4  -4   0  100783    3750                                                       99010   -2.64    0.00  1.0000
   4   4   0  100325    3710                                                       98550   -2.65    0.00  1.0000
   4   4   0  101001    3720                                                       99220   -2.65    0.00  1.0000
   4   4   0   99235    3710                                                       97470   -2.65    0.00  1.0000
   4  -4   0  102549    3790                                                      100760   -2.64    0.00  1.0000
   4  -4   0   98876    3790                                                       97120   -2.64    0.00  1.0000
  -4   4   0  101287    3750                                                       99510   -2.64    0.00  1.0000
   5   3   0  365010   12809                                                      363354    1.29    0.00  1.0000
   3  -5   0  338156   12849                                                      336556   -1.30    0.00  1.0000
   3  -5   0  362130   12909                                                      360474   -1.30    0.00  1.0000
   5   3   0  351349   12829                                                      349725    1.29    0.00  1.0000
   3  -5   0  345203   12879                                                      343586   -1.30    0.00  1.0000
   3  -5   0  337134   12869                                                      335536   -1.30    0.00  1.0000
   5   3   0  324920   12809                                                      323358    1.29    0.00  1.0000
  -3   5   0  335771   12889                                                      334177   -1.30    0.00  1.0000
  -5  -3   0  347160   12829                                                      345545    1.29    0.00  1.0000
  -5  -3   0  335444   12809                                                      333857    1.29    0.00  1.0000
  -5  -3   0  341908   12819                                                      340306    1.29    0.00  1.0000
  -3   5   0  340411   12879                                                      338806   -1.30    0.00  1.0000
  -3   5   0  345483   12869                                                      343866   -1.30    0.00  1.0000
  -3   5   0  349241   12909                                                      347615   -1.30    0.00  1.0000
   3  -5   0  349381   12899                                                      347755   -1.30    0.00  1.0000
   3  -5   0  347597   12899                                                      345975   -1.30    0.00  1.0000
   3  -5   0  338968   12889                                                      337366   -1.30    0.00  1.0000
   3  -5   0  351005   12889                                                      349375   -1.30    0.00  1.0000
  -5  -3   0  343161   12849                                                      341556    1.29    0.00  1.0000
   3  -5   0  355846   12919                                                      354205   -1.30    0.00  1.0000
   5   3   0  341076   12809                                                      339476    1.29    0.00  1.0000
  -3   5   0  335130   12849                                                      333537   -1.30    0.00  1.0000
  -3   5   0  343348   12849                                                      341736   -1.30    0.00  1.0000
  -5  -3   0  343502   12829                                                      341896    1.29    0.00  1.0000
  -3   5   0  340081   12919                                                      338476   -1.30    0.00  1.0000
  -3   5   0  332644   12899                                                      331057   -1.30    0.00  1.0000
  -1   5   0     545     130                                                         650    3.26    0.00  1.0000
  -5  -1   0     482      90                                                         580   -3.26    0.00  1.0000
   1  -5   0     455     100                                                         550    3.26    0.00  1.0000
  -5  -1   0     267      60                                                         340   -3.26    0.00  1.0000
  -5  -1   0     241      50                                                         310   -3.26    0.00  1.0000
   1  -5   0     259     120                                                         330    3.26    0.00  1.0000
  -5  -1   0     250      50                                                         320   -3.26    0.00  1.0000
  -1   5   0     172      60                                                         230    3.26    0.00  1.0000
  -1   5   0     320     100                                                         400    3.26    0.00  1.0000
   1  -5   0     347     130                                                         430    3.26    0.00  1.0000
   5   1   0     207      70                                                         270   -3.26    0.00  1.0000
   5   1   0     276      60                                                         350   -3.26    0.00  1.0000
   1  -5   0     267      70                                                         340    3.26    0.00  1.0000
   5   1   0     320      70                                                         400   -3.26    0.00  1.0000
   5   1   0     250      40                                                         320   -3.26    0.00  1.0000
   5   1   0     365      80                                                         450   -3.26    0.00  1.0000
   1  -5   0     198      70                                                         260    3.26    0.00  1.0000
  -5  -1   0     294      60                                                         370   -3.26    0.00  1.0000
  -5  -1   0     276      30                                                         350   -3.26    0.00  1.0000
   1  -5   0     410      90                                                         500    3.26    0.00  1.0000
   1  -5   0     311     110                                                         390    3.26    0.00  1.0000
   1  -5   0     347      90                                                         430    3.26    0.00  1.0000
   5   1   0     329      60                                                         410   -3.26    0.00  1.0000
   5   1   0     285      40                                                         360   -3.26    0.00  1.0000
   1  -5   0     365     110                                                         450    3.26    0.00  1.0000
  -1   5   0     181      70                                                         240    3.26    0.00  1.0000
  -1   5   0     285     130                                                         360    3.26    0.00  1.0000
   1  -5   0      36     100                                                          60    3.26    0.00  1.0000
  -1   5   0     285     110                                                         360    3.26    0.00  1.0000
  -1   5   0      51     100                                                          80    3.26    0.00  1.0000
  -1   5   0     464      90                                                         560    3.26    0.00  1.0000
  -5  -1   0     320      90                                                         400   -3.26    0.00  1.0000
  -1   5   0     383      80                                                         470    3.26    0.00  1.0000
   5   1   0     463      80                                                         560   -3.26    0.00  1.0000
  -5  -1   0     329      90                                                         410   -3.26    0.00  1.0000
  -1  -5   0     198      90                                                         260   -3.25    0.00  1.0000
  -5   1   0     464     100                                                         560    3.25    0.00  1.0000
  -1  -5   0     401      60                                                         490   -3.25    0.00  1.0000
   1   5   0     259     100                                                         330   -3.25    0.00  1.0000
  -5   1   0     329     100                                                         410    3.25    0.00  1.0000
   1   5   0     164     100                                                         220   -3.25    0.00  1.0000
   5  -1   0     233      50                                                         300    3.25    0.00  1.0000
  -1  -5   0     207      60                                                         270   -3.25    0.00  1.0000
   1   5   0     215      90                                                         280   -3.25    0.00  1.0000
  -5   1   0     312      90                                                         390    3.25    0.00  1.0000
  -1  -5   0     312      90                                                         390   -3.25    0.00  1.0000
   5  -1   0     294      80                                                         370    3.25    0.00  1.0000
   1   5   0     329     110                                                         410   -3.25    0.00  1.0000
  -1  -5   0     139     110                                                         190   -3.25    0.00  1.0000
  -5   1   0     401     120                                                         490    3.25    0.00  1.0000
   1   5   0     224      50                                                         290   -3.25    0.00  1.0000
   5  -1   0     365     110                                                         450    3.25    0.00  1.0000
   1   5   0     285      60                                                         360   -3.25    0.00  1.0000
  -1  -5   0     173      90                                                         230   -3.25    0.00  1.0000
   1   5   0     446      90                                                         540   -3.25    0.00  1.0000
   1   5   0     338      80                                                         420   -3.25    0.00  1.0000
  -5   1   0     215      50                                                         280    3.25    0.00  1.0000
  -1  -5   0     276      70                                                         350   -3.25    0.00  1.0000
   1   5   0     383      60                                                         470   -3.25    0.00  1.0000
  -5   1   0     276      80                                                         350    3.25    0.00  1.0000
  -5   1   0     294      60                                                         370    3.25    0.00  1.0000
   5  -1   0     276      80                                                         350    3.25    0.00  1.0000
   5  -1   0     437     100                                                         530    3.25    0.00  1.0000
   5  -1   0     241      70                                                         310    3.25    0.00  1.0000
   5  -1   0     365      60                                                         450    3.25    0.00  1.0000
  -1  -5   0     268     100                                                         340   -3.25    0.00  1.0000
   5  -1   0     250     100                                                         320    3.25    0.00  1.0000
  -1  -5   0     241      70                                                         310   -3.25    0.00  1.0000
   5  -1   0     250     100                                                         320    3.25    0.00  1.0000
  -5   1   0     365      70                                                         450    3.25    0.00  1.0000
  -1  -5   0     303      60                                                         380   -3.25    0.00  1.0000
  -1  -5   0     250      70                                                         320   -3.25    0.00  1.0000
   1   5   0     320      60                                                         400   -3.25    0.00  1.0000
   5  -1   0     147      80                                                         200    3.25    0.00  1.0000
   1   5   0     392      90                                                         480   -3.25    0.00  1.0000
  -1  -5   0     356      70                                                         440   -3.25    0.00  1.0000
  -5   1   0     276     110                                                         350    3.25    0.00  1.0000
  -5   3   0  346413   12789                                                      344805   -1.29    0.00  1.0000
   3   5   0  342271   12749                                                      340676    1.28    0.00  1.0000
  -5   3   0  337954   12799                                                      336366   -1.29    0.00  1.0000
   3   5   0  344998   12779                                                      343396    1.28    0.00  1.0000
   5  -3   0  343617   12799                                                      342016   -1.29    0.00  1.0000
   5  -3   0  350222   12809                                                      348605   -1.29    0.00  1.0000
   3   5   0  338242   12779                                                      336656    1.28    0.00  1.0000
   3   5   0  335517   12749                                                      333937    1.28    0.00  1.0000
   5  -3   0  353449   12809                                                      351825   -1.29    0.00  1.0000
   3   5   0  340447   12749                                                      338856    1.28    0.00  1.0000
  -5   3   0  333755   12759                                                      332177   -1.29    0.00  1.0000
  -5   3   0  346974   12759                                                      345365   -1.29    0.00  1.0000
  -3  -5   0  343093   12739                                                      341496    1.28    0.00  1.0000
   3   5   0  340588   12779                                                      338996    1.28    0.00  1.0000
  -5   3   0  341582   12809                                                      339986   -1.29    0.00  1.0000
  -3  -5   0  340347   12739                                                      338756    1.28    0.00  1.0000
   5  -3   0  336271   12789                                                      334687   -1.29    0.00  1.0000
   5  -3   0  336221   12789                                                      334637   -1.29    0.00  1.0000
  -3  -5   0  338212   12759                                                      336626    1.28    0.00  1.0000
   5  -3   0  347756   12819                                                      346145   -1.29    0.00  1.0000
   5  -3   0  334788   12799                                                      333207   -1.29    0.00  1.0000
  -3  -5   0  344467   12769                                                      342866    1.28    0.00  1.0000
   3   5   0  342622   12759                                                      341026    1.28    0.00  1.0000
  -3  -5   0  340267   12749                                                      338676    1.28    0.00  1.0000
  -5   3   0  354010   12809                                                      352385   -1.29    0.00  1.0000
  -3  -5   0  339826   12779                                                      338236    1.28    0.00  1.0000
  -5   3   0  347225   12799                                                      345615   -1.29    0.00  1.0000
  -3  -5   0  325594   12789                                                      324038    1.28    0.00  1.0000
   3   5   0  348064   12759                                                      346455    1.28    0.00  1.0000
  -3  -5   0  336608   12739                                                      335026    1.28    0.00  1.0000
  -5   3   0  342304   12819                                                      340706   -1.29    0.00  1.0000
  -5   3   0  342234   12799                                                      340636   -1.29    0.00  1.0000
   5  -3   0  335800   12749                                                      334217   -1.29    0.00  1.0000
   3   5   0  338984   12769                                                      337396    1.28    0.00  1.0000
   3   5   0  342983   12769                                                      341386    1.28    0.00  1.0000
   5  -3   0  355093   12789                                                      353465   -1.29    0.00  1.0000
   5  -3   0  328493   12829                                                      326927   -1.29    0.00  1.0000
  -5   3   0  342414   12779                                                      340816   -1.29    0.00  1.0000
   5   5   0   60909    2320                                                       60684    0.43    0.00  1.0000
   5  -5   0   58176    2450                                                       57964   -0.41    0.00  1.0000
   5  -5   0   61803    2420                                                       61584   -0.41    0.00  1.0000
  -5   5   0   65418    2430                                                       65193   -0.41    0.00  1.0000
  -5   5   0   62073    2430                                                       61854   -0.41    0.00  1.0000
   5  -5   0   59138    2430                                                       58924   -0.41    0.00  1.0000
  -5  -5   0   59225    2330                                                       59004    0.43    0.00  1.0000
   5   5   0   60969    2320                                                       60744    0.43    0.00  1.0000
   5   5   0   61229    2350                                                       61004    0.43    0.00  1.0000
  -5   5   0   60861    2440                                                       60644   -0.41    0.00  1.0000
  -5   5   0   60000    2440                                                       59784   -0.41    0.00  1.0000
   5  -5   0   64928    2420                                                       64704   -0.41    0.00  1.0000
   5   5   0   61490    2330                                                       61264    0.43    0.00  1.0000
  -5   5   0   57766    2380                                                       57554   -0.41    0.00  1.0000
   5   5   0   60899    2340                                                       60674    0.43    0.00  1.0000
   5  -5   0   61823    2380                                                       61604   -0.41    0.00  1.0000
  -5   5   0   67492    2480                                                       67263   -0.41    0.00  1.0000
  -5  -5   0   63403    2360                                                       63174    0.43    0.00  1.0000
  -5  -5   0   62792    2380                                                       62564    0.43    0.00  1.0000
   5  -5   0   66550    2440                                                       66323   -0.41    0.00  1.0000
   5  -5   0   61833    2450                                                       61614   -0.41    0.00  1.0000
   5   5   0   62211    2330                                                       61984    0.43    0.00  1.0000
   5   5   0   62492    2340                                                       62264    0.43    0.00  1.0000
   5  -5   0   62474    2440                                                       62254   -0.41    0.00  1.0000
  -5  -5   0   62952    2320                                                       62724    0.43    0.00  1.0000
   5   5   0   62502    2340                                                       62274    0.43    0.00  1.0000
  -5  -5   0   60939    2330                                                       60714    0.43    0.00  1.0000
  -5  -5   0   61079    2340                                                       60854    0.43    0.00  1.0000
  -5   5   0   63686    2420                                                       63464   -0.41    0.00  1.0000
  -5   5   0   62284    2430                                                       62064   -0.41    0.00  1.0000
  -5   5   0   63276    2390                                                       63054   -0.41    0.00  1.0000
   4  -6   0  175211    6989                                                      179792   -5.12    0.00  1.0000
  -6  -4   0  180629    6909                                                      185271   -5.11    0.00  1.0000
  -6  -4   0  179208    6909                                                      183832   -5.11    0.00  1.0000
   6   4   0  177806    6889                                                      182412   -5.11    0.00  1.0000
  -4   6   0  181697    6929                                                      186361   -5.12    0.00  1.0000
  -4   6   0  177817    6989                                                      182432   -5.12    0.00  1.0000
   6   4   0  170384    6879                                                      174893   -5.11    0.00  1.0000
  -6  -4   0  175111    6899                                                      179682   -5.11    0.00  1.0000
  -6  -4   0  179317    6879                                                      183942   -5.11    0.00  1.0000
  -4   6   0  181973    6979                                                      186641   -5.12    0.00  1.0000
  -4   6   0  174431    6999                                                      179002   -5.12    0.00  1.0000
  -4   6   0  179782    7019                                                      184422   -5.12    0.00  1.0000
   4  -6   0  177827    6989                                                      182442   -5.12    0.00  1.0000
   4  -6   0  179180    6969                                                      183812   -5.12    0.00  1.0000
   4  -6   0  176939    7019                                                      181542   -5.12    0.00  1.0000
  -6  -4   0  175062    6889                                                      179632   -5.11    0.00  1.0000
  -4   6   0  181815    6979                                                      186481   -5.12    0.00  1.0000
   6   4   0  185399    6899                                                      190101   -5.11    0.00  1.0000
   4  -6   0  182625    6999                                                      187301   -5.12    0.00  1.0000
  -4   6   0  192530    6989                                                      197330   -5.12    0.00  1.0000
   4  -6   0  177778    6969                                                      182392   -5.12    0.00  1.0000
   4  -6   0  179595    6959                                                      184232   -5.12    0.00  1.0000
   4  -6   0  171707    6939                                                      176242   -5.12    0.00  1.0000
   4  -6   0  177008    6979                                                      181612   -5.12    0.00  1.0000
  -4   6   0  175537    6999                                                      180122   -5.12    0.00  1.0000
  -4   6   0  178617    6939                                                      183242   -5.12    0.00  1.0000
  -4   6   0  176228    6949                                                      180822   -5.12    0.00  1.0000
   6   4   0  187473    6889                                                      192201   -5.11    0.00  1.0000
  -2   6   0    1272      90                                                         550   11.50    0.00  1.0000
   6   2   0    1273      50                                                         550   11.50    0.00  1.0000
  -6  -2   0    1196      60                                                         500   11.50    0.00  1.0000
   2  -6   0    1272      90                                                         550   11.50    0.00  1.0000
  -2   6   0    1272     130                                                         550   11.50    0.00  1.0000
  -2   6   0    1740     100                                                         870   11.50    0.00  1.0000
   6   2   0    1363     110                                                         610   11.50    0.00  1.0000
   2  -6   0    1211     120                                                         510   11.50    0.00  1.0000
   6   2   0    1333      70                                                         590   11.50    0.00  1.0000
   6   2   0    1627      80                                                         790   11.50    0.00  1.0000
  -6  -2   0    1165     100                                                         480   11.50    0.00  1.0000
   6   2   0    1348      70                                                         600   11.50    0.00  1.0000
  -2   6   0    1348     140                                                         600   11.50    0.00  1.0000
  -2   6   0    1407     150                                                         640   11.50    0.00  1.0000
  -2   6   0    1165     140                                                         480   11.50    0.00  1.0000
  -2   6   0    1149     100                                                         470   11.50    0.00  1.0000
  -6  -2   0    1318      60                                                         580   11.50    0.00  1.0000
  -6  -2   0    1438      90                                                         660   11.50    0.00  1.0000
   6   2   0    1181      90                                                         490   11.50    0.00  1.0000
  -2   6   0    1554     170                                                         740   11.50    0.00  1.0000
   2  -6   0    1378     120                                                         620   11.50    0.00  1.0000
  -2   6   0    1006     100                                                         380   11.50    0.00  1.0000
   6   2   0    1288      70                                                         560   11.50    0.00  1.0000
   2  -6   0    1149     140                                                         470   11.50    0.00  1.0000
   2  -6   0    1149     130                                                         470   11.50    0.00  1.0000
  -6  -2   0    1273      90                                                         550   11.50    0.00  1.0000
   6   2   0    1496      60                                                         700   11.50    0.00  1.0000
   2  -6   0    1211     110                                                         510   11.50    0.00  1.0000
  -2   6   0    1669     140                                                         820   11.50    0.00  1.0000
  -6  -2   0    1102      70                                                         440   11.50    0.00  1.0000
   2  -6   0    1196     130                                                         500   11.50    0.00  1.0000
   2  -6   0    1226     150                                                         520   11.50    0.00  1.0000
   2  -6   0     855     100                                                         290   11.50    0.00  1.0000
   0  -6   0     878     100                                                         880  -12.07    0.00  1.0000
  -6   0   0     635      60                                                         610  -12.07    0.00  1.0000
  -6   0   0     831     100                                                         830  -12.07    0.00  1.0000
  -6   0   0     858     130                                                         860  -12.07    0.00  1.0000
   0   6   0     653     140                                                         630  -12.07    0.00  1.0000
   0   6   0     968     150                                                         980  -12.07    0.00  1.0000
   6   0   0     715      90                                                         700  -12.07    0.00  1.0000
   0  -6   0     680      90                                                         660  -12.07    0.00  1.0000
   6   0   0     732     110                                                         720  -12.07    0.00  1.0000
   0  -6   0     662      90                                                         640  -12.07    0.00  1.0000
   0  -6   0     644     110                                                         620  -12.07    0.00  1.0000
   6   0   0     706      50                                                         690  -12.07    0.00  1.0000
   0   6   0     618      90                                                         590  -12.07    0.00  1.0000
  -6   0   0     599     100                                                         570  -12.07    0.00  1.0000
  -6   0   0     643     130                                                         620  -12.07    0.00  1.0000
   0  -6   0     716     100                                                         700  -12.07    0.00  1.0000
   0  -6   0     583     100                                                         550  -12.07    0.00  1.0000
   0  -6   0     627     120                                                         600  -12.07    0.00  1.0000
   0  -6   0     733     130                                                         720  -12.07    0.00  1.0000
  -6   0   0     840     110                                                         840  -12.07    0.00  1.0000
   6   0   0     564      90                                                         530  -12.07    0.00  1.0000
   0   6   0     896     140                                                         900  -12.07    0.00  1.0000
   6   0   0     795     110                                                         790  -12.07    0.00  1.0000
   6   0   0     643      70                                                         620  -12.07    0.00  1.0000
   6   0   0     768     110                                                         760  -12.07    0.00  1.0000
   0   6   0     680      80                                                         660  -12.07    0.00  1.0000
   0   6   0     680      80                                                         660  -12.07    0.00  1.0000
   0   6   0     689     110                                                         670  -12.07    0.00  1.0000
  -6   0   0     635      70                                                         610  -12.07    0.00  1.0000
   0   6   0     384     110                                                         320  -12.07    0.00  1.0000
   0  -6   0     698     130                                                         680  -12.07    0.00  1.0000
   6   0   0     670      60                                                         650  -12.07    0.00  1.0000
   0  -6   0     707     100                                                         690  -12.07    0.00  1.0000
   6   0   0     697     100                                                         680  -12.07    0.00  1.0000
   6   0   0     777     110                                                         770  -12.07    0.00  1.0000
  -6   0   0     626      50                                                         600  -12.07    0.00  1.0000
   0   6   0     547      80                                                         510  -12.07    0.00  1.0000
   0   6   0     959     130                                                         970  -12.07    0.00  1.0000
   0  -6   0     805     150                                                         800  -12.07    0.00  1.0000
  -2  -6   0    1451     100                                                         670   11.49    0.00  1.0000
   2   6   0    2330     140                                                        1300   11.49    0.00  1.0000
   2   6   0    1257      50                                                         540   11.49    0.00  1.0000
   2   6   0    1347     100                                                         600   11.49    0.00  1.0000
  -2  -6   0    1211      70                                                         510   11.49    0.00  1.0000
   6  -2   0    1347      80                                                         600   11.49    0.00  1.0000
   2   6   0    1287     100                                                         560   11.49    0.00  1.0000
   2   6   0     973      80                                                         360   11.49    0.00  1.0000
  -2  -6   0    1287      80                                                         560   11.49    0.00  1.0000
  -2  -6   0    1133      80                                                         460   11.49    0.00  1.0000
   2   6   0    1195      70                                                         500   11.49    0.00  1.0000
   6  -2   0    1481     130                                                         690   11.49    0.00  1.0000
  -6   2   0    1332     160                                                         590   11.49    0.00  1.0000
   2   6   0    1377      60                                                         620   11.49    0.00  1.0000
  -2  -6   0    1481      80                                                         690   11.49    0.00  1.0000
  -2  -6   0    1133      90                                                         460   11.49    0.00  1.0000
  -6   2   0    1086     100                                                         430   11.49    0.00  1.0000
   2   6   0    1347     110                                                         600   11.49    0.00  1.0000
  -2  -6   0    1054     120                                                         410   11.49    0.00  1.0000
   6  -2   0    1054     100                                                         410   11.49    0.00  1.0000
  -6   2   0    1347      90                                                         600   11.49    0.00  1.0000
   6  -2   0    1611     140                                                         780   11.49    0.00  1.0000
   6  -2   0    1054     120                                                         410   11.49    0.00  1.0000
   6  -2   0    1164     120                                                         480   11.49    0.00  1.0000
  -6   2   0    1287      90                                                         560   11.49    0.00  1.0000
  -2  -6   0    1241     120                                                         530   11.49    0.00  1.0000
  -2  -6   0    1226      70                                                         520   11.49    0.00  1.0000
   2   6   0    1102      70                                                         440   11.49    0.00  1.0000
  -2  -6   0    1272      60                                                         550   11.49    0.00  1.0000
   6  -2   0    1611      80                                                         780   11.49    0.00  1.0000
   2   6   0     989      90                                                         370   11.49    0.00  1.0000
   2   6   0    1332     140                                                         590   11.49    0.00  1.0000
   6  -2   0    1407     110                                                         640   11.49    0.00  1.0000
  -6   2   0    1377      90                                                         620   11.49    0.00  1.0000
  -6   2   0    1287     110                                                         560   11.49    0.00  1.0000
  -6   2   0    1021     120                                                         390   11.49    0.00  1.0000
   6  -2   0     956     100                                                         350   11.49    0.00  1.0000
  -6   2   0    1070     120                                                         420   11.49    0.00  1.0000
  -2  -6   0    1164      70                                                         480   11.49    0.00  1.0000
  -6   2   0    1422     130                                                         650   11.49    0.00  1.0000
  -6   2   0    1287     140                                                         560   11.49    0.00  1.0000
  -2  -6   0    1241     110                                                         530   11.49    0.00  1.0000
   6  -2   0    1211     110                                                         510   11.49    0.00  1.0000
  -4  -6   0  178831    6809                                                      183452   -5.11    0.00  1.0000
   4   6   0  178811    6829                                                      183432   -5.11    0.00  1.0000
   4   6   0  177389    6819                                                      181992   -5.11    0.00  1.0000
   4   6   0  179394    6829                                                      184022   -5.11    0.00  1.0000
   6  -4   0  172942    6839                                                      177492   -5.11    0.00  1.0000
   6  -4   0  176752    6919                                                      181352   -5.11    0.00  1.0000
  -6   4   0  170988    6879                                                      175512   -5.11    0.00  1.0000
   6  -4   0  177118    6869                                                      181722   -5.11    0.00  1.0000
  -6   4   0  181974    6929                                                      186641   -5.11    0.00  1.0000
  -6   4   0  171570    6879                                                      176102   -5.11    0.00  1.0000
   6  -4   0  174482    6889                                                      179052   -5.11    0.00  1.0000
   6  -4   0  173070    6869                                                      177622   -5.11    0.00  1.0000
  -4  -6   0  176303    6809                                                      180892   -5.11    0.00  1.0000
  -4  -6   0  175642    6819                                                      180222   -5.11    0.00  1.0000
   4   6   0  174803    6799                                                      179372   -5.11    0.00  1.0000
   6  -4   0  178638    6899                                                      183262   -5.11    0.00  1.0000
   4   6   0  177389    6829                                                      181992   -5.11    0.00  1.0000
  -4  -6   0  182760    6799                                                      187431   -5.11    0.00  1.0000
  -6   4   0  179290    6869                                                      183922   -5.11    0.00  1.0000
  -6   4   0  178569    6849                                                      183192   -5.11    0.00  1.0000
  -4  -6   0  175296    6789                                                      179872   -5.11    0.00  1.0000
   6  -4   0  178905    6899                                                      183532   -5.11    0.00  1.0000
   4   6   0  173766    6799                                                      178322   -5.11    0.00  1.0000
   4   6   0  175681    6809                                                      180262   -5.11    0.00  1.0000
   6  -4   0  178826    6899                                                      183452   -5.11    0.00  1.0000
  -4  -6   0  176313    6809                                                      180902   -5.11    0.00  1.0000
   6  -4   0  173120    6869                                                      177672   -5.11    0.00  1.0000
  -6   4   0  178312    6889                                                      182932   -5.11    0.00  1.0000
  -6   4   0  177621    6839                                                      182232   -5.11    0.00  1.0000
  -4  -6   0  172157    6849                                                      176692   -5.11    0.00  1.0000
  -6   4   0  183653    6899                                                      188341   -5.11    0.00  1.0000
  -4  -6   0  177705    6789                                                      182312   -5.11    0.00  1.0000
   4   6   0  178801    6819                                                      183422   -5.11    0.00  1.0000
   4   6   0  173381    6849                                                      177932   -5.11    0.00  1.0000
   4   6   0  176412    6789                                                      181002   -5.11    0.00  1.0000
  -6   4   0  175282    6899                                                      179862   -5.11    0.00  1.0000
   6  -4   0  173613    6829                                                      178172   -5.11    0.00  1.0000
  -6   4   0  174719    6889                                                      179292   -5.11    0.00  1.0000
   6   6   0   31356    1280                                                       32837   -3.89    0.00  1.0000
   6  -6   0   33050    1400                                                       34567   -3.88    0.00  1.0000
  -6   6   0   31554    1400                                                       33037   -3.88    0.00  1.0000
   6  -6   0   35700    1420                                                       37276   -3.88    0.00  1.0000
   6   6   0   30790    1280                                                       32257   -3.89    0.00  1.0000
  -6  -6   0   31307    1270                                                       32787   -3.89    0.00  1.0000
  -6   6   0   37109    1470                                                       38716   -3.88    0.00  1.0000
   6  -6   0   25785    1360                                                       27127   -3.88    0.00  1.0000
   6  -6   0   29630    1350                                                       31067   -3.88    0.00  1.0000
  -6   6   0   31984    1380                                                       33477   -3.88    0.00  1.0000
  -6   6   0   33021    1400                                                       34537   -3.88    0.00  1.0000
   6  -6   0   28751    1410                                                       30167   -3.88    0.00  1.0000
  -6   6   0   35426    1400                                                       36996   -3.88    0.00  1.0000
  -6   6   0   32434    1370                                                       33937   -3.88    0.00  1.0000
   6  -6   0   31926    1400                                                       33417   -3.88    0.00  1.0000
  -6  -6   0   31552    1270                                                       33037   -3.89    0.00  1.0000
   6  -6   0   34037    1420                                                       35576   -3.88    0.00  1.0000
  -6   6   0   29737    1380                                                       31177   -3.88    0.00  1.0000
  -6  -6   0   35854    1310                                                       37436   -3.89    0.00  1.0000
   6  -6   0   31877    1370                                                       33367   -3.88    0.00  1.0000
  -6   6   0   28429    1320                                                       29837   -3.88    0.00  1.0000
   6   6   0   32216    1290                                                       33717   -3.89    0.00  1.0000
   6  -6   0   28800    1320                                                       30217   -3.88    0.00  1.0000
   6   6   0   31581    1270                                                       33067   -3.89    0.00  1.0000
  -6   6   0   28507    1320                                                       29917   -3.88    0.00  1.0000
   5  -7   0   21898     970                                                       22568   -2.12    0.00  1.0000
  -5   7   0   22183    1030                                                       22858   -2.12    0.00  1.0000
  -5   7   0   23632    1010                                                       24328   -2.12    0.00  1.0000
  -5   7   0   23208     980                                                       23898   -2.12    0.00  1.0000
   5  -7   0   21514     940                                                       22178   -2.12    0.00  1.0000
   5  -7   0   21435     990                                                       22098   -2.12    0.00  1.0000
  -7  -5   0   21387     910                                                       22048    2.11    0.00  1.0000
  -7  -5   0   20826     880                                                       21478    2.11    0.00  1.0000
  -5   7   0   21986     960                                                       22658   -2.12    0.00  1.0000
   5  -7   0   23681    1000                                                       24378   -2.12    0.00  1.0000
   5  -7   0   21317    1010                                                       21978   -2.12    0.00  1.0000
  -5   7   0   21129     930                                                       21788   -2.12    0.00  1.0000
  -7  -5   0   21318     920                                                       21978    2.11    0.00  1.0000
   7   5   0   21663     900                                                       22328    2.11    0.00  1.0000
   7   5   0   22195     880                                                       22868    2.11    0.00  1.0000
   5  -7   0   23129    1030                                                       23818   -2.12    0.00  1.0000
   7   5   0   21466     880                                                       22128    2.11    0.00  1.0000
  -5   7   0   20903     990                                                       21558   -2.12    0.00  1.0000
   5  -7   0   21809    1030                                                       22478   -2.12    0.00  1.0000
   5  -7   0   21051     970                                                       21708   -2.12    0.00  1.0000
  -5   7   0   21651     990                                                       22318   -2.12    0.00  1.0000
   7   5   0   21446     870                                                       22108    2.11    0.00  1.0000
  -7  -5   0   21653     870                                                       22318    2.11    0.00  1.0000
  -5   7   0   22144     940                                                       22818   -2.12    0.00  1.0000
  -7  -5   0   21751     900                                                       22418    2.11    0.00  1.0000
  -5   7   0   20755    1040                                                       21408   -2.12    0.00  1.0000
   5  -7   0   22627    1020                                                       23308   -2.12    0.00  1.0000
  -5   7   0   22311    1020                                                       22988   -2.12    0.00  1.0000
   3  -7   0   11644     690                                                       15338   15.02    0.00  1.0000
   3  -7   0   11426     700                                                       15088   15.02    0.00  1.0000
   3  -7   0   11374     750                                                       15028   15.02    0.00  1.0000
  -7  -3   0   11844     650                                                       15568  -15.02    0.00  1.0000
  -3   7   0   11149     660                                                       14769   15.02    0.00  1.0000
   3  -7   0   11914     730                                                       15648   15.02    0.00  1.0000
  -7  -3   0   11122     620                                                       14739  -15.02    0.00  1.0000
  -7  -3   0   11469     600                                                       15138  -15.02    0.00  1.0000
   3  -7   0   11435     700                                                       15098   15.02    0.00  1.0000
  -3   7   0   10386     700                                                       13889   15.02    0.00  1.0000
  -3   7   0   12683     740                                                       16528   15.02    0.00  1.0000
  -3   7   0   12859     730                                                       16728   15.02    0.00  1.0000
  -3   7   0   11331     740                                                       14979   15.02    0.00  1.0000
   3  -7   0   11801     660                                                       15518   15.02    0.00  1.0000
   7   3   0   11931     610                                                       15668  -15.02    0.00  1.0000
  -3   7   0   12062     770                                                       15818   15.02    0.00  1.0000
   3  -7   0   12298     740                                                       16088   15.02    0.00  1.0000
   3  -7   0   11748     720                                                       15458   15.02    0.00  1.0000
  -3   7   0   12465     660                                                       16278   15.02    0.00  1.0000
  -3   7   0   11609     710                                                       15298   15.02    0.00  1.0000
   7   3   0   12010     640                                                       15758  -15.02    0.00  1.0000
   3  -7   0   11435     690                                                       15098   15.02    0.00  1.0000
   7   3   0   11731     620                                                       15438  -15.02    0.00  1.0000
  -3   7   0   11383     670                                                       15038   15.02    0.00  1.0000
   7   3   0   11940     640                                                       15678  -15.02    0.00  1.0000
  -7  -3   0   11748     620                                                       15458  -15.02    0.00  1.0000
   7   1   0   21262    1050                                                       28277   21.08    0.00  1.0000
   1  -7   0   20080    1110                                                       26907  -21.07    0.00  1.0000
   1  -7   0   19596    1140                                                       26347  -21.07    0.00  1.0000
  -7  -1   0   20560    1030                                                       27467   21.08    0.00  1.0000
  -7  -1   0   19119    1050                                                       25797   21.08    0.00  1.0000
   7   1   0   20335    1070                                                       27207   21.08    0.00  1.0000
  -7  -1   0   20725    1090                                                       27657   21.08    0.00  1.0000
  -7  -1   0   19067    1050                                                       25737   21.08    0.00  1.0000
   7   1   0   19386    1030                                                       26107   21.08    0.00  1.0000
  -1   7   0   19881    1120                                                       26677  -21.07    0.00  1.0000
   7   1   0   19593    1060                                                       26347   21.08    0.00  1.0000
   1  -7   0   20668    1110                                                       27587  -21.07    0.00  1.0000
   1  -7   0   21092    1070                                                       28077  -21.07    0.00  1.0000
   1  -7   0   19985    1120                                                       26797  -21.07    0.00  1.0000
   1  -7   0   20789    1150                                                       27727  -21.07    0.00  1.0000
  -1   7   0   21023    1070                                                       27997  -21.07    0.00  1.0000
  -7  -1   0   20551    1080                                                       27457   21.08    0.00  1.0000
  -1   7   0   19709    1070                                                       26477  -21.07    0.00  1.0000
  -1   7   0   19803    1080                                                       26587  -21.07    0.00  1.0000
   7   1   0   18869    1040                                                       25507   21.08    0.00  1.0000
  -7  -1   0   19463    1040                                                       26197   21.08    0.00  1.0000
   7   1   0   19283    1060                                                       25987   21.08    0.00  1.0000
   1  -7   0   19140    1070                                                       25817  -21.07    0.00  1.0000
  -7  -1   0   20067    1060                                                       26897   21.08    0.00  1.0000
   7   1   0   19369    1050                                                       26087   21.08    0.00  1.0000
   1  -7   0   19691    1090                                                       26457  -21.07    0.00  1.0000
  -1   7   0   20382    1150                                                       27257  -21.07    0.00  1.0000
   7   1   0   20353    1060                                                       27227   21.08    0.00  1.0000
   1  -7   0   19993    1090                                                       26807  -21.07    0.00  1.0000
  -1   7   0   20348    1110                                                       27217  -21.07    0.00  1.0000
  -1   7   0   18942    1140                                                       25587  -21.07    0.00  1.0000
   1  -7   0   19648    1100                                                       26407  -21.07    0.00  1.0000
  -7  -1   0   19645    1090                                                       26407   21.08    0.00  1.0000
  -1   7   0   19674    1070                                                       26437  -21.07    0.00  1.0000
  -1   7   0   19183    1120                                                       25867  -21.07    0.00  1.0000
   1  -7   0   20953    1100                                                       27917  -21.07    0.00  1.0000
  -1  -7   0   19794    1070                                                       26577   21.07    0.00  1.0000
  -1  -7   0   19924    1070                                                       26727   21.07    0.00  1.0000
   1   7   0   19846    1050                                                       26637   21.07    0.00  1.0000
   7  -1   0   19941    1080                                                       26747  -21.08    0.00  1.0000
   1   7   0   19251    1060                                                       25947   21.07    0.00  1.0000
  -7   1   0   19001    1080                                                       25657  -21.08    0.00  1.0000
   1   7   0   20243    1110                                                       27097   21.07    0.00  1.0000
  -1  -7   0   20053    1120                                                       26877   21.07    0.00  1.0000
   7  -1   0   19949    1100                                                       26757  -21.08    0.00  1.0000
  -1  -7   0   20114    1050                                                       26947   21.07    0.00  1.0000
  -1  -7   0   19579    1090                                                       26327   21.07    0.00  1.0000
  -1  -7   0   19096    1060                                                       25767   21.07    0.00  1.0000
  -7   1   0   19483    1050                                                       26217  -21.08    0.00  1.0000
  -7   1   0   21143    1100                                                       28137  -21.08    0.00  1.0000
  -1  -7   0   20719    1100                                                       27647   21.07    0.00  1.0000
  -1  -7   0   19881    1100                                                       26677   21.07    0.00  1.0000
   7  -1   0   20866    1090                                                       27817  -21.08    0.00  1.0000
  -7   1   0   19544    1040                                                       26287  -21.08    0.00  1.0000
  -7   1   0   19923    1060                                                       26727  -21.08    0.00  1.0000
   7  -1   0   19570    1100                                                       26317  -21.08    0.00  1.0000
  -7   1   0   19389    1100                                                       26107  -21.08    0.00  1.0000
  -1  -7   0   18512    1060                                                       25087   21.07    0.00  1.0000
   1   7   0   18409    1090                                                       24968   21.07    0.00  1.0000
  -7   1   0   20001    1110                                                       26817  -21.08    0.00  1.0000
  -7   1   0   21195    1130                                                       28197  -21.08    0.00  1.0000
  -1  -7   0   20988    1060                                                       27957   21.07    0.00  1.0000
   7  -1   0   19182    1090                                                       25867  -21.08    0.00  1.0000
  -1  -7   0   19725    1060                                                       26497   21.07    0.00  1.0000
   1   7   0   20468    1130                                                       27357   21.07    0.00  1.0000
   1   7   0   19829    1090                                                       26617   21.07    0.00  1.0000
  -7   1   0   20070    1080                                                       26897  -21.08    0.00  1.0000
   7  -1   0   20329    1050                                                       27197  -21.08    0.00  1.0000
  -1  -7   0   19674    1120                                                       26437   21.07    0.00  1.0000
  -1  -7   0   19976    1080                                                       26787   21.07    0.00  1.0000
   1   7   0   20339    1040                                                       27207   21.07    0.00  1.0000
   7  -1   0   19156    1090                                                       25837  -21.08    0.00  1.0000
   1   7   0   20045    1060                                                       26867   21.07    0.00  1.0000
   1   7   0   19846    1130                                                       26637   21.07    0.00  1.0000
   1   7   0   20866    1110                                                       27817   21.07    0.00  1.0000
   7  -1   0   20183    1030                                                       27027  -21.08    0.00  1.0000
   7  -1   0   20286    1060                                                       27147  -21.08    0.00  1.0000
   1   7   0   20788    1090                                                       27727   21.07    0.00  1.0000
   7  -1   0   20018    1080                                                       26837  -21.08    0.00  1.0000
   7  -3   0   12037     650                                                       15788   15.02    0.00  1.0000
  -7   3   0   12605     720                                                       16438   15.02    0.00  1.0000
  -7   3   0   12465     710                                                       16278   15.02    0.00  1.0000
   3   7   0   11113     620                                                       14729  -15.02    0.00  1.0000
   7  -3   0   10915     720                                                       14499   15.02    0.00  1.0000
   3   7   0   11660     590                                                       15358  -15.02    0.00  1.0000
  -3  -7   0   11948     640                                                       15688  -15.02    0.00  1.0000
   3   7   0   12053     670                                                       15808  -15.02    0.00  1.0000
  -3  -7   0   11486     680                                                       15158  -15.02    0.00  1.0000
   7  -3   0   12561     690                                                       16388   15.02    0.00  1.0000
  -7   3   0   11426     660                                                       15088   15.02    0.00  1.0000
   7  -3   0   12833     710                                                       16698   15.02    0.00  1.0000
  -3  -7   0   12018     620                                                       15768  -15.02    0.00  1.0000
  -3  -7   0   12490     650                                                       16308  -15.02    0.00  1.0000
   7  -3   0   12430     720                                                       16238   15.02    0.00  1.0000
   7  -3   0   12124     690                                                       15888   15.02    0.00  1.0000
   7  -3   0   11409     680                                                       15068   15.02    0.00  1.0000
   3   7   0   11078     630                                                       14689  -15.02    0.00  1.0000
   3   7   0   12105     710                                                       15868  -15.02    0.00  1.0000
   7  -3   0   11253     700                                                       14889   15.02    0.00  1.0000
  -7   3   0   11801     650                                                       15518   15.02    0.00  1.0000
  -7   3   0   12141     700                                                       15908   15.02    0.00  1.0000
  -3  -7   0   11139     630                                                       14759  -15.02    0.00  1.0000
  -3  -7   0   11695     650                                                       15398  -15.02    0.00  1.0000
   3   7   0   11869     660                                                       15598  -15.02    0.00  1.0000
   7  -3   0   12404     690                                                       16208   15.02    0.00  1.0000
   3   7   0   11287     640                                                       14929  -15.02    0.00  1.0000
  -3  -7   0   11957     640                                                       15698  -15.02    0.00  1.0000
  -7   3   0   11705     710                                                       15408   15.02    0.00  1.0000
  -7   3   0   12080     650                                                       15838   15.02    0.00  1.0000
  -7   3   0   12203     690                                                       15978   15.02    0.00  1.0000
  -7   3   0   11010     670                                                       14609   15.02    0.00  1.0000
   3   7   0   10619     620                                                       14159  -15.02    0.00  1.0000
   7  -3   0   12089     630                                                       15848   15.02    0.00  1.0000
  -3  -7   0   12464     590                                                       16278  -15.02    0.00  1.0000
   3   7   0   11852     650                                                       15578  -15.02    0.00  1.0000
   3   7   0   10757     670                                                       14319  -15.02    0.00  1.0000
  -3  -7   0    9231     610                                                       12549  -15.02    0.00  1.0000
   3   7   0   11434     590                                                       15098  -15.02    0.00  1.0000
  -3  -7   0   12437     700                                                       16248  -15.02    0.00  1.0000
  -7   3   0   12517     750                                                       16338   15.02    0.00  1.0000
  -7   5   0   20468     970                                                       21118   -2.12    0.00  1.0000
  -5  -7   0   19927     930                                                       20568    2.12    0.00  1.0000
   7  -5   0   21817     910                                                       22488   -2.12    0.00  1.0000
   7  -5   0   21098     970                                                       21758   -2.12    0.00  1.0000
  -5  -7   0   21985     890                                                       22658    2.12    0.00  1.0000
  -7   5   0   22033     980                                                       22708   -2.12    0.00  1.0000
  -7   5   0   21433     920                                                       22098   -2.12    0.00  1.0000
  -7   5   0   21787     990                                                       22458   -2.12    0.00  1.0000
  -5  -7   0   21600     880                                                       22268    2.12    0.00  1.0000
   7  -5   0   21147     990                                                       21808   -2.12    0.00  1.0000
  -5  -7   0   21226     860                                                       21888    2.12    0.00  1.0000
   7  -5   0   24397    1000                                                       25107   -2.12    0.00  1.0000
   5   7   0   21207     880                                                       21868    2.12    0.00  1.0000
   5   7   0   22201     890                                                       22878    2.12    0.00  1.0000
   5   7   0   21994     900                                                       22668    2.12    0.00  1.0000
   7  -5   0   21305    1010                                                       21968   -2.12    0.00  1.0000
   7  -5   0   21275     960                                                       21938   -2.12    0.00  1.0000
   7  -5   0   21708     920                                                       22378   -2.12    0.00  1.0000
   5   7   0   22162     900                                                       22838    2.12    0.00  1.0000
  -7   5   0   22359     930                                                       23038   -2.12    0.00  1.0000
   5   7   0   20645     890                                                       21298    2.12    0.00  1.0000
  -7   5   0   22171    1000                                                       22848   -2.12    0.00  1.0000
   5   7   0   21216     860                                                       21878    2.12    0.00  1.0000
   5   7   0   21098     860                                                       21758    2.12    0.00  1.0000
   7  -5   0   20911     990                                                       21568   -2.12    0.00  1.0000
  -7   5   0   21827     980                                                       22498   -2.12    0.00  1.0000
  -5  -7   0   21679     880                                                       22348    2.12    0.00  1.0000
  -7   5   0   22240     960                                                       22918   -2.12    0.00  1.0000
   5   7   0   21699     870                                                       22368    2.12    0.00  1.0000
  -5  -7   0   21581     880                                                       22248    2.12    0.00  1.0000
  -7   5   0   22487     950                                                       23168   -2.12    0.00  1.0000
  -5  -7   0   21354     860                                                       22018    2.12    0.00  1.0000
   5   7   0   21433     900                                                       22098    2.12    0.00  1.0000
   7  -5   0   21797    1000                                                       22468   -2.12    0.00  1.0000
  -7   5   0   21965    1040                                                       22638   -2.12    0.00  1.0000
   5   7   0   21423     930                                                       22088    2.12    0.00  1.0000
   7  -7   0   12108     640                                                       13149   -4.36    0.00  1.0000
   7  -7   0   11907     750                                                       12939   -4.36    0.00  1.0000
  -7   7   0   11609     710                                                       12629   -4.36    0.00  1.0000
   7  -7   0   11561     650                                                       12579   -4.36    0.00  1.0000
   7  -7   0   14424     710                                                       15558   -4.36    0.00  1.0000
   7   7   0   14050     610                                                       15168    4.35    0.00  1.0000
  -7   7   0   15407     730                                                       16578   -4.36    0.00  1.0000
  -7  -7   0   14483     600                                                       15618    4.35    0.00  1.0000
   7  -7   0   16091     790                                                       17288   -4.36    0.00  1.0000
  -7   7   0   11514     700                                                       12529   -4.36    0.00  1.0000
  -7   7   0   12031     660                                                       13069   -4.36    0.00  1.0000
   7   7   0   14233     610                                                       15358    4.35    0.00  1.0000
  -7   7   0   11677     650                                                       12699   -4.36    0.00  1.0000
   7   7   0   14656     630                                                       15798    4.35    0.00  1.0000
   7  -7   0   14703     740                                                       15848   -4.36    0.00  1.0000
   7  -7   0   13923     740                                                       15038   -4.36    0.00  1.0000
  -7   7   0   17163     840                                                       18398   -4.36    0.00  1.0000
  -7   7   0   13367     730                                                       14459   -4.36    0.00  1.0000
   7  -7   0   15580     780                                                       16758   -4.36    0.00  1.0000
   7   7   0   13743     610                                                       14849    4.35    0.00  1.0000
   7  -7   0   16429     780                                                       17638   -4.36    0.00  1.0000
  -7   7   0   13299     760                                                       14389   -4.36    0.00  1.0000
  -7  -7   0   14204     590                                                       15328    4.35    0.00  1.0000
   6  -8   0   29896    1300                                                       29217   -1.86    0.00  1.0000
   8   6   0   29241    1140                                                       28567   -1.87    0.00  1.0000
   6  -8   0   29178    1190                                                       28507   -1.86    0.00  1.0000
  -6   8   0   30968    1270                                                       30277   -1.86    0.00  1.0000
   6  -8   0   29593    1260                                                       28917   -1.86    0.00  1.0000
   6  -8   0   29542    1280                                                       28867   -1.86    0.00  1.0000
  -6   8   0   30645    1220                                                       29957   -1.86    0.00  1.0000
  -8  -6   0   29322    1140                                                       28647   -1.87    0.00  1.0000
   6  -8   0   29107    1260                                                       28437   -1.86    0.00  1.0000
   6  -8   0   28753    1230                                                       28087   -1.86    0.00  1.0000
  -6   8   0   29350    1180                                                       28677   -1.86    0.00  1.0000
  -8  -6   0   28725    1110                                                       28057   -1.87    0.00  1.0000
  -6   8   0   30149    1190                                                       29467   -1.86    0.00  1.0000
  -6   8   0   29805    1320                                                       29127   -1.86    0.00  1.0000
   6  -8   0   28379    1230                                                       27717   -1.86    0.00  1.0000
  -6   8   0   28662    1240                                                       27997   -1.86    0.00  1.0000
   8   6   0   29727    1130                                                       29047   -1.87    0.00  1.0000
  -6   8   0   28014    1280                                                       27357   -1.86    0.00  1.0000
  -6   8   0   29046    1280                                                       28377   -1.86    0.00  1.0000
   6  -8   0   30159    1250                                                       29477   -1.86    0.00  1.0000
  -8  -6   0   29565    1170                                                       28887   -1.87    0.00  1.0000
  -6   8   0   30847    1230                                                       30157   -1.86    0.00  1.0000
  -8  -6   0   28674    1120                                                       28007   -1.87    0.00  1.0000
   6  -8   0   29451    1290                                                       28777   -1.86    0.00  1.0000
   8   6   0   29302    1120                                                       28627   -1.87    0.00  1.0000
   8   6   0   29211    1120                                                       28537   -1.87    0.00  1.0000
  -8  -6   0   29949    1160                                                       29267   -1.87    0.00  1.0000
  -8  -4   0   38251    1300                                                       33767   11.13    0.00  1.0000
   4  -8   0   37539    1400                                                       33097   11.13    0.00  1.0000
   4  -8   0   38220    1430                                                       33737   11.13    0.00  1.0000
   4  -8   0   39570    1380                                                       35006   11.13    0.00  1.0000
  -4   8   0   37049    1460                                                       32637   11.13    0.00  1.0000
  -4   8   0   37464    1410                                                       33027   11.13    0.00  1.0000
   8   4   0   38730    1310                                                       34217   11.13    0.00  1.0000
   4  -8   0   36601    1370                                                       32217   11.13    0.00  1.0000
  -4   8   0   36729    1400                                                       32337   11.13    0.00  1.0000
  -4   8   0   37304    1440                                                       32877   11.13    0.00  1.0000
  -4   8   0   37038    1430                                                       32627   11.13    0.00  1.0000
  -8  -4   0   39591    1300                                                       35026   11.13    0.00  1.0000
  -8  -4   0   38273    1320                                                       33787   11.13    0.00  1.0000
   8   4   0   36760    1290                                                       32367   11.13    0.00  1.0000
  -4   8   0   36750    1340                                                       32357   11.13    0.00  1.0000
  -4   8   0   39433    1410                                                       34877   11.13    0.00  1.0000
   4  -8   0   38529    1410                                                       34027   11.13    0.00  1.0000
   8   4   0   36622    1290                                                       32237   11.13    0.00  1.0000
   4  -8   0   37762    1440                                                       33307   11.13    0.00  1.0000
  -4   8   0   37208    1340                                                       32787   11.13    0.00  1.0000
  -8  -4   0   39124    1290                                                       34587   11.13    0.00  1.0000
  -8  -4   0   37165    1280                                                       32747   11.13    0.00  1.0000
   4  -8   0   39167    1400                                                       34627   11.13    0.00  1.0000
   8   4   0   37112    1310                                                       32697   11.13    0.00  1.0000
   4  -8   0   38252    1340                                                       33767   11.13    0.00  1.0000
   4  -8   0   36750    1420                                                       32357   11.13    0.00  1.0000
  -4   8   0   37539    1360                                                       33097   11.13    0.00  1.0000
  -8  -2   0      70      50                                                         150  -18.43    0.00  1.0000
  -8  -2   0      27      60                                                         310  -18.43    0.00  1.0000
   2  -8   0     150     140                                                          60  -18.42    0.00  1.0000
   2  -8   0      27     120                                                         310  -18.42    0.00  1.0000
  -2   8   0      33     130                                                         260  -18.42    0.00  1.0000
   2  -8   0      51     150                                                         190  -18.42    0.00  1.0000
  -8  -2   0      89      60                                                         120  -18.43    0.00  1.0000
  -2   8   0      28     140                                                         430  -18.42    0.00  1.0000
  -2   8   0      33     100                                                         470  -18.42    0.00  1.0000
  -2   8   0     114     140                                                          90  -18.42    0.00  1.0000
   2  -8   0      64      90                                                         160  -18.42    0.00  1.0000
   8   2   0      33      70                                                         260  -18.43    0.00  1.0000
   2  -8   0      60     150                                                         170  -18.42    0.00  1.0000
   2  -8   0      70     110                                                         150  -18.42    0.00  1.0000
  -2   8   0      29      90                                                         290  -18.42    0.00  1.0000
   8   2   0      96      70                                                         110  -18.43    0.00  1.0000
  -8  -2   0      89      70                                                         120  -18.43    0.00  1.0000
  -2   8   0     383     100                                                         -80  -18.42    0.00  1.0000
   8   2   0      48      60                                                         200  -18.43    0.00  1.0000
  -8  -2   0      82      90                                                         130  -18.43    0.00  1.0000
  -8  -2   0      39     110                                                         230  -18.43    0.00  1.0000
   2  -8   0     186     180                                                        1000  -18.42    0.00  1.0000
  -8  -2   0      37      40                                                         240  -18.43    0.00  1.0000
   8   2   0      33      50                                                         260  -18.43    0.00  1.0000
   8   2   0      55      40                                                         180  -18.43    0.00  1.0000
   8   2   0      25      50                                                         350  -18.43    0.00  1.0000
   2  -8   0      82      90                                                         130  -18.42    0.00  1.0000
   2  -8   0      60     100                                                         170  -18.42    0.00  1.0000
   8   2   0      45      90                                                         210  -18.43    0.00  1.0000
   8   2   0      55      50                                                         180  -18.43    0.00  1.0000
  -2   8   0      27     180                                                         310  -18.42    0.00  1.0000
  -2   8   0      28     100                                                         300  -18.42    0.00  1.0000
  -2   8   0     184     130                                                          40  -18.42    0.00  1.0000
   8   2   0      52      80                                                         190  -18.43    0.00  1.0000
  -2   8   0      42      90                                                         220  -18.42    0.00  1.0000
   2  -8   0      37     130                                                         240  -18.42    0.00  1.0000
   8   2   0      35      80                                                         250  -18.43    0.00  1.0000
   2  -8   0      37      90                                                         240  -18.42    0.00  1.0000
   0  -8   0  170171    5689                                                      151815   21.54    0.00  1.0000
   8   0   0  166860    5639                                                      148685   21.54    0.00  1.0000
   0   8   0  160826    5699                                                      142996   21.54    0.00  1.0000
   8   0   0  169106    5559                                                      150805   21.54    0.00  1.0000
   0   8   0  167883    5619                                                      149655   21.54    0.00  1.0000
   0   8   0  164186    5669                                                      146165   21.54    0.00  1.0000
   0  -8   0  168053    5619                                                      149815   21.54    0.00  1.0000
   8   0   0  167242    5629                                                      149045   21.54    0.00  1.0000
   0  -8   0  164419    5629                                                      146385   21.54    0.00  1.0000
   8   0   0  161424    5619                                                      143556   21.54    0.00  1.0000
   0   8   0  164864    5619                                                      146805   21.54    0.00  1.0000
   8   0   0  162580    5589                                                      144646   21.54    0.00  1.0000
   0  -8   0  168836    5629                                                      150555   21.54    0.00  1.0000
  -8   0   0  166945    5559                                                      148765   21.54    0.00  1.0000
  -8   0   0  168470    5619                                                      150205   21.54    0.00  1.0000
  -8   0   0  167348    5629                                                      149145   21.54    0.00  1.0000
  -8   0   0  172483    5649                                                      153995   21.54    0.00  1.0000
   0  -8   0  161059    5639                                                      143216   21.54    0.00  1.0000
  -8   0   0  168767    5659                                                      150485   21.54    0.00  1.0000
   8   0   0  168311    5629                                                      150055   21.54    0.00  1.0000
   0  -8   0  171727    5649                                                      153285   21.54    0.00  1.0000
  -8   0   0  173054    5589                                                      154535   21.54    0.00  1.0000
   8   0   0  166384    5619                                                      148235   21.54    0.00  1.0000
  -8   0   0  164953    5619                                                      146885   21.54    0.00  1.0000
  -8   0   0  166066    5599                                                      147935   21.54    0.00  1.0000
   0  -8   0  164419    5639                                                      146385   21.54    0.00  1.0000
   0   8   0  162829    5659                                                      144885   21.54    0.00  1.0000
  -8   0   0  160629    5629                                                      142806   21.54    0.00  1.0000
   0  -8   0  168858    5639                                                      150575   21.54    0.00  1.0000
   0  -8   0  165955    5689                                                      147835   21.54    0.00  1.0000
   0   8   0  168625    5609                                                      150355   21.54    0.00  1.0000
   0   8   0  168868    5609                                                      150585   21.54    0.00  1.0000
   0   8   0  161802    5669                                                      143916   21.54    0.00  1.0000
   0  -8   0  166411    5629                                                      148265   21.54    0.00  1.0000
   0   8   0  167364    5699                                                      149165   21.54    0.00  1.0000
   8   0   0  167379    5619                                                      149175   21.54    0.00  1.0000
   0  -8   0  164673    5659                                                      146625   21.54    0.00  1.0000
   0  -8   0  172954    5619                                                      154445   21.54    0.00  1.0000
   8   0   0  161700    5629                                                      143816   21.54    0.00  1.0000
  -2  -8   0      70     100                                                         150  -18.43    0.00  1.0000
   8  -2   0      33     120                                                         260  -18.42    0.00  1.0000
  -2  -8   0      28     120                                                         300  -18.43    0.00  1.0000
  -2  -8   0      65      90                                                         160  -18.43    0.00  1.0000
   8  -2   0      26     120                                                         400  -18.42    0.00  1.0000
  -8   2   0      45      80                                                         210  -18.42    0.00  1.0000
   2   8   0      37     110                                                         240  -18.43    0.00  1.0000
   8  -2   0     383     120                                                         -60  -18.42    0.00  1.0000
  -2  -8   0      31      80                                                         270  -18.43    0.00  1.0000
   2   8   0      65     110                                                         160  -18.43    0.00  1.0000
  -2  -8   0      76      70                                                         140  -18.43    0.00  1.0000
  -2  -8   0      37     100                                                         240  -18.43    0.00  1.0000
  -2  -8   0      35     120                                                         250  -18.43    0.00  1.0000
   2   8   0      52      50                                                         190  -18.43    0.00  1.0000
   2   8   0      52     100                                                         190  -18.43    0.00  1.0000
  -8   2   0      25     150                                                         370  -18.42    0.00  1.0000
  -2  -8   0      56      80                                                         180  -18.43    0.00  1.0000
  -8   2   0      64     130                                                         160  -18.42    0.00  1.0000
   8  -2   0     184     100                                                          40  -18.42    0.00  1.0000
   8  -2   0      33      60                                                         260  -18.42    0.00  1.0000
   8  -2   0      25     100                                                         360  -18.42    0.00  1.0000
   2   8   0      82     110                                                         130  -18.43    0.00  1.0000
  -2  -8   0      25     140                                                         350  -18.43    0.00  1.0000
  -8   2   0      37     100                                                         240  -18.42    0.00  1.0000
  -8   2   0     114     140                                                          90  -18.42    0.00  1.0000
   8  -2   0      35     100                                                         250  -18.42    0.00  1.0000
   2   8   0      30     150                                                         280  -18.43    0.00  1.0000
  -2  -8   0      96      60                                                         110  -18.43    0.00  1.0000
   2   8   0      37     100                                                         240  -18.43    0.00  1.0000
  -8   2   0      55     110                                                         180  -18.42    0.00  1.0000
  -8   2   0      70     120                                                         150  -18.42    0.00  1.0000
  -8   2   0      60      80                                                         170  -18.42    0.00  1.0000
   2   8   0      25     140                                                         370  -18.43    0.00  1.0000
   8  -2   0      82     120                                                         130  -18.42    0.00  1.0000
  -2  -8   0      35      70                                                         250  -18.43    0.00  1.0000
   2   8   0      45      70                                                         210  -18.43    0.00  1.0000
   8  -2   0      48     130                                                         200  -18.42    0.00  1.0000
  -8   2   0      55      70                                                         180  -18.42    0.00  1.0000
  -2  -8   0      25      90                                                         370  -18.43    0.00  1.0000
   2   8   0      25      80                                                         370  -18.43    0.00  1.0000
  -8   2   0      25     110                                                         380  -18.42    0.00  1.0000
   8  -2   0      35      70                                                         250  -18.42    0.00  1.0000
   4   8   0   37065    1340                                                       32647   11.14    0.00  1.0000
  -8   4   0   36229    1370                                                       31867   11.14    0.00  1.0000
  -4  -8   0   37001    1360                                                       32587   11.14    0.00  1.0000
   4   8   0   37246    1370                                                       32817   11.14    0.00  1.0000
   4   8   0   36830    1320                                                       32427   11.14    0.00  1.0000
  -8   4   0   38466    1330                                                       33967   11.14    0.00  1.0000
  -8   4   0   38722    1390                                                       34207   11.14    0.00  1.0000
   4   8   0   37831    1290                                                       33367   11.14    0.00  1.0000
   8  -4   0   37636    1400                                                       33187   11.14    0.00  1.0000
  -8   4   0   39371    1400                                                       34817   11.14    0.00  1.0000
   8  -4   0   38275    1390                                                       33787   11.14    0.00  1.0000
  -4  -8   0   37288    1290                                                       32857   11.14    0.00  1.0000
  -8   4   0   37700    1400                                                       33247   11.14    0.00  1.0000
   4   8   0   37650    1320                                                       33197   11.14    0.00  1.0000
   8  -4   0   37359    1390                                                       32927   11.14    0.00  1.0000
  -8   4   0   37210    1340                                                       32787   11.14    0.00  1.0000
   8  -4   0   37018    1370                                                       32607   11.14    0.00  1.0000
  -4  -8   0   37459    1300                                                       33017   11.14    0.00  1.0000
  -8   4   0   39975    1450                                                       35386   11.14    0.00  1.0000
  -4  -8   0   36777    1300                                                       32377   11.14    0.00  1.0000
   4   8   0   37310    1290                                                       32877   11.14    0.00  1.0000
   8  -4   0   37370    1330                                                       32937   11.14    0.00  1.0000
  -8   4   0   38009    1360                                                       33537   11.14    0.00  1.0000
  -4  -8   0   38034    1290                                                       33557   11.14    0.00  1.0000
   4   8   0   37405    1330                                                       32967   11.14    0.00  1.0000
  -4  -8   0   37416    1310                                                       32977   11.14    0.00  1.0000
  -8   4   0   40794    1410                                                       36156   11.14    0.00  1.0000
  -4  -8   0   38502    1310                                                       33997   11.14    0.00  1.0000
   4   8   0   37821    1340                                                       33357   11.14    0.00  1.0000
  -4  -8   0   38300    1310                                                       33807   11.14    0.00  1.0000
  -8   4   0   36528    1330                                                       32147   11.14    0.00  1.0000
   8  -4   0   37561    1400                                                       33117   11.14    0.00  1.0000
   8  -4   0   38520    1310                                                       34017   11.14    0.00  1.0000
   4   8   0   38736    1300                                                       34217   11.14    0.00  1.0000
   8  -4   0   38828    1370                                                       34307   11.14    0.00  1.0000
   8  -4   0   35333    1400                                                       31027   11.14    0.00  1.0000
   8  -4   0   37359    1370                                                       32927   11.14    0.00  1.0000
  -6  -8   0   28687    1130                                                       28017   -1.87    0.00  1.0000
   6   8   0   29122    1160                                                       28447   -1.87    0.00  1.0000
   8  -6   0   31711    1200                                                       31007   -1.87    0.00  1.0000
  -8   6   0   27836    1180                                                       27177   -1.87    0.00  1.0000
   8  -6   0   29991    1240                                                       29307   -1.87    0.00  1.0000
  -8   6   0   30123    1190                                                       29437   -1.87    0.00  1.0000
   8  -6   0   31144    1300                                                       30447   -1.87    0.00  1.0000
  -8   6   0   28787    1310                                                       28117   -1.87    0.00  1.0000
  -6  -8   0   29253    1130                                                       28577   -1.87    0.00  1.0000
   6   8   0   29435    1110                                                       28757   -1.87    0.00  1.0000
  -8   6   0   30285    1250                                                       29597   -1.87    0.00  1.0000
   6   8   0   29982    1170                                                       29297   -1.87    0.00  1.0000
   6   8   0   28970    1130                                                       28297   -1.87    0.00  1.0000
   6   8   0   29496    1110                                                       28817   -1.87    0.00  1.0000
   6   8   0   29537    1110                                                       28857   -1.87    0.00  1.0000
  -6  -8   0   29385    1130                                                       28707   -1.87    0.00  1.0000
  -6  -8   0   29729    1120                                                       29047   -1.87    0.00  1.0000
  -8   6   0   28969    1250                                                       28297   -1.87    0.00  1.0000
   8  -6   0   29172    1260                                                       28497   -1.87    0.00  1.0000
   8  -6   0   30720    1280                                                       30027   -1.87    0.00  1.0000
   6   8   0   29638    1140                                                       28957   -1.87    0.00  1.0000
  -8   6   0   28453    1270                                                       27787   -1.87    0.00  1.0000
   6   8   0   30235    1160                                                       29547   -1.87    0.00  1.0000
  -8   6   0   28737    1240                                                       28067   -1.87    0.00  1.0000
  -6  -8   0   28788    1110                                                       28117   -1.87    0.00  1.0000
  -6  -8   0   29435    1110                                                       28757   -1.87    0.00  1.0000
   8  -6   0   29748    1230                                                       29067   -1.87    0.00  1.0000
   8  -6   0   30123    1270                                                       29437   -1.87    0.00  1.0000
   6   8   0   28262    1140                                                       27597   -1.87    0.00  1.0000
  -8   6   0   29860    1280                                                       29177   -1.87    0.00  1.0000
   8  -6   0   30477    1170                                                       29787   -1.87    0.00  1.0000
   8  -6   0   29910    1260                                                       29227   -1.87    0.00  1.0000
   6   8   0   29091    1150                                                       28417   -1.87    0.00  1.0000
  -8   6   0   28919    1210                                                       28247   -1.87    0.00  1.0000
  -6  -8   0   29951    1190                                                       29267   -1.87    0.00  1.0000
  -8   6   0   30659    1230                                                       29967   -1.87    0.00  1.0000
  -8   8   0   22438    1020                                                       23518   -3.35    0.00  1.0000
   8  -8   0   16938     870                                                       17878   -3.35    0.00  1.0000
   8   8   0   17709     770                                                       18668   -3.35    0.00  1.0000
   8  -8   0   16374     830                                                       17298   -3.35    0.00  1.0000
   8  -8   0   17649     910                                                       18608   -3.35    0.00  1.0000
   8  -8   0   19062     940                                                       20058   -3.35    0.00  1.0000
  -8   8   0   15975     810                                                       16888   -3.35    0.00  1.0000
  -8   8   0   15916     820                                                       16828   -3.35    0.00  1.0000
   8  -8   0   19920     950                                                       20938   -3.35    0.00  1.0000
   8  -8   0   15333     800                                                       16228   -3.35    0.00  1.0000
   8  -8   0   16121     860                                                       17038   -3.35    0.00  1.0000
   8  -8   0   16870     940                                                       17808   -3.35    0.00  1.0000
   8   8   0   17972     780                                                       18938   -3.35    0.00  1.0000
  -8   8   0   17805     930                                                       18768   -3.35    0.00  1.0000
  -8   8   0   20242     940                                                       21268   -3.35    0.00  1.0000
  -8  -8   0   18216     760                                                       19188   -3.35    0.00  1.0000
  -8  -8   0   21278     810                                                       22328   -3.35    0.00  1.0000
  -8   8   0   17639     890                                                       18598   -3.35    0.00  1.0000
   8   8   0   17437     760                                                       18388   -3.35    0.00  1.0000
   8  -8   0   21452     960                                                       22508   -3.35    0.00  1.0000
  -8   8   0   18701     890                                                       19688   -3.35    0.00  1.0000
   8  -8   0   19383     900                                                       20388   -3.35    0.00  1.0000
   8   8   0   17777     760                                                       18738   -3.35    0.00  1.0000
  -8  -8   0   17573     740                                                       18528   -3.35    0.00  1.0000
   8  -8   0   14964     820                                                       15848   -3.35    0.00  1.0000
  -7   9   0    1553     250                                                        1380   -2.14    0.00  1.0000
   7  -9   0    2333     300                                                        2120   -2.14    0.00  1.0000
   9   7   0    2240     170                                                        2030    2.15    0.00  1.0000
   9   7   0    2324     160                                                        2110    2.15    0.00  1.0000
  -7   9   0    2238     300                                                        2030   -2.14    0.00  1.0000
   7  -9   0    2217     220                                                        2010   -2.14    0.00  1.0000
  -7   9   0    1457     300                                                        1290   -2.14    0.00  1.0000
   7  -9   0    2217     220                                                        2010   -2.14    0.00  1.0000
  -7   9   0    2542     230                                                        2320   -2.14    0.00  1.0000
   7  -9   0    1595     240                                                        1420   -2.14    0.00  1.0000
  -9  -7   0    2187     130                                                        1980    2.15    0.00  1.0000
   7  -9   0    2783     330                                                        2550   -2.14    0.00  1.0000
  -7   9   0    2123     220                                                        1920   -2.14    0.00  1.0000
  -9  -7   0    2208     190                                                        2000    2.15    0.00  1.0000
   7  -9   0    1997     230                                                        1800   -2.14    0.00  1.0000
  -7   9   0    2752     300                                                        2520   -2.14    0.00  1.0000
  -9  -7   0    1744     130                                                        1560    2.15    0.00  1.0000
   7  -9   0    2406     260                                                        2190   -2.14    0.00  1.0000
   7  -9   0    1902     230                                                        1710   -2.14    0.00  1.0000
  -7   9   0    1638     210                                                        1460   -2.14    0.00  1.0000
   9   7   0    2145     140                                                        1940    2.15    0.00  1.0000
  -9  -7   0    2113     160                                                        1910    2.15    0.00  1.0000
   9   7   0    2071     140                                                        1870    2.15    0.00  1.0000
   7  -9   0    2154     280                                                        1950   -2.14    0.00  1.0000
  -9  -7   0    2366     200                                                        2150    2.15    0.00  1.0000
   7  -9   0    1265     250                                                        1110   -2.14    0.00  1.0000
  -7   9   0    1764     190                                                        1580   -2.14    0.00  1.0000
  -5   9   0   80186    3380                                                       86421   10.17    0.00  1.0000
  -5   9   0   77789    3420                                                       83932   10.17    0.00  1.0000
  -5   9   0   82643    3390                                                       88971   10.17    0.00  1.0000
   9   5   0   80088    3270                                                       86321  -10.17    0.00  1.0000
   5  -9   0   79203    3370                                                       85401   10.17    0.00  1.0000
   9   5   0   81514    3270                                                       87801  -10.17    0.00  1.0000
   5  -9   0   77905    3350                                                       84052   10.17    0.00  1.0000
  -9  -5   0   78009    3250                                                       84162  -10.17    0.00  1.0000
   5  -9   0   79935    3360                                                       86161   10.17    0.00  1.0000
  -9  -5   0   77701    3260                                                       83842  -10.17    0.00  1.0000
  -5   9   0   81592    3450                                                       87881   10.17    0.00  1.0000
   5  -9   0   77462    3380                                                       83592   10.17    0.00  1.0000
   9   5   0   75930    3250                                                       82002  -10.17    0.00  1.0000
  -9  -5   0   79433    3260                                                       85641  -10.17    0.00  1.0000
  -9  -5   0   80098    3290                                                       86331  -10.17    0.00  1.0000
   5  -9   0   82614    3310                                                       88941   10.17    0.00  1.0000
  -5   9   0   81506    3310                                                       87791   10.17    0.00  1.0000
   5  -9   0   80802    3420                                                       87061   10.17    0.00  1.0000
  -5   9   0   79666    3410                                                       85881   10.17    0.00  1.0000
   9   5   0   77566    3250                                                       83702  -10.17    0.00  1.0000
   5  -9   0   80012    3400                                                       86241   10.17    0.00  1.0000
  -5   9   0   80311    3330                                                       86551   10.17    0.00  1.0000
  -5   9   0   78895    3310                                                       85081   10.17    0.00  1.0000
   5  -9   0   76490    3380                                                       82582   10.17    0.00  1.0000
   5  -9   0   77067    3420                                                       83182   10.17    0.00  1.0000
  -9  -5   0   81822    3240                                                       88121  -10.17    0.00  1.0000
  -9  -3   0   45232    1600                                                       40086   11.74    0.00  1.0000
  -9  -3   0   44679    1570                                                       39566   11.74    0.00  1.0000
  -9  -3   0   45243    1530                                                       40096   11.74    0.00  1.0000
   9   3   0   44988    1520                                                       39856   11.74    0.00  1.0000
   3  -9   0   44086    1650                                                       39006  -11.74    0.00  1.0000
   9   3   0   45933    1540                                                       40746   11.74    0.00  1.0000
   3  -9   0   44171    1650                                                       39086  -11.74    0.00  1.0000
  -3   9   0   45893    1710                                                       40706  -11.74    0.00  1.0000
   3  -9   0   45011    1710                                                       39876  -11.74    0.00  1.0000
   3  -9   0   43140    1660                                                       38116  -11.74    0.00  1.0000
  -9  -3   0   45423    1550                                                       40266   11.74    0.00  1.0000
   9   3   0   45444    1580                                                       40286   11.74    0.00  1.0000
   3  -9   0   45956    1680                                                       40766  -11.74    0.00  1.0000
  -3   9   0   45319    1690                                                       40166  -11.74    0.00  1.0000
  -3   9   0   45648    1620                                                       40476  -11.74    0.00  1.0000
   3  -9   0   45882    1640                                                       40696  -11.74    0.00  1.0000
   3  -9   0   46232    1690                                                       41026  -11.74    0.00  1.0000
  -9  -3   0   47100    1550                                                       41846   11.74    0.00  1.0000
   3  -9   0   45786    1640                                                       40606  -11.74    0.00  1.0000
  -3   9   0   44161    1660                                                       39076  -11.74    0.00  1.0000
   9   3   0   44265    1540                                                       39176   11.74    0.00  1.0000
  -3   9   0   46254    1600                                                       41046  -11.74    0.00  1.0000
   3  -9   0   46402    1660                                                       41186  -11.74    0.00  1.0000
   9   3   0   44860    1530                                                       39736   11.74    0.00  1.0000
  -3   9   0   45298    1610                                                       40146  -11.74    0.00  1.0000
  -9  -3   0   45657    1520                                                       40486   11.74    0.00  1.0000
  -3   9   0   45786    1660                                                       40606  -11.74    0.00  1.0000
   3  -9   0   47824    1670                                                       42526  -11.74    0.00  1.0000
  -3   9   0   47262    1730                                                       41996  -11.74    0.00  1.0000
  -9  -3   0   46124    1560                                                       40926   11.74    0.00  1.0000
  -9  -3   0   43595    1530                                                       38546   11.74    0.00  1.0000
   9   3   0   44382    1560                                                       39286   11.74    0.00  1.0000
   9   3   0   45699    1530                                                       40526   11.74    0.00  1.0000
   9   3   0   45667    1560                                                       40496   11.74    0.00  1.0000
  -3   9   0   47283    1620                                                       42016  -11.74    0.00  1.0000
  -9  -1   0    1148     120                                                         370  -14.10    0.00  1.0000
  -9  -1   0     968     130                                                         270  -14.10    0.00  1.0000
   1  -9   0    1434     110                                                         540   14.10    0.00  1.0000
   1  -9   0     986     120                                                         280   14.10    0.00  1.0000
  -9  -1   0    1166      80                                                         380  -14.10    0.00  1.0000
   1  -9   0    1336     110                                                         480   14.10    0.00  1.0000
   9   1   0    1166      60                                                         380  -14.10    0.00  1.0000
   1  -9   0     224     140                                                         -40   14.10    0.00  1.0000
   9   1   0    1218     100                                                         410  -14.10    0.00  1.0000
  -9  -1   0    1269     100                                                         440  -14.10    0.00  1.0000
   9   1   0    1319     100                                                         470  -14.10    0.00  1.0000
   9   1   0    1131     100                                                         360  -14.10    0.00  1.0000
   9   1   0     949     110                                                         260  -14.10    0.00  1.0000
   1  -9   0    1166     110                                                         380   14.10    0.00  1.0000
  -9  -1   0    1252      70                                                         430  -14.10    0.00  1.0000
  -9  -1   0    1131     100                                                         360  -14.10    0.00  1.0000
   1  -9   0    1042     140                                                         310   14.10    0.00  1.0000
  -1   9   0    1418     100                                                         530   14.10    0.00  1.0000
   9   1   0    1023      80                                                         300  -14.10    0.00  1.0000
   1  -9   0     508     100                                                          60   14.10    0.00  1.0000
   1  -9   0    1042     160                                                         310   14.10    0.00  1.0000
  -1   9   0     535     130                                                          70   14.10    0.00  1.0000
   9   1   0    1042     110                                                         310  -14.10    0.00  1.0000
  -1   9   0     770     150                                                         170   14.10    0.00  1.0000
  -9  -1   0     852      80                                                         210  -14.10    0.00  1.0000
  -1   9   0    1201     100                                                         400   14.10    0.00  1.0000
   1  -9   0    1042     110                                                         310   14.10    0.00  1.0000
   1  -9   0     791     150                                                         180   14.10    0.00  1.0000
   9   1   0    1466      70                                                         560  -14.10    0.00  1.0000
  -1   9   0     832     160                                                         200   14.10    0.00  1.0000
  -9  -1   0    1166     130                                                         380  -14.10    0.00  1.0000
   1  -9   0    1078     110                                                         330   14.10    0.00  1.0000
   9   1   0    1201     100                                                         400  -14.10    0.00  1.0000
  -1   9   0    1218     100                                                         410   14.10    0.00  1.0000
  -1   9   0    1235     140                                                         420   14.10    0.00  1.0000
  -1   9   0     930      90                                                         250   14.10    0.00  1.0000
   1  -9   0    1166     140                                                         380   14.10    0.00  1.0000
  -9   1   0    1217     160                                                         410   14.09    0.00  1.0000
   9  -1   0    1235      80                                                         420   14.09    0.00  1.0000
  -1  -9   0    1131      90                                                         360  -14.10    0.00  1.0000
  -1  -9   0     891      80                                                         230  -14.10    0.00  1.0000
  -9   1   0    1113     110                                                         350   14.09    0.00  1.0000
  -1  -9   0    1096     150                                                         340  -14.10    0.00  1.0000
  -1  -9   0    1149     100                                                         370  -14.10    0.00  1.0000
  -9   1   0    1113      90                                                         350   14.09    0.00  1.0000
  -1  -9   0     949     100                                                         260  -14.10    0.00  1.0000
  -1  -9   0    1286     130                                                         450  -14.10    0.00  1.0000
   1   9   0    1514     140                                                         590  -14.10    0.00  1.0000
  -1  -9   0    1060     130                                                         320  -14.10    0.00  1.0000
   9  -1   0     224     110                                                           0   14.09    0.00  1.0000
  -1  -9   0     791      90                                                         180  -14.10    0.00  1.0000
   9  -1   0    1095     120                                                         340   14.09    0.00  1.0000
   1   9   0    1149      90                                                         370  -14.10    0.00  1.0000
  -1  -9   0    1005     110                                                         290  -14.10    0.00  1.0000
  -9   1   0    1335      70                                                         480   14.09    0.00  1.0000
   9  -1   0     986     100                                                         280   14.09    0.00  1.0000
   9  -1   0    1005     110                                                         290   14.09    0.00  1.0000
  -9   1   0    1268      90                                                         440   14.09    0.00  1.0000
   1   9   0    1114      80                                                         350  -14.10    0.00  1.0000
   9  -1   0     986      80                                                         280   14.09    0.00  1.0000
  -9   1   0    1482     170                                                         570   14.09    0.00  1.0000
   9  -1   0    1077     130                                                         330   14.09    0.00  1.0000
   9  -1   0    1450     110                                                         550   14.09    0.00  1.0000
   1   9   0    1184     160                                                         390  -14.10    0.00  1.0000
  -9   1   0     968     120                                                         270   14.09    0.00  1.0000
  -1  -9   0    1218     110                                                         410  -14.10    0.00  1.0000
  -1  -9   0     683     130                                                         130  -14.10    0.00  1.0000
   1   9   0    1078      90                                                         330  -14.10    0.00  1.0000
   1   9   0    1024     160                                                         300  -14.10    0.00  1.0000
   1   9   0    1302     140                                                         460  -14.10    0.00  1.0000
   1   9   0    1166     130                                                         380  -14.10    0.00  1.0000
  -1  -9   0     872      90                                                         220  -14.10    0.00  1.0000
  -9   1   0    1335     120                                                         480   14.09    0.00  1.0000
  -9   1   0    1166     130                                                         380   14.09    0.00  1.0000
  -1  -9   0    1319     170                                                         470  -14.10    0.00  1.0000
   9  -1   0    1401     120                                                         520   14.09    0.00  1.0000
   1   9   0    1005     120                                                         290  -14.10    0.00  1.0000
   9  -3   0   44647    1670                                                       39536  -11.73    0.00  1.0000
   3   9   0   40641    1630                                                       35766   11.75    0.00  1.0000
  -3  -9   0   45132    1640                                                       39986   11.75    0.00  1.0000
  -9   3   0   44785    1630                                                       39666  -11.73    0.00  1.0000
  -3  -9   0   45981    1590                                                       40786   11.75    0.00  1.0000
  -9   3   0   46272    1590                                                       41066  -11.73    0.00  1.0000
  -3  -9   0   47043    1570                                                       41786   11.75    0.00  1.0000
  -3  -9   0   40886    1590                                                       35996   11.75    0.00  1.0000
   9  -3   0   44583    1630                                                       39476  -11.73    0.00  1.0000
  -9   3   0   44902    1590                                                       39776  -11.73    0.00  1.0000
  -9   3   0   47079    1700                                                       41826  -11.73    0.00  1.0000
   3   9   0   45833    1670                                                       40646   11.75    0.00  1.0000
   9  -3   0   42382    1590                                                       37406  -11.73    0.00  1.0000
  -9   3   0   46038    1670                                                       40846  -11.73    0.00  1.0000
  -3  -9   0   45163    1540                                                       40016   11.75    0.00  1.0000
   9  -3   0   45624    1630                                                       40456  -11.73    0.00  1.0000
  -9   3   0   46230    1620                                                       41026  -11.73    0.00  1.0000
   9  -3   0   45465    1650                                                       40306  -11.73    0.00  1.0000
   3   9   0   44196    1620                                                       39106   11.75    0.00  1.0000
   3   9   0   46852    1570                                                       41606   11.75    0.00  1.0000
  -3  -9   0   46056    1650                                                       40856   11.75    0.00  1.0000
   3   9   0   46045    1600                                                       40846   11.75    0.00  1.0000
   3   9   0   44483    1570                                                       39376   11.75    0.00  1.0000
   9  -3   0   47874    1570                                                       42576  -11.73    0.00  1.0000
  -3  -9   0   45333    1600                                                       40176   11.75    0.00  1.0000
   3   9   0   46799    1620                                                       41556   11.75    0.00  1.0000
  -3  -9   0   46066    1570                                                       40866   11.75    0.00  1.0000
  -9   3   0   46760    1640                                                       41526  -11.73    0.00  1.0000
   9  -3   0   45391    1660                                                       40236  -11.73    0.00  1.0000
   9  -3   0   47079    1650                                                       41826  -11.73    0.00  1.0000
   9  -3   0   44732    1630                                                       39616  -11.73    0.00  1.0000
  -9   3   0   46261    1600                                                       41056  -11.73    0.00  1.0000
   3   9   0   47488    1610                                                       42206   11.75    0.00  1.0000
  -3  -9   0   45620    1590                                                       40446   11.75    0.00  1.0000
  -3  -9   0   46130    1600                                                       40926   11.75    0.00  1.0000
   3   9   0   45939    1620                                                       40746   11.75    0.00  1.0000
  -9   3   0   46070    1660                                                       40876  -11.73    0.00  1.0000
  -3  -9   0   45132    1590                                                       39986   11.75    0.00  1.0000
  -9   3   0   46155    1660                                                       40956  -11.73    0.00  1.0000
   5   9   0   79169    3330                                                       85371  -10.18    0.00  1.0000
  -5  -9   0   81037    3290                                                       87311  -10.18    0.00  1.0000
  -9   5   0   80356    3350                                                       86601   10.17    0.00  1.0000
  -9   5   0   79855    3330                                                       86081   10.17    0.00  1.0000
   9  -5   0   82610    3400                                                       88941   10.17    0.00  1.0000
  -5  -9   0   81076    3300                                                       87351  -10.18    0.00  1.0000
   9  -5   0   79431    3410                                                       85641   10.17    0.00  1.0000
   5   9   0   80719    3370                                                       86981  -10.18    0.00  1.0000
  -9   5   0   84664    3420                                                       91071   10.17    0.00  1.0000
  -5  -9   0   80401    3300                                                       86651  -10.18    0.00  1.0000
   5   9   0   75772    3320                                                       81842  -10.18    0.00  1.0000
  -9   5   0   83343    3460                                                       89701   10.17    0.00  1.0000
   5   9   0   77735    3330                                                       83882  -10.18    0.00  1.0000
   9  -5   0   77632    3400                                                       83772   10.17    0.00  1.0000
  -9   5   0   81772    3420                                                       88071   10.17    0.00  1.0000
   5   9   0   78679    3280                                                       84862  -10.18    0.00  1.0000
  -9   5   0   82928    3390                                                       89271   10.17    0.00  1.0000
   9  -5   0   78286    3380                                                       84452   10.17    0.00  1.0000
   9  -5   0   80394    3340                                                       86641   10.17    0.00  1.0000
   5   9   0   79641    3280                                                       85861  -10.18    0.00  1.0000
   9  -5   0   79691    3380                                                       85911   10.17    0.00  1.0000
  -5  -9   0   78717    3280                                                       84902  -10.18    0.00  1.0000
  -5  -9   0   81519    3280                                                       87811  -10.18    0.00  1.0000
  -9   5   0   80076    3360                                                       86311   10.17    0.00  1.0000
  -9   5   0   78757    3340                                                       84941   10.17    0.00  1.0000
  -9   5   0   83073    3400                                                       89421   10.17    0.00  1.0000
   9  -5   0   79335    3410                                                       85541   10.17    0.00  1.0000
   5   9   0   81953    3290                                                       88261  -10.18    0.00  1.0000
  -5  -9   0   82550    3310                                                       88881  -10.18    0.00  1.0000
  -9   5   0   79219    3400                                                       85421   10.17    0.00  1.0000
   5   9   0   80604    3330                                                       86861  -10.18    0.00  1.0000
   5   9   0   79313    3310                                                       85521  -10.18    0.00  1.0000
  -5  -9   0   82868    3300                                                       89211  -10.18    0.00  1.0000
   9  -5   0   80943    3320                                                       87211   10.17    0.00  1.0000
   9  -5   0   79152    3380                                                       85351   10.17    0.00  1.0000
   9  -5   0   78286    3430                                                       84452   10.17    0.00  1.0000
  -5  -9   0   80209    3360                                                       86451  -10.18    0.00  1.0000
   9  -7   0    2176     270                                                        1970   -2.14    0.00  1.0000
  -7  -9   0    2218     140                                                        2010    2.14    0.00  1.0000
  -9   7   0    2040     230                                                        1840   -2.14    0.00  1.0000
   9  -7   0    2061     240                                                        1860   -2.14    0.00  1.0000
   7   9   0    2092     140                                                        1890    2.14    0.00  1.0000
  -9   7   0    2050     210                                                        1850   -2.14    0.00  1.0000
  -7  -9   0    2439     150                                                        2220    2.14    0.00  1.0000
  -9   7   0    2082     320                                                        1880   -2.14    0.00  1.0000
  -9   7   0    2082     270                                                        1880   -2.14    0.00  1.0000
  -9   7   0    2082     190                                                        1880   -2.14    0.00  1.0000
   7   9   0    2124     170                                                        1920    2.14    0.00  1.0000
   9  -7   0    1723     270                                                        1540   -2.14    0.00  1.0000
   7   9   0    2239     180                                                        2030    2.14    0.00  1.0000
   7   9   0    2229     120                                                        2020    2.14    0.00  1.0000
   9  -7   0    2197     180                                                        1990   -2.14    0.00  1.0000
  -9   7   0    2544     270                                                        2320   -2.14    0.00  1.0000
  -9   7   0    2512     260                                                        2290   -2.14    0.00  1.0000
   9  -7   0    2732     240                                                        2500   -2.14    0.00  1.0000
  -7  -9   0    1670     130                                                        1490    2.14    0.00  1.0000
   7   9   0    2071     180                                                        1870    2.14    0.00  1.0000
  -7  -9   0    2239     130                                                        2030    2.14    0.00  1.0000
  -7  -9   0    1966     150                                                        1770    2.14    0.00  1.0000
   7   9   0    2166     160                                                        1960    2.14    0.00  1.0000
  -7  -9   0    1786     210                                                        1600    2.14    0.00  1.0000
   9  -7   0    2627     280                                                        2400   -2.14    0.00  1.0000
   9  -7   0    1955     270                                                        1760   -2.14    0.00  1.0000
   9  -7   0    1670     270                                                        1490   -2.14    0.00  1.0000
   7   9   0    2060     150                                                        1860    2.14    0.00  1.0000
   7   9   0    2239     110                                                        2030    2.14    0.00  1.0000
  -7  -9   0    2250     130                                                        2040    2.14    0.00  1.0000
   9  -7   0    2700     230                                                        2470   -2.14    0.00  1.0000
  -7  -9   0    1987     200                                                        1790    2.14    0.00  1.0000
  -9   7   0    2344     290                                                        2130   -2.14    0.00  1.0000
   7   9   0    2407     170                                                        2190    2.14    0.00  1.0000
   7   9   0    2082     130                                                        1880    2.14    0.00  1.0000
   9  -7   0    2239     300                                                        2030   -2.14    0.00  1.0000
  -9  -9   0   10509     380                                                        9039    7.06    0.00  1.0000
  -9  -9   0   11413     380                                                        9879    7.06    0.00  1.0000
  -8  10   0     722     300                                                         880    2.65    0.00  1.0000
  10   8   0     569     100                                                         710    2.65    0.00  1.0000
  -8  10   0      89     180                                                         150    2.65    0.00  1.0000
   8 -10   0     391     200                                                         510    2.65    0.00  1.0000
   8 -10   0     497     180                                                         630    2.65    0.00  1.0000
 -10  -8   0     435     140                                                         560    2.65    0.00  1.0000
   8 -10   0     922     170                                                        1100    2.65    0.00  1.0000
  10   8   0     400      90                                                         520    2.65    0.00  1.0000
   8 -10   0     506     250                                                         640    2.65    0.00  1.0000
  -8  10   0     497     170                                                         630    2.65    0.00  1.0000
   8 -10   0     959     210                                                        1140    2.65    0.00  1.0000
   8 -10   0     524     150                                                         660    2.65    0.00  1.0000
  -8  10   0     374     160                                                         490    2.65    0.00  1.0000
 -10  -8   0     409     100                                                         530    2.65    0.00  1.0000
  -8  10   0     551     150                                                         690    2.65    0.00  1.0000
   8 -10   0     426     200                                                         550    2.65    0.00  1.0000
 -10  -8   0     515      80                                                         650    2.65    0.00  1.0000
 -10  -8   0     453     120                                                         580    2.65    0.00  1.0000
  10   8   0     622     120                                                         770    2.65    0.00  1.0000
  -8  10   0     740     170                                                         900    2.65    0.00  1.0000
  -8  10   0     849     240                                                        1020    2.65    0.00  1.0000
   8 -10   0     356     230                                                         470    2.65    0.00  1.0000
 -10  -8   0     409     130                                                         530    2.65    0.00  1.0000
  10   8   0     776     130                                                         940    2.65    0.00  1.0000
   8 -10   0     279     210                                                         380    2.65    0.00  1.0000
  -8  10   0     658     250                                                         810    2.65    0.00  1.0000
  10   6   0   26206    1200                                                       29127    8.27    0.00  1.0000
  -6  10   0   26558    1340                                                       29497    8.26    0.00  1.0000
  -6  10   0   28496    1280                                                       31537    8.26    0.00  1.0000
   6 -10   0   28154    1290                                                       31177    8.26    0.00  1.0000
  10   6   0   26984    1200                                                       29947    8.27    0.00  1.0000
   6 -10   0   29732    1280                                                       32837    8.26    0.00  1.0000
   6 -10   0   27166    1330                                                       30137    8.26    0.00  1.0000
   6 -10   0   28819    1290                                                       31877    8.26    0.00  1.0000
  -6  10   0   26777    1280                                                       29727    8.26    0.00  1.0000
   6 -10   0   28886    1370                                                       31947    8.26    0.00  1.0000
 -10  -6   0   27107    1200                                                       30077    8.27    0.00  1.0000
  -6  10   0   27232    1430                                                       30207    8.26    0.00  1.0000
  10   6   0   27459    1230                                                       30447    8.27    0.00  1.0000
   6 -10   0   28040    1400                                                       31057    8.26    0.00  1.0000
   6 -10   0   27166    1360                                                       30137    8.26    0.00  1.0000
   6 -10   0   28040    1380                                                       31057    8.26    0.00  1.0000
  -6  10   0   27992    1300                                                       31007    8.26    0.00  1.0000
  10   6   0   28285    1230                                                       31317    8.27    0.00  1.0000
   6 -10   0   28562    1350                                                       31607    8.26    0.00  1.0000
   6 -10   0   27090    1320                                                       30057    8.26    0.00  1.0000
 -10  -6   0   28085    1190                                                       31107    8.27    0.00  1.0000
  -6  10   0   26350    1390                                                       29277    8.26    0.00  1.0000
  -6  10   0   28296    1360                                                       31327    8.26    0.00  1.0000
 -10  -6   0   27012    1210                                                       29977    8.27    0.00  1.0000
   6 -10   0   28325    1410                                                       31357    8.26    0.00  1.0000
 -10  -6   0   28076    1220                                                       31097    8.27    0.00  1.0000
 -10  -6   0   28570    1250                                                       31617    8.27    0.00  1.0000
  -4  10   0   21858    1040                                                       24758   -8.94    0.00  1.0000
   4 -10   0   21557    1070                                                       24438   -8.94    0.00  1.0000
  10   4   0   22058     980                                                       24968   -8.93    0.00  1.0000
   4 -10   0   21154    1030                                                       24008   -8.94    0.00  1.0000
 -10  -4   0   21203     980                                                       24058   -8.93    0.00  1.0000
  -4  10   0   20609    1090                                                       23428   -8.94    0.00  1.0000
   4 -10   0   21238    1130                                                       24098   -8.94    0.00  1.0000
   4 -10   0   23541    1110                                                       26547   -8.94    0.00  1.0000
   4 -10   0   21013    1070                                                       23858   -8.94    0.00  1.0000
  -4  10   0   21501    1050                                                       24378   -8.94    0.00  1.0000
  -4  10   0   22430    1180                                                       25367   -8.94    0.00  1.0000
  -4  10   0   22515    1160                                                       25457   -8.94    0.00  1.0000
 -10  -4   0   21682    1020                                                       24568   -8.93    0.00  1.0000
  10   4   0   21466    1000                                                       24338   -8.93    0.00  1.0000
  -4  10   0   22412    1100                                                       25347   -8.94    0.00  1.0000
  10   4   0   20640     970                                                       23458   -8.93    0.00  1.0000
   4 -10   0   20075    1140                                                       22858   -8.94    0.00  1.0000
  -4  10   0   22186    1130                                                       25107   -8.94    0.00  1.0000
 -10  -4   0   22030     980                                                       24938   -8.93    0.00  1.0000
   4 -10   0   20600    1100                                                       23418   -8.94    0.00  1.0000
  10   4   0   21588    1020                                                       24468   -8.93    0.00  1.0000
 -10  -4   0   21842     960                                                       24738   -8.93    0.00  1.0000
   4 -10   0   21285    1090                                                       24148   -8.94    0.00  1.0000
   4 -10   0   21492    1120                                                       24368   -8.94    0.00  1.0000
  -4  10   0   21820    1030                                                       24718   -8.94    0.00  1.0000
  -4  10   0   21501    1050                                                       24378   -8.94    0.00  1.0000
  -2  10   0   45473    2080                                                       49075    7.82    0.00  1.0000
  10   2   0   45363    1970                                                       48955    7.80    0.00  1.0000
  -2  10   0   47119    2050                                                       50785    7.82    0.00  1.0000
   2 -10   0   47832    2030                                                       51525    7.82    0.00  1.0000
   2 -10   0   46590    2070                                                       50235    7.82    0.00  1.0000
  10   2   0   45661    1980                                                       49265    7.80    0.00  1.0000
  -2  10   0   48613    1990                                                       52335    7.82    0.00  1.0000
   2 -10   0   46128    2010                                                       49755    7.82    0.00  1.0000
  10   2   0   47028    1930                                                       50685    7.80    0.00  1.0000
   2 -10   0   47611    2080                                                       51295    7.82    0.00  1.0000
  10   2   0   44785    1920                                                       48355    7.80    0.00  1.0000
   2 -10   0   46599    2040                                                       50245    7.82    0.00  1.0000
   2 -10   0   46359    2040                                                       49995    7.82    0.00  1.0000
   2 -10   0   47331    2000                                                       51005    7.82    0.00  1.0000
 -10  -2   0   46162    1930                                                       49785    7.80    0.00  1.0000
   2 -10   0   48796    2050                                                       52525    7.82    0.00  1.0000
  -2  10   0   47457    1990                                                       51135    7.82    0.00  1.0000
   2 -10   0   48796    2030                                                       52525    7.82    0.00  1.0000
   2 -10   0   50011    2050                                                       53785    7.82    0.00  1.0000
  -2  10   0   46956    2000                                                       50615    7.82    0.00  1.0000
  10   2   0   46335    1960                                                       49965    7.80    0.00  1.0000
 -10  -2   0   46229    1950                                                       49855    7.80    0.00  1.0000
  10   2   0   46624    1960                                                       50265    7.80    0.00  1.0000
  10   2   0   46499    1960                                                       50135    7.80    0.00  1.0000
  -2  10   0   46965    1990                                                       50625    7.82    0.00  1.0000
 -10  -2   0   47057    1940                                                       50715    7.80    0.00  1.0000
 -10  -2   0   48377    2010                                                       52085    7.80    0.00  1.0000
  -2  10   0   46648    2110                                                       50295    7.82    0.00  1.0000
  10   2   0   47173    1950                                                       50835    7.80    0.00  1.0000
  -2  10   0   46648    2050                                                       50295    7.82    0.00  1.0000
 -10  -2   0   46412    1960                                                       50045    7.80    0.00  1.0000
  10   2   0   47838    1970                                                       51525    7.80    0.00  1.0000
   2 -10   0   48170    1990                                                       51875    7.82    0.00  1.0000
  -2  10   0   45973    2100                                                       49595    7.82    0.00  1.0000
   2 -10   0   47187    2100                                                       50855    7.82    0.00  1.0000
 -10  -2   0   47472    1980                                                       51145    7.80    0.00  1.0000
 -10  -2   0   45488    1960                                                       49085    7.80    0.00  1.0000
  10   0   0   15100     710                                                       17618   -9.27    0.00  1.0000
   0 -10   0   13813     770                                                       16228   -9.28    0.00  1.0000
   0 -10   0   15793     850                                                       18368   -9.28    0.00  1.0000
   0  10   0   14719     800                                                       17208   -9.28    0.00  1.0000
   0  10   0   14571     750                                                       17048   -9.28    0.00  1.0000
 -10   0   0   15248     750                                                       17778   -9.27    0.00  1.0000
   0 -10   0   15135     840                                                       17658   -9.28    0.00  1.0000
 -10   0   0   15377     810                                                       17918   -9.27    0.00  1.0000
   0 -10   0   15200     750                                                       17728   -9.28    0.00  1.0000
  10   0   0   14619     760                                                       17098   -9.27    0.00  1.0000
   0 -10   0   16071     760                                                       18668   -9.28    0.00  1.0000
   0  10   0   15117     850                                                       17638   -9.28    0.00  1.0000
   0  10   0   14183     820                                                       16628   -9.28    0.00  1.0000
   0 -10   0   15311     790                                                       17848   -9.28    0.00  1.0000
   0  10   0   14164     850                                                       16608   -9.28    0.00  1.0000
   0 -10   0   14876     770                                                       17378   -9.28    0.00  1.0000
 -10   0   0   14369     770                                                       16828   -9.27    0.00  1.0000
 -10   0   0   15869     740                                                       18448   -9.27    0.00  1.0000
  10   0   0   14147     750                                                       16588   -9.27    0.00  1.0000
   0 -10   0   15015     810                                                       17528   -9.28    0.00  1.0000
   0 -10   0   15682     770                                                       18248   -9.28    0.00  1.0000
  10   0   0   15053     720                                                       17568   -9.27    0.00  1.0000
 -10   0   0   14535     800                                                       17008   -9.27    0.00  1.0000
 -10   0   0   13852     760                                                       16268   -9.27    0.00  1.0000
   0  10   0   15005     750                                                       17518   -9.28    0.00  1.0000
  10   0   0   14443     770                                                       16908   -9.27    0.00  1.0000
 -10   0   0   14720     810                                                       17208   -9.27    0.00  1.0000
   0 -10   0   15682     780                                                       18248   -9.28    0.00  1.0000
  10   0   0   14350     770                                                       16808   -9.27    0.00  1.0000
  10   0   0   15415     780                                                       17958   -9.27    0.00  1.0000
   0  10   0   14867     730                                                       17368   -9.28    0.00  1.0000
   0 -10   0   14783     780                                                       17278   -9.28    0.00  1.0000
  10   0   0   15063     750                                                       17578   -9.27    0.00  1.0000
 -10   0   0   15322     710                                                       17858   -9.27    0.00  1.0000
  10   0   0   15063     750                                                       17578   -9.27    0.00  1.0000
   0 -10   0   14839     750                                                       17338   -9.28    0.00  1.0000
 -10   0   0   14887     720                                                       17388   -9.27    0.00  1.0000
  -2 -10   0   46581    1980                                                       50225    7.82    0.00  1.0000
  -2 -10   0   47380    1990                                                       51055    7.82    0.00  1.0000
 -10   2   0   47105    2000                                                       50765    7.81    0.00  1.0000
 -10   2   0   46046    1970                                                       49665    7.81    0.00  1.0000
  10  -2   0   47674    2030                                                       51355    7.81    0.00  1.0000
   2  10   0   46455    2070                                                       50095    7.82    0.00  1.0000
 -10   2   0   44458    2030                                                       48015    7.81    0.00  1.0000
  10  -2   0   46055    2040                                                       49675    7.81    0.00  1.0000
  10  -2   0   47346    2010                                                       51015    7.81    0.00  1.0000
   2  10   0   46003    2050                                                       49625    7.82    0.00  1.0000
 -10   2   0   47047    1960                                                       50705    7.81    0.00  1.0000
 -10   2   0   46431    2070                                                       50065    7.81    0.00  1.0000
  -2 -10   0   46908    1940                                                       50565    7.82    0.00  1.0000
 -10   2   0   46161    1950                                                       49785    7.81    0.00  1.0000
   2  10   0   46889    1960                                                       50545    7.82    0.00  1.0000
  -2 -10   0   47438    1990                                                       51115    7.82    0.00  1.0000
 -10   2   0   45362    2000                                                       48955    7.81    0.00  1.0000
  10  -2   0   44323    2000                                                       47875    7.81    0.00  1.0000
  10  -2   0   45256    1960                                                       48845    7.81    0.00  1.0000
  -2 -10   0   47178    1960                                                       50845    7.82    0.00  1.0000
  10  -2   0   44852    2020                                                       48425    7.81    0.00  1.0000
   2  10   0   45935    2020                                                       49555    7.82    0.00  1.0000
  10  -2   0   47144    1970                                                       50805    7.81    0.00  1.0000
   2  10   0   48623    2020                                                       52345    7.82    0.00  1.0000
   2  10   0   47226    2040                                                       50895    7.82    0.00  1.0000
  -2 -10   0   46205    1960                                                       49835    7.82    0.00  1.0000
 -10   2   0   48406    2050                                                       52115    7.81    0.00  1.0000
   2  10   0   45926    2000                                                       49545    7.82    0.00  1.0000
  -2 -10   0   48690    2000                                                       52415    7.82    0.00  1.0000
  10  -2   0   46643    2000                                                       50285    7.81    0.00  1.0000
  -2 -10   0   51968    1980                                                       55814    7.82    0.00  1.0000
  -2 -10   0   47573    2050                                                       51255    7.82    0.00  1.0000
  -2 -10   0   46889    2010                                                       50545    7.82    0.00  1.0000
  -2 -10   0   47130    2050                                                       50795    7.82    0.00  1.0000
  -2 -10   0   47997    2000                                                       51695    7.82    0.00  1.0000
   2  10   0   46417    1960                                                       50055    7.82    0.00  1.0000
 -10   2   0   47221    2010                                                       50885    7.81    0.00  1.0000
  10  -2   0   45410    2010                                                       49005    7.81    0.00  1.0000
 -10   2   0   46489    2030                                                       50125    7.81    0.00  1.0000
  10  -4   0   22838    1080                                                       25797   -8.93    0.00  1.0000
  10  -4   0   21560    1060                                                       24438   -8.93    0.00  1.0000
 -10   4   0   20837    1020                                                       23668   -8.93    0.00  1.0000
  10  -4   0   22480    1000                                                       25417   -8.93    0.00  1.0000
  -4 -10   0   22140    1080                                                       25057   -8.94    0.00  1.0000
  -4 -10   0   21182    1000                                                       24038   -8.94    0.00  1.0000
   4  10   0   22422     990                                                       25357   -8.94    0.00  1.0000
   4  10   0   21849    1060                                                       24748   -8.94    0.00  1.0000
  10  -4   0   20509    1110                                                       23318   -8.93    0.00  1.0000
  10  -4   0   21532    1020                                                       24408   -8.93    0.00  1.0000
  -4 -10   0   22948    1000                                                       25917   -8.94    0.00  1.0000
 -10   4   0   23817    1110                                                       26837   -8.93    0.00  1.0000
   4  10   0   21549    1040                                                       24428   -8.94    0.00  1.0000
   4  10   0   21286    1040                                                       24148   -8.94    0.00  1.0000
 -10   4   0   21344    1030                                                       24208   -8.93    0.00  1.0000
  -4 -10   0   21708    1070                                                       24598   -8.94    0.00  1.0000
  10  -4   0   22123    1100                                                       25037   -8.93    0.00  1.0000
 -10   4   0   19919    1010                                                       22688   -8.93    0.00  1.0000
   4  10   0   21379    1010                                                       24248   -8.94    0.00  1.0000
   4  10   0   20816    1090                                                       23648   -8.94    0.00  1.0000
  10  -4   0   22030    1090                                                       24938   -8.93    0.00  1.0000
  10  -4   0   20922    1070                                                       23758   -8.93    0.00  1.0000
 -10   4   0   21241    1070                                                       24098   -8.93    0.00  1.0000
  10  -4   0   23487    1120                                                       26487   -8.93    0.00  1.0000
  -4 -10   0   21830    1020                                                       24728   -8.94    0.00  1.0000
  -4 -10   0   21953     990                                                       24858   -8.94    0.00  1.0000
 -10   4   0   22002    1120                                                       24908   -8.93    0.00  1.0000
 -10   4   0   22979    1160                                                       25947   -8.93    0.00  1.0000
 -10   4   0   22687    1110                                                       25637   -8.93    0.00  1.0000
  -4 -10   0   21098     990                                                       23948   -8.94    0.00  1.0000
   4  10   0   21389     980                                                       24258   -8.94    0.00  1.0000
 -10   4   0   20856    1070                                                       23688   -8.93    0.00  1.0000
  -4 -10   0   22281    1010                                                       25207   -8.94    0.00  1.0000
   4  10   0   20029    1020                                                       22808   -8.94    0.00  1.0000
  -4 -10   0   21859    1020                                                       24758   -8.94    0.00  1.0000
  10  -4   0   22161    1030                                                       25077   -8.93    0.00  1.0000
 -10   4   0   21588    1060                                                       24468   -8.93    0.00  1.0000
   6  10   0   27404    1220                                                       30387    8.26    0.00  1.0000
  10  -6   0   28447    1270                                                       31487    8.27    0.00  1.0000
 -10   6   0   28542    1320                                                       31587    8.27    0.00  1.0000
  -6 -10   0   26844    1210                                                       29797    8.26    0.00  1.0000
 -10   6   0   27991    1350                                                       31007    8.27    0.00  1.0000
 -10   6   0   28067    1290                                                       31087    8.27    0.00  1.0000
  10  -6   0   28542    1320                                                       31587    8.27    0.00  1.0000
   6  10   0   26996    1200                                                       29957    8.26    0.00  1.0000
  -6 -10   0   26568    1170                                                       29507    8.26    0.00  1.0000
  10  -6   0   28818    1360                                                       31877    8.27    0.00  1.0000
   6  10   0   26834    1240                                                       29787    8.26    0.00  1.0000
   6  10   0   26977    1230                                                       29937    8.26    0.00  1.0000
  10  -6   0   27858    1230                                                       30867    8.27    0.00  1.0000
 -10   6   0   29616    1260                                                       32717    8.27    0.00  1.0000
 -10   6   0   28589    1270                                                       31637    8.27    0.00  1.0000
   6  10   0   26350    1180                                                       29277    8.26    0.00  1.0000
  -6 -10   0   28012    1210                                                       31027    8.26    0.00  1.0000
   6  10   0   26037    1280                                                       28947    8.26    0.00  1.0000
   6  10   0   28696    1280                                                       31747    8.26    0.00  1.0000
  -6 -10   0   27195    1190                                                       30167    8.26    0.00  1.0000
 -10   6   0   28266    1340                                                       31297    8.27    0.00  1.0000
  -6 -10   0   27670    1210                                                       30667    8.26    0.00  1.0000
  10  -6   0   25182    1290                                                       28047    8.27    0.00  1.0000
 -10   6   0   27611    1350                                                       30607    8.27    0.00  1.0000
  -6 -10   0   25639    1190                                                       28527    8.26    0.00  1.0000
  10  -6   0   26415    1340                                                       29347    8.27    0.00  1.0000
  10  -6   0   27193    1340                                                       30167    8.27    0.00  1.0000
  10  -6   0   28048    1370                                                       31067    8.27    0.00  1.0000
  -6 -10   0   28896    1190                                                       31957    8.26    0.00  1.0000
  10  -6   0   28703    1260                                                       31757    8.27    0.00  1.0000
  -6 -10   0   27223    1210                                                       30197    8.26    0.00  1.0000
  -6 -10   0   26967    1280                                                       29927    8.26    0.00  1.0000
 -10   6   0   28865    1330                                                       31927    8.27    0.00  1.0000
   6  10   0   25468    1190                                                       28347    8.26    0.00  1.0000
   6  10   0   26331    1230                                                       29257    8.26    0.00  1.0000
 -10   6   0   27582    1400                                                       30577    8.27    0.00  1.0000
  -8 -10   0     339      70                                                         450    2.65    0.00  1.0000
  10  -8   0     614     260                                                         760    2.65    0.00  1.0000
  10  -8   0     659     160                                                         810    2.65    0.00  1.0000
 -10   8   0     322     150                                                         430    2.65    0.00  1.0000
  10  -8   0     418     220                                                         540    2.65    0.00  1.0000
 -10   8   0     731     210                                                         890    2.65    0.00  1.0000
  -8 -10   0     391      70                                                         510    2.65    0.00  1.0000
  10  -8   0     506     190                                                         640    2.65    0.00  1.0000
 -10   8   0     322     270                                                         430    2.65    0.00  1.0000
   8  10   0     551     130                                                         690    2.65    0.00  1.0000
  10  -8   0     313     160                                                         420    2.65    0.00  1.0000
  -8 -10   0     524      80                                                         660    2.65    0.00  1.0000
 -10   8   0     211     180                                                         300    2.65    0.00  1.0000
 -10   8   0     758     240                                                         920    2.65    0.00  1.0000
  10  -8   0     623     220                                                         770    2.65    0.00  1.0000
  -8 -10   0     426      80                                                         550    2.65    0.00  1.0000
  -8 -10   0     219     140                                                         310    2.65    0.00  1.0000
 -10   8   0     374     150                                                         490    2.65    0.00  1.0000
  10  -8   0     427     150                                                         550    2.65    0.00  1.0000
  -8 -10   0     533     100                                                         670    2.65    0.00  1.0000
 -10   8   0     296     230                                                         400    2.65    0.00  1.0000
   8  10   0     488      80                                                         620    2.65    0.00  1.0000
 -10   8   0     383     140                                                         500    2.65    0.00  1.0000
  -8 -10   0     497     150                                                         630    2.65    0.00  1.0000
  10  -8   0     704     150                                                         860    2.65    0.00  1.0000
   8  10   0     356     120                                                         470    2.65    0.00  1.0000
  10  -8   0     418     190                                                         540    2.65    0.00  1.0000
   8  10   0     551     130                                                         690    2.65    0.00  1.0000
   8  10   0     462     110                                                         590    2.65    0.00  1.0000
   8  10   0     488     100                                                         620    2.65    0.00  1.0000
  -8 -10   0     391     100                                                         510    2.65    0.00  1.0000
  10  10   0   45353    1980                                                       49305   -8.57    0.00  1.0000
 -10 -10   0   50854    2050                                                       55034   -8.57    0.00  1.0000
  10  10   0   43483    1970                                                       47355   -8.57    0.00  1.0000
 -10  10   0   54624    2300                                                       58954   -8.57    0.00  1.0000
  10  10   0   48971    1960                                                       53075   -8.57    0.00  1.0000
 -10 -10   0   46331    1970                                                       50325   -8.57    0.00  1.0000
  10 -10   0   46619    2080                                                       50625   -8.57    0.00  1.0000
  10 -10   0   50537    2210                                                       54705   -8.57    0.00  1.0000
 -10 -10   0   51075    2040                                                       55264   -8.57    0.00  1.0000
  10  10   0   45017    2020                                                       48955   -8.57    0.00  1.0000
 -10 -10   0   49740    2060                                                       53875   -8.57    0.00  1.0000
 -10  10   0   51777    2220                                                       55994   -8.57    0.00  1.0000
 -10 -10   0   44940    1950                                                       48875   -8.57    0.00  1.0000
 -10 -10   0   48270    1990                                                       52345   -8.57    0.00  1.0000
 -10  10   0   46571    2230                                                       50575   -8.57    0.00  1.0000
  10 -10   0   48155    2190                                                       52225   -8.57    0.00  1.0000
  10 -10   0   49663    2160                                                       53795   -8.57    0.00  1.0000
  10 -10   0   43378    2040                                                       47245   -8.57    0.00  1.0000
 -10  10   0   49144    2140                                                       53255   -8.57    0.00  1.0000
 -10  10   0   46273    2070                                                       50265   -8.57    0.00  1.0000
  10  10   0   47089    1990                                                       51115   -8.57    0.00  1.0000
  10 -10   0   46024    2080                                                       50005   -8.57    0.00  1.0000
  10 -10   0   45084    2130                                                       49025   -8.57    0.00  1.0000
 -10  10   0   45698    2080                                                       49665   -8.57    0.00  1.0000
 -10  10   0   42726    2140                                                       46565   -8.57    0.00  1.0000
  10 -10   0   49010    2190                                                       53115   -8.57    0.00  1.0000
 -10 -10   0   47272    1950                                                       51305   -8.57    0.00  1.0000
  10 -10   0   44490    2250                                                       48405   -8.57    0.00  1.0000
  11   9   0   17113     650                                                       15768   -4.94    0.00  1.0000
   9 -11   0   15569     870                                                       14289    4.93    0.00  1.0000
  11   9   0   16144     690                                                       14839   -4.94    0.00  1.0000
 -11  -9   0   18018     670                                                       16638   -4.94    0.00  1.0000
  -9  11   0   17715     810                                                       16348    4.93    0.00  1.0000
   9 -11   0   18890     850                                                       17478    4.93    0.00  1.0000
  -9  11   0   17725     890                                                       16358    4.93    0.00  1.0000
  -9  11   0   16788     760                                                       15458    4.93    0.00  1.0000
   9 -11   0   17621     820                                                       16258    4.93    0.00  1.0000
  -9  11   0   17184     790                                                       15838    4.93    0.00  1.0000
  11   9   0   17467     660                                                       16108   -4.94    0.00  1.0000
 -11  -9   0   17310     720                                                       15958   -4.94    0.00  1.0000
 -11  -9   0   16009     690                                                       14709   -4.94    0.00  1.0000
   9 -11   0   16882     890                                                       15548    4.93    0.00  1.0000
   9 -11   0   17278     760                                                       15928    4.93    0.00  1.0000
 -11  -9   0   16685     640                                                       15358   -4.94    0.00  1.0000
   9 -11   0   18006     880                                                       16628    4.93    0.00  1.0000
  -9  11   0   17267     830                                                       15918    4.93    0.00  1.0000
   9 -11   0   17684     870                                                       16318    4.93    0.00  1.0000
   9 -11   0   16652     820                                                       15328    4.93    0.00  1.0000
   9 -11   0   17757     780                                                       16388    4.93    0.00  1.0000
 -11  -9   0   16800     710                                                       15468   -4.94    0.00  1.0000
  -9  11   0   17340     960                                                       15988    4.93    0.00  1.0000
  -9  11   0   17121     750                                                       15778    4.93    0.00  1.0000
   7 -11   0  145622    5729                                                      144446    1.45    0.00  1.0000
  -7  11   0  147238    5789                                                      146055    1.45    0.00  1.0000
   7 -11   0  146736    5889                                                      145555    1.45    0.00  1.0000
   7 -11   0  150822    5699                                                      149625    1.45    0.00  1.0000
 -11  -7   0  143653    5539                                                      142486   -1.45    0.00  1.0000
  11   7   0  147508    5559                                                      146325   -1.45    0.00  1.0000
  -7  11   0  146645    5699                                                      145465    1.45    0.00  1.0000
 -11  -7   0  147899    5519                                                      146715   -1.45    0.00  1.0000
   7 -11   0  148061    5749                                                      146875    1.45    0.00  1.0000
   7 -11   0  148593    5639                                                      147405    1.45    0.00  1.0000
  -7  11   0  146324    5619                                                      145145    1.45    0.00  1.0000
  -7  11   0  154306    5629                                                      153095    1.45    0.00  1.0000
 -11  -7   0  142077    5559                                                      140916   -1.45    0.00  1.0000
   7 -11   0  151354    5719                                                      150155    1.45    0.00  1.0000
  -7  11   0  150230    5719                                                      149035    1.45    0.00  1.0000
  -7  11   0  146937    5639                                                      145755    1.45    0.00  1.0000
  11   7   0  145511    5539                                                      144336   -1.45    0.00  1.0000
  11   7   0  146925    5559                                                      145745   -1.45    0.00  1.0000
   7 -11   0  146906    5719                                                      145725    1.45    0.00  1.0000
 -11  -7   0  145280    5529                                                      144106   -1.45    0.00  1.0000
   7 -11   0  153021    5639                                                      151815    1.45    0.00  1.0000
   7 -11   0  145652    5669                                                      144476    1.45    0.00  1.0000
   7 -11   0  157086    5619                                                      155864    1.45    0.00  1.0000
   7 -11   0  151746    5689                                                      150545    1.45    0.00  1.0000
  11   7   0  141625    5529                                                      140466   -1.45    0.00  1.0000
 -11  -7   0  147327    5589                                                      146145   -1.45    0.00  1.0000
   5 -11   0    3387     360                                                        3990   -4.72    0.00  1.0000
  -5  11   0    3378     310                                                        3980   -4.72    0.00  1.0000
  -5  11   0    3139     370                                                        3720   -4.72    0.00  1.0000
  -5  11   0    3268     290                                                        3860   -4.72    0.00  1.0000
  11   5   0    3259     270                                                        3850    4.72    0.00  1.0000
   5 -11   0    2344     360                                                        2850   -4.72    0.00  1.0000
   5 -11   0    2481     330                                                        3000   -4.72    0.00  1.0000
   5 -11   0    3286     420                                                        3880   -4.72    0.00  1.0000
  -5  11   0    4146     480                                                        4810   -4.72    0.00  1.0000
  -5  11   0    2855     290                                                        3410   -4.72    0.00  1.0000
   5 -11   0    3157     350                                                        3740   -4.72    0.00  1.0000
 -11  -5   0    3296     300                                                        3890    4.72    0.00  1.0000
 -11  -5   0    2819     220                                                        3370    4.72    0.00  1.0000
  -5  11   0    2663     380                                                        3200   -4.72    0.00  1.0000
   5 -11   0    2736     320                                                        3280   -4.72    0.00  1.0000
   5 -11   0    2344     350                                                        2850   -4.72    0.00  1.0000
  11   5   0    2901     220                                                        3460    4.72    0.00  1.0000
 -11  -5   0    2874     200                                                        3430    4.72    0.00  1.0000
  11   5   0    2929     230                                                        3490    4.72    0.00  1.0000
 -11  -5   0    3277     220                                                        3870    4.72    0.00  1.0000
  -5  11   0    2754     340                                                        3300   -4.72    0.00  1.0000
   5 -11   0    2745     270                                                        3290   -4.72    0.00  1.0000
  11   5   0    3526     250                                                        4140    4.72    0.00  1.0000
  -5  11   0    3415     300                                                        4020   -4.72    0.00  1.0000
   5 -11   0    3729     360                                                        4360   -4.72    0.00  1.0000
   3 -11   0    3599     340                                                        2990    5.03    0.00  1.0000
  11   3   0    4165     180                                                        3510   -5.01    0.00  1.0000
  -3  11   0    4352     280                                                        3680    5.03    0.00  1.0000
   3 -11   0    3588     310                                                        2980    5.03    0.00  1.0000
 -11  -3   0    4023     230                                                        3380   -5.01    0.00  1.0000
  11   3   0    4176     230                                                        3520   -5.01    0.00  1.0000
  11   3   0    3903     160                                                        3270   -5.01    0.00  1.0000
  -3  11   0    3873     280                                                        3240    5.03    0.00  1.0000
  -3  11   0    4135     250                                                        3480    5.03    0.00  1.0000
  -3  11   0    3665     350                                                        3050    5.03    0.00  1.0000
 -11  -3   0    4165     190                                                        3510   -5.01    0.00  1.0000
  -3  11   0    4374     340                                                        3700    5.03    0.00  1.0000
  11   3   0    4067     200                                                        3420   -5.01    0.00  1.0000
   3 -11   0    4004     360                                                        3360    5.03    0.00  1.0000
   3 -11   0    3905     300                                                        3270    5.03    0.00  1.0000
 -11  -3   0    4285     220                                                        3620   -5.01    0.00  1.0000
  11   3   0    4480     230                                                        3800   -5.01    0.00  1.0000
 -11  -3   0    3991     210                                                        3350   -5.01    0.00  1.0000
   3 -11   0    4091     280                                                        3440    5.03    0.00  1.0000
  11   3   0    3728     220                                                        3110   -5.01    0.00  1.0000
 -11  -3   0    3892     270                                                        3260   -5.01    0.00  1.0000
   3 -11   0    3982     330                                                        3340    5.03    0.00  1.0000
 -11  -3   0    4045     250                                                        3400   -5.01    0.00  1.0000
  -3  11   0    4167     370                                                        3510    5.03    0.00  1.0000
  -3  11   0    3730     310                                                        3110    5.03    0.00  1.0000
  -3  11   0    3632     250                                                        3020    5.03    0.00  1.0000
   3 -11   0    4428     320                                                        3750    5.03    0.00  1.0000
  -3  11   0    4819     410                                                        4110    5.03    0.00  1.0000
 -11  -3   0    4372     280                                                        3700   -5.01    0.00  1.0000
 -11  -3   0    4056     170                                                        3410   -5.01    0.00  1.0000
 -11  -3   0    3870     200                                                        3240   -5.01    0.00  1.0000
   3 -11   0    4385     370                                                        3710    5.03    0.00  1.0000
  11   3   0    3925     240                                                        3290   -5.01    0.00  1.0000
   3 -11   0    4797     320                                                        4090    5.03    0.00  1.0000
   3 -11   0    4494     290                                                        3810    5.03    0.00  1.0000
  11   3   0    3947     190                                                        3310   -5.01    0.00  1.0000
   3 -11   0    3883     260                                                        3250    5.03    0.00  1.0000
  -1  11   0   24821    1100                                                       27537   -7.90    0.00  1.0000
  11   1   0   23828    1100                                                       26487    7.89    0.00  1.0000
   1 -11   0   24640    1160                                                       27347   -7.90    0.00  1.0000
  11   1   0   24416    1110                                                       27107    7.89    0.00  1.0000
  11   1   0   23278    1050                                                       25907    7.89    0.00  1.0000
  11   1   0   24093    1050                                                       26767    7.89    0.00  1.0000
   1 -11   0   23407    1140                                                       26047   -7.90    0.00  1.0000
 -11  -1   0   23761    1100                                                       26417    7.89    0.00  1.0000
  -1  11   0   24754    1160                                                       27467   -7.90    0.00  1.0000
   1 -11   0   23891    1140                                                       26557   -7.90    0.00  1.0000
 -11  -1   0   23230    1140                                                       25857    7.89    0.00  1.0000
  11   1   0   23107    1090                                                       25727    7.89    0.00  1.0000
 -11  -1   0   23866    1060                                                       26527    7.89    0.00  1.0000
 -11  -1   0   23733    1090                                                       26387    7.89    0.00  1.0000
 -11  -1   0   23695    1100                                                       26347    7.89    0.00  1.0000
  -1  11   0   25362    1240                                                       28107   -7.90    0.00  1.0000
   1 -11   0   23720    1110                                                       26377   -7.90    0.00  1.0000
  -1  11   0   23483    1090                                                       26127   -7.90    0.00  1.0000
   1 -11   0   22858    1110                                                       25467   -7.90    0.00  1.0000
  11   1   0   24359    1080                                                       27047    7.89    0.00  1.0000
   1 -11   0   25068    1100                                                       27797   -7.90    0.00  1.0000
   1 -11   0   23379    1130                                                       26017   -7.90    0.00  1.0000
  11   1   0   23268    1090                                                       25897    7.89    0.00  1.0000
 -11  -1   0   24938    1080                                                       27657    7.89    0.00  1.0000
   1 -11   0   24982    1140                                                       27707   -7.90    0.00  1.0000
   1 -11   0   24868    1220                                                       27587   -7.90    0.00  1.0000
  -1  11   0   22338    1180                                                       24918   -7.90    0.00  1.0000
  -1  11   0   24593    1230                                                       27297   -7.90    0.00  1.0000
   1 -11   0   22120    1190                                                       24688   -7.90    0.00  1.0000
  -1  11   0   23758    1160                                                       26417   -7.90    0.00  1.0000
   1 -11   0   23673    1110                                                       26327   -7.90    0.00  1.0000
 -11  -1   0   22681    1050                                                       25277    7.89    0.00  1.0000
  -1  11   0   24574    1110                                                       27277   -7.90    0.00  1.0000
  11   1   0   24074    1100                                                       26747    7.89    0.00  1.0000
   1 -11   0   23806    1180                                                       26467   -7.90    0.00  1.0000
 -11  -1   0   24255    1130                                                       26937    7.89    0.00  1.0000
  11   1   0   24464    1090                                                       27157    7.89    0.00  1.0000
  -1 -11   0   23181    1100                                                       25807    7.90    0.00  1.0000
  11  -1   0   24187    1070                                                       26867   -7.89    0.00  1.0000
 -11   1   0   23172    1130                                                       25797   -7.89    0.00  1.0000
  -1 -11   0   22802    1110                                                       25407    7.90    0.00  1.0000
  11  -1   0   23845    1130                                                       26507   -7.89    0.00  1.0000
 -11   1   0   24519    1160                                                       27217   -7.89    0.00  1.0000
   1  11   0   24461    1090                                                       27157    7.90    0.00  1.0000
   1  11   0   23001    1080                                                       25617    7.90    0.00  1.0000
   1  11   0   24272    1150                                                       26957    7.90    0.00  1.0000
  -1 -11   0   22613    1170                                                       25207    7.90    0.00  1.0000
   1  11   0   23039    1080                                                       25657    7.90    0.00  1.0000
 -11   1   0   25146    1030                                                       27877   -7.89    0.00  1.0000
   1  11   0   24832    1190                                                       27547    7.90    0.00  1.0000
  -1 -11   0   23968    1150                                                       26637    7.90    0.00  1.0000
  11  -1   0   23002    1110                                                       25617   -7.89    0.00  1.0000
  -1 -11   0   23693    1110                                                       26347    7.90    0.00  1.0000
  -1 -11   0   23845    1180                                                       26507    7.90    0.00  1.0000
  -1 -11   0   23304    1090                                                       25937    7.90    0.00  1.0000
  11  -1   0   24472    1100                                                       27167   -7.89    0.00  1.0000
  11  -1   0   23059    1060                                                       25677   -7.89    0.00  1.0000
 -11   1   0   22330    1160                                                       24908   -7.89    0.00  1.0000
   1  11   0   24072    1160                                                       26747    7.90    0.00  1.0000
 -11   1   0   23106    1130                                                       25727   -7.89    0.00  1.0000
 -11   1   0   23153    1100                                                       25777   -7.89    0.00  1.0000
   1  11   0   24196    1210                                                       26877    7.90    0.00  1.0000
  11  -1   0   22888    1130                                                       25497   -7.89    0.00  1.0000
  -1 -11   0   23930    1080                                                       26597    7.90    0.00  1.0000
  -1 -11   0   23721    1130                                                       26377    7.90    0.00  1.0000
  -1 -11   0   24964    1100                                                       27687    7.90    0.00  1.0000
  11  -1   0   23078    1100                                                       25697   -7.89    0.00  1.0000
  11  -1   0   23883    1110                                                       26547   -7.89    0.00  1.0000
 -11   1   0   24339    1100                                                       27027   -7.89    0.00  1.0000
 -11   1   0   23779    1060                                                       26437   -7.89    0.00  1.0000
  11  -1   0   23229    1130                                                       25857   -7.89    0.00  1.0000
  -1 -11   0   24509    1070                                                       27207    7.90    0.00  1.0000
  -1 -11   0   23475    1090                                                       26117    7.90    0.00  1.0000
  -1 -11   0   23987    1130                                                       26657    7.90    0.00  1.0000
 -11   1   0   24083    1070                                                       26757   -7.89    0.00  1.0000
 -11   3   0    3717     240                                                        3100    5.01    0.00  1.0000
  -3 -11   0    4731     340                                                        4030   -5.02    0.00  1.0000
 -11   3   0    3947     310                                                        3310    5.01    0.00  1.0000
   3  11   0    4622     330                                                        3930   -5.02    0.00  1.0000
   3  11   0    4449     300                                                        3770   -5.02    0.00  1.0000
 -11   3   0    4643     260                                                        3950    5.01    0.00  1.0000
   3  11   0    4449     310                                                        3770   -5.02    0.00  1.0000
  -3 -11   0    4013     200                                                        3370   -5.02    0.00  1.0000
   3  11   0    4297     220                                                        3630   -5.02    0.00  1.0000
   3  11   0    4329     300                                                        3660   -5.02    0.00  1.0000
 -11   3   0    3772     330                                                        3150    5.01    0.00  1.0000
  11  -3   0    3805     280                                                        3180    5.01    0.00  1.0000
   3  11   0    3707     330                                                        3090   -5.02    0.00  1.0000
  11  -3   0    3947     320                                                        3310    5.01    0.00  1.0000
  -3 -11   0    4253     240                                                        3590   -5.02    0.00  1.0000
 -11   3   0    5357     400                                                        4610    5.01    0.00  1.0000
  -3 -11   0    3937     240                                                        3300   -5.02    0.00  1.0000
   3  11   0    3904     260                                                        3270   -5.02    0.00  1.0000
   3  11   0    4264     230                                                        3600   -5.02    0.00  1.0000
  11  -3   0    3761     290                                                        3140    5.01    0.00  1.0000
  -3 -11   0    3641     250                                                        3030   -5.02    0.00  1.0000
  -3 -11   0    3565     260                                                        2960   -5.02    0.00  1.0000
 -11   3   0    4328     290                                                        3660    5.01    0.00  1.0000
  11  -3   0    4708     290                                                        4010    5.01    0.00  1.0000
 -11   3   0    3717     300                                                        3100    5.01    0.00  1.0000
  11  -3   0    4502     340                                                        3820    5.01    0.00  1.0000
  11  -3   0    4154     300                                                        3500    5.01    0.00  1.0000
 -11   3   0    4296     300                                                        3630    5.01    0.00  1.0000
  11  -3   0    4013     240                                                        3370    5.01    0.00  1.0000
  11  -3   0    3816     230                                                        3190    5.01    0.00  1.0000
  -3 -11   0    3838     270                                                        3210   -5.02    0.00  1.0000
  -3 -11   0    4046     180                                                        3400   -5.02    0.00  1.0000
  -3 -11   0    4220     230                                                        3560   -5.02    0.00  1.0000
  -3 -11   0    3991     240                                                        3350   -5.02    0.00  1.0000
  11  -3   0    3608     320                                                        3000    5.01    0.00  1.0000
  -3 -11   0    4481     330                                                        3800   -5.02    0.00  1.0000
 -11   3   0    4654     310                                                        3960    5.01    0.00  1.0000
 -11   3   0    3641     220                                                        3030    5.01    0.00  1.0000
 -11   5   0    3869     350                                                        4510   -4.71    0.00  1.0000
  11  -5   0    2911     340                                                        3470   -4.71    0.00  1.0000
  -5 -11   0    2902     260                                                        3460    4.71    0.00  1.0000
 -11   5   0    2847     330                                                        3400   -4.71    0.00  1.0000
 -11   5   0    2228     250                                                        2720   -4.71    0.00  1.0000
   5  11   0    2929     210                                                        3490    4.71    0.00  1.0000
  11  -5   0    3591     280                                                        4210   -4.71    0.00  1.0000
   5  11   0    3278     270                                                        3870    4.71    0.00  1.0000
 -11   5   0    2155     350                                                        2640   -4.71    0.00  1.0000
 -11   5   0    3619     380                                                        4240   -4.71    0.00  1.0000
   5  11   0    2948     280                                                        3510    4.71    0.00  1.0000
   5  11   0    2838     220                                                        3390    4.71    0.00  1.0000
  -5 -11   0    3223     260                                                        3810    4.71    0.00  1.0000
  -5 -11   0    3205     230                                                        3790    4.71    0.00  1.0000
  11  -5   0    2947     300                                                        3510   -4.71    0.00  1.0000
  -5 -11   0    2975     320                                                        3540    4.71    0.00  1.0000
  11  -5   0    2719     350                                                        3260   -4.71    0.00  1.0000
  11  -5   0    4036     360                                                        4690   -4.71    0.00  1.0000
  11  -5   0    2911     350                                                        3470   -4.71    0.00  1.0000
   5  11   0    3592     310                                                        4210    4.71    0.00  1.0000
  -5 -11   0    3012     250                                                        3580    4.71    0.00  1.0000
   5  11   0    3223     290                                                        3810    4.71    0.00  1.0000
 -11   5   0    2938     270                                                        3500   -4.71    0.00  1.0000
   5  11   0    3601     270                                                        4220    4.71    0.00  1.0000
  -5 -11   0    3067     230                                                        3640    4.71    0.00  1.0000
 -11   5   0    3057     280                                                        3630   -4.71    0.00  1.0000
  -5 -11   0    3085     250                                                        3660    4.71    0.00  1.0000
 -11   5   0    3260     370                                                        3850   -4.71    0.00  1.0000
 -11   5   0    3499     330                                                        4110   -4.71    0.00  1.0000
  11  -5   0    2975     550                                                        3540   -4.71    0.00  1.0000
  11  -5   0    2355     300                                                        2860   -4.71    0.00  1.0000
  11  -5   0    3352     280                                                        3950   -4.71    0.00  1.0000
  11  -5   0    3113     240                                                        3690   -4.71    0.00  1.0000
 -11   5   0    2874     340                                                        3430   -4.71    0.00  1.0000
  -5 -11   0    3555     320                                                        4170    4.71    0.00  1.0000
   5  11   0    3416     340                                                        4020    4.71    0.00  1.0000
  -5 -11   0    3186     260                                                        3770    4.71    0.00  1.0000
  -7 -11   0  148094    5529                                                      146915   -1.44    0.00  1.0000
  -7 -11   0  144862    5509                                                      143696   -1.44    0.00  1.0000
 -11   7   0  149136    5629                                                      147945    1.45    0.00  1.0000
   7  11   0  142482    5539                                                      141326   -1.44    0.00  1.0000
  -7 -11   0  147341    5539                                                      146165   -1.44    0.00  1.0000
 -11   7   0  146014    5699                                                      144836    1.45    0.00  1.0000
 -11   7   0  152178    5759                                                      150975    1.45    0.00  1.0000
 -11   7   0  154326    5709                                                      153115    1.45    0.00  1.0000
 -11   7   0  149427    5589                                                      148235    1.45    0.00  1.0000
  11  -7   0  150411    5699                                                      149215    1.45    0.00  1.0000
  -7 -11   0  145504    5599                                                      144336   -1.44    0.00  1.0000
  -7 -11   0  148666    5519                                                      147485   -1.44    0.00  1.0000
  -7 -11   0  147361    5519                                                      146185   -1.44    0.00  1.0000
  11  -7   0  149959    5569                                                      148765    1.45    0.00  1.0000
  11  -7   0  148112    5589                                                      146925    1.45    0.00  1.0000
   7  11   0  152019    5519                                                      150825   -1.44    0.00  1.0000
  11  -7   0  147479    5599                                                      146295    1.45    0.00  1.0000
  11  -7   0  147660    5679                                                      146475    1.45    0.00  1.0000
  -7 -11   0  142131    5529                                                      140976   -1.44    0.00  1.0000
   7  11   0  145966    5589                                                      144796   -1.44    0.00  1.0000
   7  11   0  148475    5519                                                      147295   -1.44    0.00  1.0000
  11  -7   0  147017    5699                                                      145835    1.45    0.00  1.0000
  11  -7   0  146515    5649                                                      145335    1.45    0.00  1.0000
  11  -7   0  143946    5649                                                      142776    1.45    0.00  1.0000
   7  11   0  145755    5569                                                      144586   -1.44    0.00  1.0000
 -11   7   0  146656    5599                                                      145475    1.45    0.00  1.0000
   7  11   0  143958    5549                                                      142796   -1.44    0.00  1.0000
 -11   7   0  145512    5659                                                      144336    1.45    0.00  1.0000
   7  11   0  143155    5559                                                      141996   -1.44    0.00  1.0000
 -11   7   0  147218    5669                                                      146035    1.45    0.00  1.0000
  -9 -11   0   16330     730                                                       15018   -4.93    0.00  1.0000
  -9 -11   0   16507     650                                                       15188   -4.93    0.00  1.0000
 -11   9   0   18163     760                                                       16778    4.93    0.00  1.0000
  11  -9   0   17601     760                                                       16238    4.93    0.00  1.0000
 -11   9   0   18829     840                                                       17418    4.93    0.00  1.0000
  -9 -11   0   16883     730                                                       15548   -4.93    0.00  1.0000
   9  11   0   16123     670                                                       14819   -4.93    0.00  1.0000
  11  -9   0   17851     870                                                       16478    4.93    0.00  1.0000
  11  -9   0   17080     860                                                       15738    4.93    0.00  1.0000
   9  11   0   16424     670                                                       15108   -4.93    0.00  1.0000
   9  11   0   16820     710                                                       15488   -4.93    0.00  1.0000
  -9 -11   0   17091     630                                                       15748   -4.93    0.00  1.0000
   9  11   0   16570     640                                                       15248   -4.93    0.00  1.0000
 -11   9   0   17976     950                                                       16598    4.93    0.00  1.0000
  -9 -11   0   16403     670                                                       15088   -4.93    0.00  1.0000
 -11   9   0   17164     740                                                       15818    4.93    0.00  1.0000
 -11   9   0   16757     820                                                       15428    4.93    0.00  1.0000
  11  -9   0   18007     720                                                       16628    4.93    0.00  1.0000
   9  11   0   15047     680                                                       13789   -4.93    0.00  1.0000
  11  -9   0   16955     750                                                       15618    4.93    0.00  1.0000
 -11   9   0   18309     900                                                       16918    4.93    0.00  1.0000
 -11   9   0   17205     780                                                       15858    4.93    0.00  1.0000
  11  -9   0   17726     880                                                       16358    4.93    0.00  1.0000
  11  -9   0   16611     820                                                       15288    4.93    0.00  1.0000
  11  -9   0   15653     800                                                       14369    4.93    0.00  1.0000
  -9 -11   0   17049     640                                                       15708   -4.93    0.00  1.0000
 -11   9   0   17247     880                                                       15898    4.93    0.00  1.0000
  11  11   0    5844     340                                                        6439    3.57    0.00  1.0000
 -11 -11   0    5292     290                                                        5859    3.57    0.00  1.0000
  11  11   0    6083     300                                                        6689    3.57    0.00  1.0000
 -11 -11   0    6665     320                                                        7299    3.57    0.00  1.0000
 -11 -11   0    8236     420                                                        8939    3.57    0.00  1.0000
 -11 -11   0    7497     360                                                        8169    3.57    0.00  1.0000
  11 -11   0    6951     530                                                        7599   -3.58    0.00  1.0000
 -11  11   0    4363     480                                                        4880   -3.58    0.00  1.0000
 -11  11   0    5187     420                                                        5749   -3.58    0.00  1.0000
  11 -11   0    4628     470                                                        5159   -3.58    0.00  1.0000
  11  11   0    5359     320                                                        5929    3.57    0.00  1.0000
  11 -11   0    4523     410                                                        5049   -3.58    0.00  1.0000
  11  11   0    5901     330                                                        6499    3.57    0.00  1.0000
  11 -11   0    4108     370                                                        4610   -3.58    0.00  1.0000
 -11 -11   0    6760     300                                                        7399    3.57    0.00  1.0000
 -11  11   0    4420     400                                                        4940   -3.58    0.00  1.0000
  11 -11   0    8292     630                                                        8999   -3.58    0.00  1.0000
  11  11   0    6598     380                                                        7229    3.57    0.00  1.0000
  10 -12   0     236     250                                                         220    0.54    0.00  1.0000
 -10  12   0      79     290                                                          70    0.54    0.00  1.0000
  10 -12   0       0     140                                                         -20    0.54    0.00  1.0000
  10 -12   0       0     190                                                         -60    0.54    0.00  1.0000
 -10  12   0     163     250                                                         150    0.54    0.00  1.0000
  12  10   0     122      70                                                         110    0.55    0.00  1.0000
  12  10   0      79     100                                                          70    0.55    0.00  1.0000
  10 -12   0      47     240                                                          40    0.54    0.00  1.0000
 -12 -10   0     101      40                                                          90    0.55    0.00  1.0000
  10 -12   0     121     230                                                         110    0.54    0.00  1.0000
 -12 -10   0     184     110                                                         170    0.55    0.00  1.0000
  10 -12   0       0     180                                                        -260    0.54    0.00  1.0000
  12  10   0     184      80                                                         170    0.55    0.00  1.0000
 -12 -10   0     143     130                                                         130    0.55    0.00  1.0000
 -10  12   0     370     170                                                         350    0.54    0.00  1.0000
 -12 -10   0     226     130                                                         210    0.55    0.00  1.0000
 -12 -10   0      79      60                                                          70    0.55    0.00  1.0000
  12  10   0     122      70                                                         110    0.55    0.00  1.0000
 -10  12   0       0     130                                                         -20    0.54    0.00  1.0000
 -10  12   0      36     180                                                          30    0.54    0.00  1.0000
 -12 -10   0      69      90                                                          60    0.55    0.00  1.0000
 -10  12   0      25     120                                                          20    0.54    0.00  1.0000
 -12 -10   0      58      50                                                          50    0.55    0.00  1.0000
 -10  12   0     121     170                                                         110    0.54    0.00  1.0000
  10 -12   0      47     170                                                          40    0.54    0.00  1.0000
  10 -12   0     142     140                                                         130    0.54    0.00  1.0000
  10 -12   0       0     110                                                         -30    0.54    0.00  1.0000
 -12  -8   0   73771    2800                                                       72833   -1.63    0.00  1.0000
  -8  12   0   76350    3000                                                       75402   -1.62    0.00  1.0000
   8 -12   0   70413    3000                                                       69503   -1.62    0.00  1.0000
 -12  -8   0   72443    2780                                                       71513   -1.63    0.00  1.0000
   8 -12   0   77296    2920                                                       76342   -1.62    0.00  1.0000
 -12  -8   0   72573    2850                                                       71643   -1.63    0.00  1.0000
  -8  12   0   75777    2910                                                       74833   -1.62    0.00  1.0000
   8 -12   0   73966    2960                                                       73033   -1.62    0.00  1.0000
  12   8   0   72030    2790                                                       71103   -1.63    0.00  1.0000
  12   8   0   71607    2800                                                       70683   -1.63    0.00  1.0000
  -8  12   0   73795    2920                                                       72863   -1.62    0.00  1.0000
   8 -12   0   79036    2980                                                       78072   -1.62    0.00  1.0000
  12   8   0   74244    2830                                                       73303   -1.63    0.00  1.0000
   8 -12   0   73412    3040                                                       72483   -1.62    0.00  1.0000
   8 -12   0   77799    3000                                                       76842   -1.62    0.00  1.0000
 -12  -8   0   72060    2810                                                       71133   -1.63    0.00  1.0000
   8 -12   0   73332    3030                                                       72403   -1.62    0.00  1.0000
 -12  -8   0   75311    2840                                                       74363   -1.63    0.00  1.0000
  -8  12   0   72809    2900                                                       71883   -1.62    0.00  1.0000
   8 -12   0   76803    3010                                                       75852   -1.62    0.00  1.0000
  -8  12   0   77457    3030                                                       76502   -1.62    0.00  1.0000
  -8  12   0   73805    3090                                                       72873   -1.62    0.00  1.0000
   8 -12   0   75345    2930                                                       74403   -1.62    0.00  1.0000
  12   6   0    1457     170                                                        1680    2.66    0.00  1.0000
  -6  12   0    1225     210                                                        1430    2.65    0.00  1.0000
   6 -12   0    1290     190                                                        1500    2.65    0.00  1.0000
   6 -12   0    2048     320                                                        2310    2.65    0.00  1.0000
 -12  -6   0    1281     140                                                        1490    2.66    0.00  1.0000
   6 -12   0    1392     300                                                        1610    2.65    0.00  1.0000
  12   6   0    1170     160                                                        1370    2.66    0.00  1.0000
  -6  12   0    1244     220                                                        1450    2.65    0.00  1.0000
   6 -12   0    1078     240                                                        1270    2.65    0.00  1.0000
   6 -12   0    1327     240                                                        1540    2.65    0.00  1.0000
   6 -12   0    1804     330                                                        2050    2.65    0.00  1.0000
  12   6   0    1467     200                                                        1690    2.66    0.00  1.0000
   6 -12   0    1663     290                                                        1900    2.65    0.00  1.0000
   6 -12   0    1124     250                                                        1320    2.65    0.00  1.0000
  -6  12   0    1598     290                                                        1830    2.65    0.00  1.0000
  12   6   0    1374     150                                                        1590    2.66    0.00  1.0000
   6 -12   0    1467     300                                                        1690    2.65    0.00  1.0000
  -6  12   0    1860     370                                                        2110    2.65    0.00  1.0000
  -6  12   0    1004     240                                                        1190    2.65    0.00  1.0000
  -6  12   0    1188     190                                                        1390    2.65    0.00  1.0000
 -12  -6   0    1253     120                                                        1460    2.66    0.00  1.0000
  -6  12   0    1542     210                                                        1770    2.65    0.00  1.0000
 -12  -6   0    1738     210                                                        1980    2.66    0.00  1.0000
 -12  -6   0    1262     140                                                        1470    2.66    0.00  1.0000
 -12  -4   0   51495    1940                                                       51215    0.58    0.00  1.0000
  -4  12   0   50878    2060                                                       50595    0.59    0.00  1.0000
  12   4   0   49600    2000                                                       49325    0.58    0.00  1.0000
   4 -12   0   51650    2120                                                       51365    0.59    0.00  1.0000
   4 -12   0   52392    2120                                                       52105    0.59    0.00  1.0000
  -4  12   0   52011    2210                                                       51725    0.59    0.00  1.0000
   4 -12   0   52703    2040                                                       52415    0.59    0.00  1.0000
   4 -12   0   52663    2070                                                       52375    0.59    0.00  1.0000
  -4  12   0   49975    2040                                                       49695    0.59    0.00  1.0000
   4 -12   0   51169    2100                                                       50885    0.59    0.00  1.0000
 -12  -4   0   52317    1970                                                       52035    0.58    0.00  1.0000
  -4  12   0   53525    2060                                                       53235    0.59    0.00  1.0000
   4 -12   0   53705    2170                                                       53415    0.59    0.00  1.0000
  12   4   0   52347    1990                                                       52065    0.58    0.00  1.0000
   4 -12   0   52522    2180                                                       52235    0.59    0.00  1.0000
   4 -12   0   47428    2070                                                       47155    0.59    0.00  1.0000
 -12  -4   0   51204    1990                                                       50925    0.58    0.00  1.0000
  12   4   0   50652    1990                                                       50375    0.58    0.00  1.0000
  12   4   0   53179    1980                                                       52895    0.58    0.00  1.0000
 -12  -4   0   50352    2040                                                       50075    0.58    0.00  1.0000
 -12  -4   0   49138    1960                                                       48865    0.58    0.00  1.0000
 -12  -4   0   49289    1990                                                       49015    0.58    0.00  1.0000
  -4  12   0   51128    2120                                                       50845    0.59    0.00  1.0000
  -4  12   0   52542    2040                                                       52255    0.59    0.00  1.0000
  -4  12   0   50447    2120                                                       50165    0.59    0.00  1.0000
   4 -12   0   52612    2120                                                       52325    0.59    0.00  1.0000
   4 -12   0   51660    2060                                                       51375    0.59    0.00  1.0000
   4 -12   0   50868    2140                                                       50585    0.59    0.00  1.0000
   2 -12   0      24     130                                                         150   -6.97    0.00  1.0000
  12   2   0      55      90                                                         -40   -6.96    0.00  1.0000
   2 -12   0       4     170                                                          30   -6.97    0.00  1.0000
 -12  -2   0       2     140                                                          70   -6.96    0.00  1.0000
   2 -12   0       4     100                                                          30   -6.97    0.00  1.0000
 -12  -2   0      18      80                                                          10   -6.96    0.00  1.0000
  -2  12   0      55      90                                                         -90   -6.97    0.00  1.0000
  12   2   0      18      70                                                          10   -6.96    0.00  1.0000
  -2  12   0      17     100                                                         130   -6.97    0.00  1.0000
 -12  -2   0      55     120                                                        -120   -6.96    0.00  1.0000
  -2  12   0      28     100                                                         160   -6.97    0.00  1.0000
   2 -12   0       7     110                                                         100   -6.97    0.00  1.0000
   2 -12   0      55     120                                                         -50   -6.97    0.00  1.0000
  12   2   0      55      90                                                         -20   -6.96    0.00  1.0000
  -2  12   0       2     170                                                          70   -6.97    0.00  1.0000
  -2  12   0       4     200                                                          30   -6.97    0.00  1.0000
   2 -12   0      55      90                                                        -100   -6.97    0.00  1.0000
   2 -12   0      55     110                                                        -110   -6.97    0.00  1.0000
 -12  -2   0      29      80                                                         160   -6.96    0.00  1.0000
  12   2   0      18      80                                                          10   -6.96    0.00  1.0000
 -12  -2   0       1     100                                                          50   -6.96    0.00  1.0000
  -2  12   0       9     140                                                          20   -6.97    0.00  1.0000
 -12  -2   0      55      90                                                         -40   -6.96    0.00  1.0000
 -12  -2   0       2      60                                                          70   -6.96    0.00  1.0000
  12   2   0      55     100                                                         -20   -6.96    0.00  1.0000
   2 -12   0      55     150                                                        -120   -6.97    0.00  1.0000
  12   2   0      55      80                                                         -80   -6.96    0.00  1.0000
  12   2   0       2      80                                                          70   -6.96    0.00  1.0000
   2 -12   0      55     160                                                         -70   -6.97    0.00  1.0000
   2 -12   0      55     160                                                        -100   -6.97    0.00  1.0000
  -2  12   0      55     130                                                        -170   -6.97    0.00  1.0000
   2 -12   0      55     140                                                         -30   -6.97    0.00  1.0000
   0  12   0  132027    4999                                                      124388   10.05    0.00  1.0000
  12   0   0  134179    4960                                                      126477   10.05    0.00  1.0000
   0 -12   0  137876    4970                                                      130067   10.05    0.00  1.0000
  12   0   0  138720    4930                                                      130887   10.05    0.00  1.0000
   0 -12   0  138834    4990                                                      130997   10.05    0.00  1.0000
   0  12   0  139297    4910                                                      131447   10.05    0.00  1.0000
   0  12   0  130410    5069                                                      122818   10.05    0.00  1.0000
   0 -12   0  135024    4950                                                      127297   10.05    0.00  1.0000
  12   0   0  138772    4960                                                      130937   10.05    0.00  1.0000
   0 -12   0  140995    4950                                                      133097   10.05    0.00  1.0000
 -12   0   0  135909    4900                                                      128157   10.05    0.00  1.0000
 -12   0   0  138669    4999                                                      130837   10.05    0.00  1.0000
   0 -12   0  130204    4960                                                      122618   10.05    0.00  1.0000
 -12   0   0  134200    4930                                                      126497   10.05    0.00  1.0000
 -12   0   0  135096    4960                                                      127367   10.05    0.00  1.0000
  12   0   0  134262    4890                                                      126557   10.05    0.00  1.0000
 -12   0   0  139359    4910                                                      131507   10.05    0.00  1.0000
   0  12   0  137804    4930                                                      129997   10.05    0.00  1.0000
   0 -12   0  138813    4970                                                      130977   10.05    0.00  1.0000
   0 -12   0  142025    5009                                                      134097   10.05    0.00  1.0000
   0 -12   0  136115    4930                                                      128357   10.05    0.00  1.0000
  12   0   0  132974    4900                                                      125307   10.05    0.00  1.0000
   0 -12   0  137073    5009                                                      129287   10.05    0.00  1.0000
   0 -12   0  138679    4950                                                      130847   10.05    0.00  1.0000
  12   0   0  134818    4950                                                      127097   10.05    0.00  1.0000
 -12   0   0  141355    4940                                                      133447   10.05    0.00  1.0000
   0  12   0  143917    4940                                                      135936   10.05    0.00  1.0000
 -12   0   0  130750    4960                                                      123148   10.05    0.00  1.0000
 -12   0   0  137660    4980                                                      129857   10.05    0.00  1.0000
   0 -12   0  140985    4940                                                      133087   10.05    0.00  1.0000
  12   0   0  140625    4940                                                      132737   10.05    0.00  1.0000
   0 -12   0  138226    5049                                                      130407   10.05    0.00  1.0000
   0  12   0  135261    5049                                                      127527   10.05    0.00  1.0000
 -12   0   0  138360    4980                                                      130537   10.05    0.00  1.0000
   0  12   0  131007    5019                                                      123398   10.05    0.00  1.0000
  12   0   0  136260    4960                                                      128497   10.05    0.00  1.0000
  12   0   0  134581    4940                                                      126867   10.05    0.00  1.0000
   0 -12   0  139390    5039                                                      131537   10.05    0.00  1.0000
   2  12   0       2      80                                                          40   -6.96    0.00  1.0000
  12  -2   0      55     140                                                         -60   -6.96    0.00  1.0000
   2  12   0      21     130                                                         140   -6.96    0.00  1.0000
   2  12   0       4     130                                                          30   -6.96    0.00  1.0000
  -2 -12   0      10     130                                                         110   -6.96    0.00  1.0000
  12  -2   0       1      70                                                          60   -6.96    0.00  1.0000
   2  12   0      55      70                                                        -120   -6.96    0.00  1.0000
  -2 -12   0      55     140                                                         -30   -6.96    0.00  1.0000
  -2 -12   0      18      90                                                          10   -6.96    0.00  1.0000
  -2 -12   0      55     110                                                         -70   -6.96    0.00  1.0000
  12  -2   0      55     110                                                        -290   -6.96    0.00  1.0000
  12  -2   0      55     110                                                         -50   -6.96    0.00  1.0000
 -12   2   0      21      70                                                         140   -6.96    0.00  1.0000
 -12   2   0      55     110                                                         -20   -6.96    0.00  1.0000
 -12   2   0      55      80                                                           0   -6.96    0.00  1.0000
  -2 -12   0      55      70                                                           0   -6.96    0.00  1.0000
  12  -2   0      18      80                                                          10   -6.96    0.00  1.0000
  12  -2   0      55     130                                                        -170   -6.96    0.00  1.0000
 -12   2   0       1     150                                                          60   -6.96    0.00  1.0000
  12  -2   0      55     100                                                           0   -6.96    0.00  1.0000
 -12   2   0       1      90                                                          60   -6.96    0.00  1.0000
 -12   2   0       2     120                                                          40   -6.96    0.00  1.0000
 -12   2   0       3     110                                                          80   -6.96    0.00  1.0000
  -2 -12   0      55      90                                                         -40   -6.96    0.00  1.0000
 -12   2   0      56     190                                                         220   -6.96    0.00  1.0000
   2  12   0       4     160                                                          30   -6.96    0.00  1.0000
  -2 -12   0      55     130                                                        -100   -6.96    0.00  1.0000
  -2 -12   0      42     120                                                         190   -6.96    0.00  1.0000
  -2 -12   0      55      90                                                         -30   -6.96    0.00  1.0000
  -2 -12   0      55     160                                                        -210   -6.96    0.00  1.0000
 -12   2   0      55     160                                                        -140   -6.96    0.00  1.0000
  -2 -12   0       4     100                                                          30   -6.96    0.00  1.0000
  12  -2   0      55     110                                                         -20   -6.96    0.00  1.0000
   2  12   0      37     160                                                         180   -6.96    0.00  1.0000
  12  -2   0       2     120                                                          40   -6.96    0.00  1.0000
  -2 -12   0       2     110                                                          40   -6.96    0.00  1.0000
 -12   2   0      55     110                                                         -30   -6.96    0.00  1.0000
  -4 -12   0   52677    1930                                                       52395    0.58    0.00  1.0000
   4  12   0   51203    1990                                                       50925    0.58    0.00  1.0000
  12  -4   0   50108    2070                                                       49835    0.58    0.00  1.0000
   4  12   0   53118    2070                                                       52835    0.58    0.00  1.0000
   4  12   0   54362    2090                                                       54075    0.58    0.00  1.0000
  12  -4   0   49406    2070                                                       49135    0.58    0.00  1.0000
   4  12   0   50211    2050                                                       49935    0.58    0.00  1.0000
 -12   4   0   51291    2160                                                       51015    0.58    0.00  1.0000
  -4 -12   0   51825    2090                                                       51545    0.58    0.00  1.0000
  12  -4   0   51502    2090                                                       51225    0.58    0.00  1.0000
   4  12   0   49950    2030                                                       49675    0.58    0.00  1.0000
 -12   4   0   52013    2110                                                       51735    0.58    0.00  1.0000
  12  -4   0   52755    2030                                                       52475    0.58    0.00  1.0000
 -12   4   0   47381    2010                                                       47115    0.58    0.00  1.0000
  -4 -12   0   52096    2020                                                       51815    0.58    0.00  1.0000
 -12   4   0   51111    2070                                                       50835    0.58    0.00  1.0000
  -4 -12   0   51795    2030                                                       51515    0.58    0.00  1.0000
  -4 -12   0   50772    2010                                                       50495    0.58    0.00  1.0000
  -4 -12   0   52176    2030                                                       51895    0.58    0.00  1.0000
  -4 -12   0   45027    2070                                                       44766    0.58    0.00  1.0000
  12  -4   0   52785    2020                                                       52505    0.58    0.00  1.0000
  -4 -12   0   51324    2000                                                       51045    0.58    0.00  1.0000
   4  12   0   51705    2050                                                       51425    0.58    0.00  1.0000
 -12   4   0   50148    2050                                                       49875    0.58    0.00  1.0000
 -12   4   0   52384    2130                                                       52105    0.58    0.00  1.0000
  -4 -12   0   50832    2010                                                       50555    0.58    0.00  1.0000
  -4 -12   0   52316    2000                                                       52035    0.58    0.00  1.0000
 -12   4   0   49838    2100                                                       49565    0.58    0.00  1.0000
  12  -4   0   50539    2070                                                       50265    0.58    0.00  1.0000
  12  -4   0   54420    2120                                                       54135    0.58    0.00  1.0000
 -12   4   0   50790    2000                                                       50515    0.58    0.00  1.0000
 -12   4   0   51983    2080                                                       51705    0.58    0.00  1.0000
   4  12   0   50341    1990                                                       50065    0.58    0.00  1.0000
 -12   4   0   53267    2030                                                       52985    0.58    0.00  1.0000
  12  -4   0   51121    2110                                                       50845    0.58    0.00  1.0000
   4  12   0   51123    2120                                                       50845    0.58    0.00  1.0000
   6  12   0    1746     210                                                        1990    2.66    0.00  1.0000
  12  -6   0    1503     240                                                        1730    2.66    0.00  1.0000
   6  12   0    1345     170                                                        1560    2.66    0.00  1.0000
  -6 -12   0    1225     140                                                        1430    2.66    0.00  1.0000
 -12   6   0    1086     180                                                        1280    2.66    0.00  1.0000
  -6 -12   0    1169     140                                                        1370    2.66    0.00  1.0000
  -6 -12   0    1206     170                                                        1410    2.66    0.00  1.0000
 -12   6   0    1206     250                                                        1410    2.66    0.00  1.0000
   6  12   0    1280     200                                                        1490    2.66    0.00  1.0000
  12  -6   0    1559     260                                                        1790    2.66    0.00  1.0000
  12  -6   0    1625     290                                                        1860    2.66    0.00  1.0000
  12  -6   0    1420     200                                                        1640    2.66    0.00  1.0000
  12  -6   0    1420     250                                                        1640    2.66    0.00  1.0000
 -12   6   0    1336     260                                                        1550    2.66    0.00  1.0000
  12  -6   0    1615     210                                                        1850    2.66    0.00  1.0000
 -12   6   0    1485     300                                                        1710    2.66    0.00  1.0000
   6  12   0     948     160                                                        1130    2.66    0.00  1.0000
   6  12   0    1746     240                                                        1990    2.66    0.00  1.0000
  -6 -12   0    1475     230                                                        1700    2.66    0.00  1.0000
 -12   6   0    1132     180                                                        1330    2.66    0.00  1.0000
   6  12   0    1132     130                                                        1330    2.66    0.00  1.0000
 -12   6   0    1308     290                                                        1520    2.66    0.00  1.0000
 -12   6   0    1308     220                                                        1520    2.66    0.00  1.0000
  -6 -12   0    1793     240                                                        2040    2.66    0.00  1.0000
   6  12   0    1522     200                                                        1750    2.66    0.00  1.0000
  -6 -12   0    1373     170                                                        1590    2.66    0.00  1.0000
  -6 -12   0    1049     150                                                        1240    2.66    0.00  1.0000
  12  -6   0    1597     290                                                        1830    2.66    0.00  1.0000
  -6 -12   0    1812     180                                                        2060    2.66    0.00  1.0000
 -12   6   0    1513     260                                                        1740    2.66    0.00  1.0000
 -12   8   0   71945    2880                                                       71023   -1.62    0.00  1.0000
  12  -8   0   71492    2880                                                       70573   -1.62    0.00  1.0000
 -12   8   0   74773    2960                                                       73833   -1.62    0.00  1.0000
  -8 -12   0   75248    2790                                                       74303   -1.63    0.00  1.0000
  12  -8   0   75075    2980                                                       74133   -1.62    0.00  1.0000
  -8 -12   0   70447    2780                                                       69533   -1.63    0.00  1.0000
  12  -8   0   70868    2980                                                       69953   -1.62    0.00  1.0000
  -8 -12   0   74141    2820                                                       73203   -1.63    0.00  1.0000
  12  -8   0   74441    2840                                                       73503   -1.62    0.00  1.0000
 -12   8   0   72840    3000                                                       71913   -1.62    0.00  1.0000
  12  -8   0   73203    2940                                                       72273   -1.62    0.00  1.0000
  -8 -12   0   74553    2790                                                       73613   -1.63    0.00  1.0000
  12  -8   0   70163    2930                                                       69253   -1.62    0.00  1.0000
   8  12   0   70286    2800                                                       69373   -1.63    0.00  1.0000
 -12   8   0   76311    2960                                                       75362   -1.62    0.00  1.0000
  12  -8   0   73565    2870                                                       72633   -1.62    0.00  1.0000
  12  -8   0   76281    3000                                                       75332   -1.62    0.00  1.0000
  -8 -12   0   76394    2780                                                       75442   -1.63    0.00  1.0000
 -12   8   0   74209    3000                                                       73273   -1.62    0.00  1.0000
   8  12   0   75941    2800                                                       74992   -1.63    0.00  1.0000
   8  12   0   73064    2820                                                       72133   -1.63    0.00  1.0000
   8  12   0   73013    2830                                                       72083   -1.63    0.00  1.0000
   8  12   0   74493    2860                                                       73553   -1.63    0.00  1.0000
   8  12   0   71916    2840                                                       70993   -1.63    0.00  1.0000
  -8 -12   0   72953    2800                                                       72023   -1.63    0.00  1.0000
 -12   8   0   72096    2900                                                       71173   -1.62    0.00  1.0000
 -12   8   0   73706    2870                                                       72773   -1.62    0.00  1.0000
  -8 -12   0   76213    2880                                                       75262   -1.63    0.00  1.0000
 -12   8   0   80678    3080                                                       79702   -1.62    0.00  1.0000
 -12  10   0       0     150                                                         -60    0.55    0.00  1.0000
  10  12   0       0      80                                                         -50    0.54    0.00  1.0000
 -12  10   0      90     170                                                          80    0.55    0.00  1.0000
  12 -10   0     205     180                                                         190    0.55    0.00  1.0000
  12 -10   0       0     210                                                         -20    0.55    0.00  1.0000
  12 -10   0       0     100                                                        -160    0.55    0.00  1.0000
 -12  10   0     132     180                                                         120    0.55    0.00  1.0000
 -10 -12   0       0      90                                                         -20    0.54    0.00  1.0000
  12 -10   0       0     210                                                        -250    0.55    0.00  1.0000
 -10 -12   0       0     120                                                        -140    0.54    0.00  1.0000
 -10 -12   0      58     130                                                          50    0.54    0.00  1.0000
  10  12   0       0     100                                                         -40    0.54    0.00  1.0000
  12 -10   0      79     140                                                          70    0.55    0.00  1.0000
 -12  10   0     164     270                                                         150    0.55    0.00  1.0000
 -10 -12   0     111      70                                                         100    0.54    0.00  1.0000
  10  12   0     100     100                                                          90    0.54    0.00  1.0000
  12 -10   0       0     220                                                         -40    0.55    0.00  1.0000
  12 -10   0     101     140                                                          90    0.55    0.00  1.0000
 -12  10   0     205     190                                                         190    0.55    0.00  1.0000
  12 -10   0      58     210                                                          50    0.55    0.00  1.0000
  10  12   0      90      70                                                          80    0.54    0.00  1.0000
 -12  10   0       0     110                                                         -40    0.55    0.00  1.0000
 -10 -12   0       0      70                                                         -40    0.54    0.00  1.0000
 -10 -12   0      79      80                                                          70    0.54    0.00  1.0000
 -12  10   0       0     210                                                         -40    0.55    0.00  1.0000
  12 -12   0    3212     430                                                        3190   -0.20    0.00  1.0000
 -12  12   0    2861     340                                                        2840   -0.20    0.00  1.0000
  12 -12   0    2048     250                                                        2030   -0.20    0.00  1.0000
 -12  12   0    2399     340                                                        2380   -0.20    0.00  1.0000
 -12 -12   0    4916     320                                                        4890   -0.19    0.00  1.0000
  12 -12   0    2289     330                                                        2270   -0.20    0.00  1.0000
  12 -12   0    1746     260                                                        1730   -0.20    0.00  1.0000
 -12  12   0    2148     280                                                        2130   -0.20    0.00  1.0000
  12 -12   0    2710     380                                                        2690   -0.20    0.00  1.0000
 -12 -12   0    3121     180                                                        3100   -0.19    0.00  1.0000
 -12  12   0    2600     290                                                        2580   -0.20    0.00  1.0000
  12  12   0    3562     240                                                        3540   -0.19    0.00  1.0000
 -12 -12   0    3713     210                                                        3690   -0.19    0.00  1.0000
 -12  12   0    3423     430                                                        3400   -0.20    0.00  1.0000
  12 -12   0    3052     410                                                        3030   -0.20    0.00  1.0000
  12  12   0    3191     230                                                        3170   -0.19    0.00  1.0000
 -12 -12   0    4054     260                                                        4030   -0.19    0.00  1.0000
 -12 -12   0    3412     190                                                        3390   -0.19    0.00  1.0000
  12  12   0    2860     210                                                        2840   -0.19    0.00  1.0000
  12  12   0    3362     200                                                        3340   -0.19    0.00  1.0000
  11 -13   0    1053     330                                                        1210   -2.21    0.00  1.0000
 -13 -11   0    1165     170                                                        1330    2.21    0.00  1.0000
  11 -13   0    1334     240                                                        1510   -2.21    0.00  1.0000
 -11  13   0     738     310                                                         870   -2.21    0.00  1.0000
  13  11   0    1072     120                                                        1230    2.21    0.00  1.0000
 -11  13   0    1371     270                                                        1550   -2.21    0.00  1.0000
 -13 -11   0    1025     110                                                        1180    2.21    0.00  1.0000
  11 -13   0     811     220                                                         950   -2.21    0.00  1.0000
  11 -13   0    1127     320                                                        1290   -2.21    0.00  1.0000
  11 -13   0     646     180                                                         770   -2.21    0.00  1.0000
  11 -13   0    1390     360                                                        1570   -2.21    0.00  1.0000
  13  11   0    1100     120                                                        1260    2.21    0.00  1.0000
 -11  13   0     858     200                                                        1000   -2.21    0.00  1.0000
 -13 -11   0    1212     180                                                        1380    2.21    0.00  1.0000
 -11  13   0    1550     250                                                        1740   -2.21    0.00  1.0000
  11 -13   0    1099     270                                                        1260   -2.21    0.00  1.0000
 -13 -11   0    1193     110                                                        1360    2.21    0.00  1.0000
 -13 -11   0     979     210                                                        1130    2.21    0.00  1.0000
  13  11   0    1146     150                                                        1310    2.21    0.00  1.0000
 -13 -11   0    1109     100                                                        1270    2.21    0.00  1.0000
  13  11   0    1353     130                                                        1530    2.21    0.00  1.0000
 -11  13   0    1090     240                                                        1250   -2.21    0.00  1.0000
 -13 -11   0    1044     140                                                        1200    2.21    0.00  1.0000
  11 -13   0    1034     310                                                        1190   -2.21    0.00  1.0000
 -11  13   0     960     380                                                        1110   -2.21    0.00  1.0000
   9 -13   0    9707     710                                                       10209    2.37    0.00  1.0000
  -9  13   0    8110     620                                                        8569    2.37    0.00  1.0000
 -13  -9   0    7704     380                                                        8149   -2.35    0.00  1.0000
 -13  -9   0    9086     420                                                        9569   -2.35    0.00  1.0000
  -9  13   0    8528     520                                                        8999    2.37    0.00  1.0000
  13   9   0    7898     410                                                        8349   -2.35    0.00  1.0000
  -9  13   0    8703     550                                                        9179    2.37    0.00  1.0000
   9 -13   0    9883     650                                                       10389    2.37    0.00  1.0000
  -9  13   0    7779     730                                                        8229    2.37    0.00  1.0000
   9 -13   0    9873     560                                                       10379    2.37    0.00  1.0000
 -13  -9   0    8989     430                                                        9469   -2.35    0.00  1.0000
   9 -13   0    5200     530                                                        5569    2.37    0.00  1.0000
   9 -13   0    8888     540                                                        9369    2.37    0.00  1.0000
   9 -13   0    7828     620                                                        8279    2.37    0.00  1.0000
  -9  13   0    8616     540                                                        9089    2.37    0.00  1.0000
 -13  -9   0    8453     470                                                        8919   -2.35    0.00  1.0000
  -9  13   0    9961     680                                                       10469    2.37    0.00  1.0000
   9 -13   0    8898     650                                                        9379    2.37    0.00  1.0000
  13   9   0    8589     440                                                        9059   -2.35    0.00  1.0000
 -13  -9   0    8229     460                                                        8689   -2.35    0.00  1.0000
  13   9   0    7996     400                                                        8449   -2.35    0.00  1.0000
  -9  13   0    9044     770                                                        9529    2.37    0.00  1.0000
   9 -13   0    8888     660                                                        9369    2.37    0.00  1.0000
 -13  -7   0   10779     500                                                       11859   -4.79    0.00  1.0000
   7 -13   0   11048     640                                                       12139    4.78    0.00  1.0000
 -13  -7   0   10932     520                                                       12019   -4.79    0.00  1.0000
   7 -13   0   10972     610                                                       12059    4.78    0.00  1.0000
   7 -13   0   10162     680                                                       11209    4.78    0.00  1.0000
  -7  13   0   11229     630                                                       12329    4.78    0.00  1.0000
  13   7   0   10522     520                                                       11589   -4.79    0.00  1.0000
  -7  13   0   10915     640                                                       11999    4.78    0.00  1.0000
   7 -13   0   10276     770                                                       11329    4.78    0.00  1.0000
  -7  13   0   10305     810                                                       11359    4.78    0.00  1.0000
  -7  13   0    9581     710                                                       10599    4.78    0.00  1.0000
  13   7   0   10360     530                                                       11419   -4.79    0.00  1.0000
   7 -13   0   11296     720                                                       12399    4.78    0.00  1.0000
   7 -13   0   11430     740                                                       12539    4.78    0.00  1.0000
   7 -13   0    9981     710                                                       11019    4.78    0.00  1.0000
 -13  -7   0   10903     520                                                       11989   -4.79    0.00  1.0000
  13   7   0    9893     530                                                       10929   -4.79    0.00  1.0000
 -13  -7   0   11065     600                                                       12159   -4.79    0.00  1.0000
   7 -13   0   11124     630                                                       12219    4.78    0.00  1.0000
  -7  13   0   10724     610                                                       11799    4.78    0.00  1.0000
   7 -13   0    9838     640                                                       10869    4.78    0.00  1.0000
  -7  13   0   11134     800                                                       12229    4.78    0.00  1.0000
   7 -13   0   10905     720                                                       11989    4.78    0.00  1.0000
   5 -13   0   13230     680                                                       12039   -5.02    0.00  1.0000
 -13  -5   0   12412     470                                                       11259    5.02    0.00  1.0000
  -5  13   0   12275     600                                                       11129   -5.02    0.00  1.0000
 -13  -5   0   12811     500                                                       11639    5.02    0.00  1.0000
  13   5   0   12380     530                                                       11229    5.02    0.00  1.0000
   5 -13   0   14884     760                                                       13619   -5.02    0.00  1.0000
  13   5   0   12790     500                                                       11619    5.02    0.00  1.0000
  -5  13   0   12968     600                                                       11789   -5.02    0.00  1.0000
 -13  -5   0   12002     480                                                       10869    5.02    0.00  1.0000
   5 -13   0   12338     680                                                       11189   -5.02    0.00  1.0000
  13   5   0   12265     530                                                       11119    5.02    0.00  1.0000
   5 -13   0   13010     640                                                       11829   -5.02    0.00  1.0000
   5 -13   0   13418     720                                                       12219   -5.02    0.00  1.0000
   5 -13   0   13104     690                                                       11919   -5.02    0.00  1.0000
   5 -13   0   12642     710                                                       11479   -5.02    0.00  1.0000
  13   5   0   12653     520                                                       11489    5.02    0.00  1.0000
   5 -13   0   12768     650                                                       11599   -5.02    0.00  1.0000
  -5  13   0   12663     750                                                       11499   -5.02    0.00  1.0000
  -5  13   0   13167     700                                                       11979   -5.02    0.00  1.0000
 -13  -5   0   12391     520                                                       11239    5.02    0.00  1.0000
   5 -13   0   11844     570                                                       10719   -5.02    0.00  1.0000
 -13  -5   0   12999     590                                                       11819    5.02    0.00  1.0000
  -5  13   0   11771     750                                                       10649   -5.02    0.00  1.0000
 -13  -5   0   12874     510                                                       11699    5.02    0.00  1.0000
   3 -13   0   18777     940                                                       17638   -3.97    0.00  1.0000
  13   3   0   19022     770                                                       17878    3.97    0.00  1.0000
 -13  -3   0   19940     840                                                       18768    3.97    0.00  1.0000
   3 -13   0   19138     820                                                       17988   -3.97    0.00  1.0000
  13   3   0   17918     770                                                       16808    3.97    0.00  1.0000
  -3  13   0   18106     810                                                       16988   -3.97    0.00  1.0000
 -13  -3   0   18682     770                                                       17548    3.97    0.00  1.0000
 -13  -3   0   19363     760                                                       18208    3.97    0.00  1.0000
   3 -13   0   16536     840                                                       15468   -3.97    0.00  1.0000
   3 -13   0   18746     910                                                       17608   -3.97    0.00  1.0000
  13   3   0   18393     760                                                       17268    3.97    0.00  1.0000
 -13  -3   0   18558     710                                                       17428    3.97    0.00  1.0000
  -3  13   0   17693     950                                                       16588   -3.97    0.00  1.0000
   3 -13   0   18230     860                                                       17108   -3.97    0.00  1.0000
  -3  13   0   18643     970                                                       17508   -3.97    0.00  1.0000
  -3  13   0   17951     800                                                       16838   -3.97    0.00  1.0000
  13   3   0   19816     780                                                       18648    3.97    0.00  1.0000
 -13  -3   0   19631     740                                                       18468    3.97    0.00  1.0000
   3 -13   0   18715     870                                                       17578   -3.97    0.00  1.0000
  -3  13   0   18849     800                                                       17708   -3.97    0.00  1.0000
   3 -13   0   19437     850                                                       18278   -3.97    0.00  1.0000
   3 -13   0   18312     870                                                       17188   -3.97    0.00  1.0000
 -13  -3   0   18878     750                                                       17738    3.97    0.00  1.0000
  13   3   0   19002     730                                                       17858    3.97    0.00  1.0000
  -3  13   0   18292     890                                                       17168   -3.97    0.00  1.0000
  13   3   0   18785     720                                                       17648    3.97    0.00  1.0000
   3 -13   0   18385     920                                                       17258   -3.97    0.00  1.0000
 -13  -3   0   19105     720                                                       17958    3.97    0.00  1.0000
   3 -13   0   21065     840                                                       19858   -3.97    0.00  1.0000
   3 -13   0   19179     800                                                       18028   -3.97    0.00  1.0000
   1 -13   0    7271     510                                                        8979    8.96    0.00  1.0000
  13   1   0    8292     480                                                       10109   -8.96    0.00  1.0000
  -1  13   0    6553     470                                                        8179    8.96    0.00  1.0000
   1 -13   0    7352     500                                                        9069    8.96    0.00  1.0000
  -1  13   0    7595     560                                                        9339    8.96    0.00  1.0000
   1 -13   0    7451     520                                                        9179    8.96    0.00  1.0000
   1 -13   0    7631     540                                                        9379    8.96    0.00  1.0000
  -1  13   0    6634     570                                                        8269    8.96    0.00  1.0000
  -1  13   0    7857     490                                                        9629    8.96    0.00  1.0000
  13   1   0    7632     450                                                        9379   -8.96    0.00  1.0000
  -1  13   0    7658     460                                                        9409    8.96    0.00  1.0000
   1 -13   0    7758     600                                                        9519    8.96    0.00  1.0000
   1 -13   0    7884     490                                                        9659    8.96    0.00  1.0000
 -13  -1   0    8491     540                                                       10329   -8.96    0.00  1.0000
   1 -13   0    7424     530                                                        9149    8.96    0.00  1.0000
 -13  -1   0    7551     470                                                        9289   -8.96    0.00  1.0000
   1 -13   0    7550     600                                                        9289    8.96    0.00  1.0000
 -13  -1   0    7749     440                                                        9509   -8.96    0.00  1.0000
 -13  -1   0    7101     420                                                        8789   -8.96    0.00  1.0000
   1 -13   0    8092     540                                                        9889    8.96    0.00  1.0000
   1 -13   0    7244     490                                                        8949    8.96    0.00  1.0000
 -13  -1   0    7749     510                                                        9509   -8.96    0.00  1.0000
  -1  13   0    8808     650                                                       10679    8.96    0.00  1.0000
  13   1   0    7029     470                                                        8709   -8.96    0.00  1.0000
  13   1   0    6894     470                                                        8559   -8.96    0.00  1.0000
  -1  13   0    7722     620                                                        9479    8.96    0.00  1.0000
  13   1   0    7479     470                                                        9209   -8.96    0.00  1.0000
   1 -13   0    6768     570                                                        8419    8.96    0.00  1.0000
 -13  -1   0    7704     480                                                        9459   -8.96    0.00  1.0000
  13   1   0    8555     510                                                       10399   -8.96    0.00  1.0000
 -13  -1   0    7182     450                                                        8879   -8.96    0.00  1.0000
 -13  -1   0    7011     490                                                        8689   -8.96    0.00  1.0000
  13   1   0    7425     490                                                        9149   -8.96    0.00  1.0000
 -13  -1   0    8210     560                                                       10019   -8.96    0.00  1.0000
  13  -1   0    7874     540                                                        9649    8.97    0.00  1.0000
  -1 -13   0    8645     530                                                       10499   -8.96    0.00  1.0000
   1  13   0    7713     460                                                        9469   -8.96    0.00  1.0000
  13  -1   0    6758     500                                                        8409    8.97    0.00  1.0000
  13  -1   0    7829     480                                                        9599    8.97    0.00  1.0000
  -1 -13   0    6741     570                                                        8389   -8.96    0.00  1.0000
  -1 -13   0    6786     570                                                        8439   -8.96    0.00  1.0000
  -1 -13   0    7731     530                                                        9489   -8.96    0.00  1.0000
  -1 -13   0    7118     500                                                        8809   -8.96    0.00  1.0000
  -1 -13   0    7550     540                                                        9289   -8.96    0.00  1.0000
  -1 -13   0    7397     500                                                        9119   -8.96    0.00  1.0000
 -13   1   0    7829     490                                                        9599    8.97    0.00  1.0000
  13  -1   0    7793     500                                                        9559    8.97    0.00  1.0000
  -1 -13   0    6714     460                                                        8359   -8.96    0.00  1.0000
 -13   1   0    6964     440                                                        8639    8.97    0.00  1.0000
  13  -1   0    7468     500                                                        9199    8.97    0.00  1.0000
 -13   1   0    8118     590                                                        9919    8.97    0.00  1.0000
  13  -1   0    8091     500                                                        9889    8.97    0.00  1.0000
  -1 -13   0    7875     500                                                        9649   -8.96    0.00  1.0000
 -13   1   0    7531     580                                                        9269    8.97    0.00  1.0000
 -13   1   0    7576     480                                                        9319    8.97    0.00  1.0000
 -13   1   0    6821     520                                                        8479    8.97    0.00  1.0000
   1  13   0    7037     560                                                        8719   -8.96    0.00  1.0000
   1  13   0    7145     460                                                        8839   -8.96    0.00  1.0000
  -1 -13   0    7415     470                                                        9139   -8.96    0.00  1.0000
 -13   1   0    7486     450                                                        9219    8.97    0.00  1.0000
  13  -1   0    7045     520                                                        8729    8.97    0.00  1.0000
  -1 -13   0    7370     480                                                        9089   -8.96    0.00  1.0000
 -13   1   0    7342     560                                                        9059    8.97    0.00  1.0000
  13  -1   0    7775     530                                                        9539    8.97    0.00  1.0000
 -13   1   0    7738     540                                                        9499    8.97    0.00  1.0000
  -1 -13   0    7767     450                                                        9529   -8.96    0.00  1.0000
   1  13   0    7316     590                                                        9029   -8.96    0.00  1.0000
  13  -1   0    6275     520                                                        7869    8.97    0.00  1.0000
 -13   3   0   19209     940                                                       18058   -3.97    0.00  1.0000
 -13   3   0   18786     820                                                       17648   -3.97    0.00  1.0000
  13  -3   0   18961     870                                                       17818   -3.97    0.00  1.0000
  -3 -13   0   20045     820                                                       18868    3.97    0.00  1.0000
 -13   3   0   18291     860                                                       17168   -3.97    0.00  1.0000
   3  13   0   19137     770                                                       17988    3.97    0.00  1.0000
  -3 -13   0   17765     810                                                       16658    3.97    0.00  1.0000
  13  -3   0   18776     850                                                       17638   -3.97    0.00  1.0000
  -3 -13   0   19828     800                                                       18658    3.97    0.00  1.0000
  13  -3   0   19683     830                                                       18518   -3.97    0.00  1.0000
  -3 -13   0   18333     740                                                       17208    3.97    0.00  1.0000
  -3 -13   0   18941     890                                                       17798    3.97    0.00  1.0000
  13  -3   0   19570     880                                                       18408   -3.97    0.00  1.0000
  -3 -13   0   18880     780                                                       17738    3.97    0.00  1.0000
  13  -3   0   18156     780                                                       17038   -3.97    0.00  1.0000
  13  -3   0   18115     830                                                       16998   -3.97    0.00  1.0000
  -3 -13   0   20024     800                                                       18848    3.97    0.00  1.0000
   3  13   0   18694     860                                                       17558    3.97    0.00  1.0000
 -13   3   0   18105     790                                                       16988   -3.97    0.00  1.0000
 -13   3   0   19333     830                                                       18178   -3.97    0.00  1.0000
  -3 -13   0   20478     900                                                       19288    3.97    0.00  1.0000
  -3 -13   0   19302     830                                                       18148    3.97    0.00  1.0000
 -13   3   0   19889     920                                                       18718   -3.97    0.00  1.0000
  13  -3   0   19663     780                                                       18498   -3.97    0.00  1.0000
   3  13   0   18291     760                                                       17168    3.97    0.00  1.0000
  -3 -13   0   18653     720                                                       17518    3.97    0.00  1.0000
  -3 -13   0   19818     800                                                       18648    3.97    0.00  1.0000
 -13   3   0   17981     880                                                       16868   -3.97    0.00  1.0000
 -13   3   0   18961     750                                                       17818   -3.97    0.00  1.0000
 -13   3   0   19250     830                                                       18098   -3.97    0.00  1.0000
 -13   3   0   19085     780                                                       17938   -3.97    0.00  1.0000
   3  13   0   18756     880                                                       17618    3.97    0.00  1.0000
  -3 -13   0   17796     800                                                       16688    3.97    0.00  1.0000
  13  -5   0   13128     580                                                       11939   -5.03    0.00  1.0000
  -5 -13   0   12779     570                                                       11609    5.02    0.00  1.0000
   5  13   0   11939     660                                                       10809    5.02    0.00  1.0000
   5  13   0   12800     620                                                       11629    5.02    0.00  1.0000
 -13   5   0   13883     690                                                       12659   -5.03    0.00  1.0000
 -13   5   0   13160     590                                                       11969   -5.03    0.00  1.0000
  13  -5   0   12729     680                                                       11559   -5.03    0.00  1.0000
 -13   5   0   12782     640                                                       11609   -5.03    0.00  1.0000
  -5 -13   0   13607     580                                                       12399    5.02    0.00  1.0000
  -5 -13   0   13094     550                                                       11909    5.02    0.00  1.0000
 -13   5   0   12373     680                                                       11219   -5.03    0.00  1.0000
 -13   5   0   14835     600                                                       13569   -5.03    0.00  1.0000
  13  -5   0   12425     640                                                       11269   -5.03    0.00  1.0000
  13  -5   0   13097     570                                                       11909   -5.03    0.00  1.0000
   5  13   0   11371     610                                                       10269    5.02    0.00  1.0000
 -13   5   0   12971     710                                                       11789   -5.03    0.00  1.0000
  -5 -13   0   13073     560                                                       11889    5.02    0.00  1.0000
  -5 -13   0   13953     550                                                       12729    5.02    0.00  1.0000
  13  -5   0   13076     670                                                       11889   -5.03    0.00  1.0000
  -5 -13   0   13419     550                                                       12219    5.02    0.00  1.0000
  -5 -13   0   12548     640                                                       11389    5.02    0.00  1.0000
   5  13   0   12706     580                                                       11539    5.02    0.00  1.0000
  13  -5   0   12404     670                                                       11249   -5.03    0.00  1.0000
 -13   5   0   12383     630                                                       11229   -5.03    0.00  1.0000
   5  13   0   12485     520                                                       11329    5.02    0.00  1.0000
  -5 -13   0   12401     570                                                       11249    5.02    0.00  1.0000
   5  13   0   13429     610                                                       12229    5.02    0.00  1.0000
  13  -5   0   12152     620                                                       11009   -5.03    0.00  1.0000
 -13   5   0   13327     760                                                       12129   -5.03    0.00  1.0000
  -5 -13   0   12527     570                                                       11369    5.02    0.00  1.0000
 -13   5   0   13380     630                                                       12179   -5.03    0.00  1.0000
  -5 -13   0   12958     650                                                       11779    5.02    0.00  1.0000
  13  -7   0   11467     680                                                       12579    4.79    0.00  1.0000
  13  -7   0   11897     620                                                       13029    4.79    0.00  1.0000
   7  13   0   11019     590                                                       12109   -4.79    0.00  1.0000
   7  13   0   10724     590                                                       11799   -4.79    0.00  1.0000
  -7 -13   0   10809     570                                                       11889   -4.79    0.00  1.0000
   7  13   0   11477     650                                                       12589   -4.79    0.00  1.0000
  -7 -13   0   11621     520                                                       12739   -4.79    0.00  1.0000
   7  13   0   10829     610                                                       11909   -4.79    0.00  1.0000
  13  -7   0   12834     690                                                       14009    4.79    0.00  1.0000
  13  -7   0   11448     740                                                       12559    4.79    0.00  1.0000
  -7 -13   0   10857     650                                                       11939   -4.79    0.00  1.0000
  -7 -13   0   10829     570                                                       11909   -4.79    0.00  1.0000
  -7 -13   0   11468     550                                                       12579   -4.79    0.00  1.0000
 -13   7   0   11295     760                                                       12399    4.79    0.00  1.0000
 -13   7   0   10933     630                                                       12019    4.79    0.00  1.0000
  13  -7   0   10828     720                                                       11909    4.79    0.00  1.0000
  -7 -13   0   10886     560                                                       11969   -4.79    0.00  1.0000
 -13   7   0   11009     680                                                       12099    4.79    0.00  1.0000
 -13   7   0   10123     610                                                       11169    4.79    0.00  1.0000
  13  -7   0   10485     730                                                       11549    4.79    0.00  1.0000
 -13   7   0   11763     820                                                       12889    4.79    0.00  1.0000
   7  13   0   11802     580                                                       12929   -4.79    0.00  1.0000
 -13   7   0   10685     650                                                       11759    4.79    0.00  1.0000
  -7 -13   0   11382     580                                                       12489   -4.79    0.00  1.0000
 -13   7   0   11782     720                                                       12909    4.79    0.00  1.0000
 -13   7   0   10523     730                                                       11589    4.79    0.00  1.0000
  -7 -13   0   10523     500                                                       11589   -4.79    0.00  1.0000
  -7 -13   0   11181     550                                                       12279   -4.79    0.00  1.0000
  -7 -13   0   11487     660                                                       12599   -4.79    0.00  1.0000
  13  -7   0   11219     620                                                       12319    4.79    0.00  1.0000
   9  13   0    8509     390                                                        8979   -2.37    0.00  1.0000
  -9 -13   0    7906     390                                                        8359   -2.37    0.00  1.0000
 -13   9   0    7450     540                                                        7889    2.36    0.00  1.0000
 -13   9   0    8568     610                                                        9039    2.36    0.00  1.0000
  13  -9   0    8666     610                                                        9139    2.36    0.00  1.0000
  -9 -13   0    8003     450                                                        8459   -2.37    0.00  1.0000
  13  -9   0    8510     520                                                        8979    2.36    0.00  1.0000
  -9 -13   0    8966     410                                                        9449   -2.37    0.00  1.0000
 -13   9   0    7100     680                                                        7529    2.36    0.00  1.0000
  -9 -13   0    8742     380                                                        9219   -2.37    0.00  1.0000
   9  13   0    8051     450                                                        8509   -2.37    0.00  1.0000
  -9 -13   0    8129     410                                                        8589   -2.37    0.00  1.0000
 -13   9   0    9328     670                                                        9819    2.36    0.00  1.0000
   9  13   0    8411     410                                                        8879   -2.37    0.00  1.0000
 -13   9   0    8880     540                                                        9359    2.36    0.00  1.0000
 -13   9   0    8744     680                                                        9219    2.36    0.00  1.0000
 -13   9   0    7391     560                                                        7829    2.36    0.00  1.0000
   9  13   0    8908     490                                                        9389   -2.37    0.00  1.0000
  -9 -13   0    7983     430                                                        8439   -2.37    0.00  1.0000
 -13   9   0    7994     510                                                        8449    2.36    0.00  1.0000
  13  -9   0    8442     630                                                        8909    2.36    0.00  1.0000
  -9 -13   0    7507     510                                                        7949   -2.37    0.00  1.0000
  13  -9   0    6227     600                                                        6629    2.36    0.00  1.0000
  13  -9   0    8023     500                                                        8479    2.36    0.00  1.0000
   9  13   0    8859     430                                                        9339   -2.37    0.00  1.0000
  13  -9   0    9767     660                                                       10269    2.36    0.00  1.0000
  13  -9   0    7936     570                                                        8389    2.36    0.00  1.0000
 -13  11   0    1128     280                                                        1290   -2.20    0.00  1.0000
  11  13   0    1006     170                                                        1160    2.21    0.00  1.0000
  11  13   0    1043     130                                                        1200    2.21    0.00  1.0000
 -13  11   0     933     380                                                        1080   -2.20    0.00  1.0000
 -13  11   0    1260     250                                                        1430   -2.20    0.00  1.0000
  13 -11   0    1335     290                                                        1510   -2.20    0.00  1.0000
 -11 -13   0     728     150                                                         860    2.21    0.00  1.0000
  13 -11   0    1467     340                                                        1650   -2.20    0.00  1.0000
  13 -11   0    1119     330                                                        1280   -2.20    0.00  1.0000
  13 -11   0    1072     220                                                        1230   -2.20    0.00  1.0000
 -11 -13   0    1081     200                                                        1240    2.21    0.00  1.0000
  13 -11   0    1110     320                                                        1270   -2.20    0.00  1.0000
  11  13   0    1184     160                                                        1350    2.21    0.00  1.0000
 -11 -13   0    1006     130                                                        1160    2.21    0.00  1.0000
 -13  11   0     988     220                                                        1140   -2.20    0.00  1.0000
 -13  11   0     784     280                                                         920   -2.20    0.00  1.0000
 -13  11   0    1157     240                                                        1320   -2.20    0.00  1.0000
  13 -11   0    1288     220                                                        1460   -2.20    0.00  1.0000
 -11 -13   0    1034     120                                                        1190    2.21    0.00  1.0000
 -13  11   0     877     340                                                        1020   -2.20    0.00  1.0000
 -11 -13   0    1015     140                                                        1170    2.21    0.00  1.0000
  13 -11   0     483     230                                                         590   -2.20    0.00  1.0000
 -11 -13   0    1025     210                                                        1180    2.21    0.00  1.0000
 -13 -13   0   14657     690                                                       15178    2.01    0.00  1.0000
  13  13   0   12969     640                                                       13459    2.01    0.00  1.0000
 -13  13   0   13892     910                                                       14399   -2.02    0.00  1.0000
 -13 -13   0   13126     630                                                       13619    2.01    0.00  1.0000
  13  13   0   13136     610                                                       13629    2.01    0.00  1.0000
 -13 -13   0   13489     600                                                       13989    2.01    0.00  1.0000
  13 -13   0   14578     930                                                       15098   -2.02    0.00  1.0000
  13 -13   0   14265     910                                                       14779   -2.02    0.00  1.0000
 -13  13   0   13086     760                                                       13579   -2.02    0.00  1.0000
 -13 -13   0   12704     580                                                       13189    2.01    0.00  1.0000
 -13  13   0   11438     720                                                       11899   -2.02    0.00  1.0000
 -13 -13   0   14314     730                                                       14829    2.01    0.00  1.0000
 -13 -13   0   14373     670                                                       14889    2.01    0.00  1.0000
  13 -13   0   14304     900                                                       14819   -2.02    0.00  1.0000
  13 -13   0   12841     750                                                       13329   -2.02    0.00  1.0000
 -13  13   0   15473    1020                                                       16008   -2.02    0.00  1.0000
  13  13   0   13754     590                                                       14259    2.01    0.00  1.0000
  13 -13   0   13479     820                                                       13979   -2.02    0.00  1.0000
  13 -13   0   14186     870                                                       14699   -2.02    0.00  1.0000
 -13 -13   0   13784     590                                                       14289    2.01    0.00  1.0000
 -13  13   0   13430     800                                                       13929   -2.02    0.00  1.0000
  13  13   0   12900     610                                                       13389    2.01    0.00  1.0000
 -14 -12   0    1014     110                                                        1000    0.21    0.00  1.0000
  12 -14   0     852     340                                                         840    0.20    0.00  1.0000
 -12  14   0    1275     270                                                        1260    0.20    0.00  1.0000
 -12  14   0     963     240                                                         950    0.20    0.00  1.0000
  12 -14   0     550     250                                                         540    0.20    0.00  1.0000
 -14 -12   0    1084     180                                                        1070    0.21    0.00  1.0000
  12 -14   0     449     320                                                         440    0.20    0.00  1.0000
  14  12   0     974     120                                                         960    0.21    0.00  1.0000
 -14 -12   0    1024     110                                                        1010    0.21    0.00  1.0000
 -14 -12   0     933     100                                                         920    0.21    0.00  1.0000
  14  12   0    1165     140                                                        1150    0.21    0.00  1.0000
  12 -14   0     913     200                                                         900    0.20    0.00  1.0000
  12 -14   0     822     320                                                         810    0.20    0.00  1.0000
 -12  14   0     993     410                                                         980    0.20    0.00  1.0000
 -12  14   0     883     340                                                         870    0.20    0.00  1.0000
  14  12   0     994     120                                                         980    0.21    0.00  1.0000
 -12  14   0     893     230                                                         880    0.20    0.00  1.0000
  14  12   0    1175     120                                                        1160    0.21    0.00  1.0000
 -14 -12   0     953     160                                                         940    0.21    0.00  1.0000
  12 -14   0     701     210                                                         690    0.20    0.00  1.0000
 -14 -12   0     742     200                                                         730    0.21    0.00  1.0000
 -14 -12   0     843     140                                                         830    0.21    0.00  1.0000
  12 -14   0     681     320                                                         670    0.20    0.00  1.0000
 -12  14   0    1074     210                                                        1060    0.20    0.00  1.0000
 -14 -10   0   33196    1250                                                       31407    4.70    0.00  1.0000
  10 -14   0   35798    1470                                                       33937    4.70    0.00  1.0000
 -10  14   0   32787    1360                                                       31007    4.70    0.00  1.0000
 -14 -10   0   31180    1190                                                       29447    4.70    0.00  1.0000
 -14 -10   0   34203    1200                                                       32387    4.70    0.00  1.0000
  10 -14   0   31923    1510                                                       30167    4.70    0.00  1.0000
 -10  14   0   31615    1400                                                       29867    4.70    0.00  1.0000
 -14 -10   0   33545    1240                                                       31747    4.70    0.00  1.0000
 -14 -10   0   32815    1210                                                       31037    4.70    0.00  1.0000
 -10  14   0   31635    1520                                                       29887    4.70    0.00  1.0000
  10 -14   0   32253    1380                                                       30487    4.70    0.00  1.0000
  10 -14   0   33188    1460                                                       31397    4.70    0.00  1.0000
 -14 -10   0   33453    1290                                                       31657    4.70    0.00  1.0000
 -14 -10   0   32569    1280                                                       30797    4.70    0.00  1.0000
  14  10   0   32743    1240                                                       30967    4.70    0.00  1.0000
  14  10   0   31962    1200                                                       30207    4.70    0.00  1.0000
 -10  14   0   32705    1380                                                       30927    4.70    0.00  1.0000
  10 -14   0   32633    1370                                                       30857    4.70    0.00  1.0000
  14  10   0   32548    1220                                                       30777    4.70    0.00  1.0000
  14  10   0   33720    1200                                                       31917    4.70    0.00  1.0000
 -10  14   0   33435    1610                                                       31637    4.70    0.00  1.0000
  10 -14   0   35583    1510                                                       33727    4.70    0.00  1.0000
 -10  14   0   33558    1380                                                       31757    4.70    0.00  1.0000
  10 -14   0   33003    1520                                                       31217    4.70    0.00  1.0000
 -14  -8   0       0     160                                                         -10    0.11    0.00  1.0000
  14   8   0     112     110                                                         110    0.11    0.00  1.0000
  14   8   0     112      60                                                         110    0.11    0.00  1.0000
   8 -14   0     565     220                                                         560    0.10    0.00  1.0000
  -8  14   0     524     260                                                         520    0.10    0.00  1.0000
  -8  14   0    1066     340                                                        1060    0.10    0.00  1.0000
   8 -14   0     695     290                                                         690    0.10    0.00  1.0000
   8 -14   0     464     230                                                         460    0.10    0.00  1.0000
  14   8   0     324     120                                                         320    0.11    0.00  1.0000
   8 -14   0     796     200                                                         790    0.10    0.00  1.0000
   8 -14   0     424     200                                                         420    0.10    0.00  1.0000
  -8  14   0     504     180                                                         500    0.10    0.00  1.0000
 -14  -8   0       0     100                                                         -10    0.11    0.00  1.0000
  14   8   0     223     100                                                         220    0.11    0.00  1.0000
  -8  14   0     404     160                                                         400    0.10    0.00  1.0000
   8 -14   0     535     180                                                         530    0.10    0.00  1.0000
 -14  -8   0     163     110                                                         160    0.11    0.00  1.0000
 -14  -8   0      82      80                                                          80    0.11    0.00  1.0000
   8 -14   0     685     180                                                         680    0.10    0.00  1.0000
   6 -14   0      20     150                                                         110   -5.69    0.00  1.0000
 -14  -6   0       8      70                                                          10   -5.69    0.00  1.0000
   6 -14   0      37     110                                                        -170   -5.69    0.00  1.0000
  -6  14   0      44     150                                                         160   -5.69    0.00  1.0000
   6 -14   0       6     200                                                          70   -5.69    0.00  1.0000
   6 -14   0       6     200                                                          70   -5.69    0.00  1.0000
  14   6   0      24     120                                                         120   -5.69    0.00  1.0000
  14   6   0     134     110                                                         310   -5.69    0.00  1.0000
   6 -14   0      37     230                                                         -30   -5.69    0.00  1.0000
  -6  14   0      37     250                                                         -90   -5.69    0.00  1.0000
  -6  14   0       3     140                                                          60   -5.69    0.00  1.0000
 -14  -6   0      12      90                                                          90   -5.69    0.00  1.0000
 -14  -6   0      66      90                                                         200   -5.69    0.00  1.0000
  -6  14   0      39     140                                                         150   -5.69    0.00  1.0000
 -14  -6   0      77      90                                                         220   -5.69    0.00  1.0000
 -14  -6   0      24      60                                                         120   -5.69    0.00  1.0000
  14   6   0      20      90                                                         110   -5.69    0.00  1.0000
   6 -14   0      37     190                                                        -170   -5.69    0.00  1.0000
  -6  14   0     252     250                                                         480   -5.69    0.00  1.0000
   6 -14   0     147     200                                                         330   -5.69    0.00  1.0000
   6 -14   0      39     180                                                         150   -5.69    0.00  1.0000
 -14  -6   0      37     140                                                        -140   -5.69    0.00  1.0000
  14   6   0      34      80                                                         140   -5.69    0.00  1.0000
   4 -14   0     826     280                                                         890   -1.04    0.00  1.0000
   4 -14   0     691     250                                                         750   -1.04    0.00  1.0000
   4 -14   0     864     190                                                         930   -1.04    0.00  1.0000
   4 -14   0     338     240                                                         380   -1.04    0.00  1.0000
 -14  -4   0     845     120                                                         910   -1.04    0.00  1.0000
   4 -14   0     729     210                                                         790   -1.04    0.00  1.0000
   4 -14   0     961     240                                                        1030   -1.04    0.00  1.0000
   4 -14   0     528     170                                                         580   -1.04    0.00  1.0000
  14   4   0     681     140                                                         740   -1.04    0.00  1.0000
 -14  -4   0    1319     230                                                        1400   -1.04    0.00  1.0000
  14   4   0     825     140                                                         890   -1.04    0.00  1.0000
  -4  14   0     912     190                                                         980   -1.04    0.00  1.0000
   4 -14   0    1038     190                                                        1110   -1.04    0.00  1.0000
 -14  -4   0     835     140                                                         900   -1.04    0.00  1.0000
  -4  14   0     566     300                                                         620   -1.04    0.00  1.0000
   4 -14   0     854     220                                                         920   -1.04    0.00  1.0000
 -14  -4   0     777     140                                                         840   -1.04    0.00  1.0000
   4 -14   0     538     230                                                         590   -1.04    0.00  1.0000
  -4  14   0     854     180                                                         920   -1.04    0.00  1.0000
   4 -14   0     845     240                                                         910   -1.04    0.00  1.0000
  14   4   0     797     160                                                         860   -1.04    0.00  1.0000
 -14  -4   0     970     150                                                        1040   -1.04    0.00  1.0000
  -4  14   0    1077     260                                                        1150   -1.04    0.00  1.0000
 -14  -4   0     922     110                                                         990   -1.04    0.00  1.0000
  14   4   0     903     160                                                         970   -1.04    0.00  1.0000
  -4  14   0     653     160                                                         710   -1.04    0.00  1.0000
   2 -14   0   71151    3030                                                       74853    6.46    0.00  1.0000
   2 -14   0   74202    3080                                                       77982    6.46    0.00  1.0000
  14   2   0   73932    2970                                                       77702    6.45    0.00  1.0000
   2 -14   0   72515    3100                                                       76252    6.46    0.00  1.0000
   2 -14   0   74202    3010                                                       77982    6.46    0.00  1.0000
 -14  -2   0   71251    2960                                                       74953    6.45    0.00  1.0000
   2 -14   0   70585    3020                                                       74273    6.46    0.00  1.0000
  14   2   0   70227    2970                                                       73903    6.45    0.00  1.0000
 -14  -2   0   72313    3020                                                       76042    6.45    0.00  1.0000
   2 -14   0   74329    3030                                                       78112    6.46    0.00  1.0000
  -2  14   0   71384    3060                                                       75092    6.46    0.00  1.0000
   2 -14   0   71666    3120                                                       75382    6.46    0.00  1.0000
  -2  14   0   72681    2990                                                       76422    6.46    0.00  1.0000
 -14  -2   0   74156    2950                                                       77932    6.45    0.00  1.0000
   2 -14   0   71783    3050                                                       75502    6.46    0.00  1.0000
  -2  14   0   70624    2980                                                       74313    6.46    0.00  1.0000
  14   2   0   70890    2930                                                       74583    6.45    0.00  1.0000
 -14  -2   0   72371    2920                                                       76102    6.45    0.00  1.0000
 -14  -2   0   71212    2910                                                       74913    6.45    0.00  1.0000
 -14  -2   0   72742    2920                                                       76482    6.45    0.00  1.0000
   2 -14   0   73539    3050                                                       77302    6.46    0.00  1.0000
 -14  -2   0   73025    3030                                                       76772    6.45    0.00  1.0000
  -2  14   0   71209    3140                                                       74913    6.46    0.00  1.0000
  -2  14   0   72729    2960                                                       76472    6.46    0.00  1.0000
   2 -14   0   71481    2970                                                       75192    6.46    0.00  1.0000
  14   2   0   72245    2940                                                       75972    6.45    0.00  1.0000
   2 -14   0   73812    2990                                                       77582    6.46    0.00  1.0000
 -14  -2   0   70305    2970                                                       73983    6.45    0.00  1.0000
  14   2   0   72157    2960                                                       75882    6.45    0.00  1.0000
  14   2   0   70569    2950                                                       74253    6.45    0.00  1.0000
 -14   0   0   14937     690                                                       13539   -5.52    0.00  1.0000
   0  14   0   14716     710                                                       13329   -5.52    0.00  1.0000
   0  14   0   14684     630                                                       13299   -5.52    0.00  1.0000
   0 -14   0   14916     670                                                       13519   -5.52    0.00  1.0000
 -14   0   0   14895     670                                                       13499   -5.52    0.00  1.0000
 -14   0   0   15902     700                                                       14459   -5.52    0.00  1.0000
  14   0   0   12062     650                                                       10809   -5.52    0.00  1.0000
   0  14   0   15850     760                                                       14409   -5.52    0.00  1.0000
   0 -14   0   13938     750                                                       12589   -5.52    0.00  1.0000
   0 -14   0   14338     710                                                       12969   -5.52    0.00  1.0000
  14   0   0   14149     650                                                       12789   -5.52    0.00  1.0000
 -14   0   0   15902     610                                                       14459   -5.52    0.00  1.0000
   0 -14   0   15367     660                                                       13949   -5.52    0.00  1.0000
   0 -14   0   15671     640                                                       14239   -5.52    0.00  1.0000
   0 -14   0   13327     670                                                       12009   -5.52    0.00  1.0000
   0  14   0   14138     780                                                       12779   -5.52    0.00  1.0000
   0 -14   0   13801     650                                                       12459   -5.52    0.00  1.0000
   0 -14   0   15462     690                                                       14039   -5.52    0.00  1.0000
  14   0   0   14338     620                                                       12969   -5.52    0.00  1.0000
 -14   0   0   14664     640                                                       13279   -5.52    0.00  1.0000
   0 -14   0   15063     700                                                       13659   -5.52    0.00  1.0000
   0 -14   0   14684     700                                                       13299   -5.52    0.00  1.0000
 -14   0   0   14506     590                                                       13129   -5.52    0.00  1.0000
  14   0   0   14527     640                                                       13149   -5.52    0.00  1.0000
 -14   0   0   14390     620                                                       13019   -5.52    0.00  1.0000
   0  14   0   14905     630                                                       13509   -5.52    0.00  1.0000
 -14   0   0   15441     710                                                       14019   -5.52    0.00  1.0000
   0 -14   0   14748     750                                                       13359   -5.52    0.00  1.0000
 -14   0   0   15441     740                                                       14019   -5.52    0.00  1.0000
  14   0   0   14695     670                                                       13309   -5.52    0.00  1.0000
  14   0   0   13096     630                                                       11789   -5.52    0.00  1.0000
  14  -2   0   73232    3030                                                       76992    6.46    0.00  1.0000
 -14   2   0   70620    2990                                                       74313    6.46    0.00  1.0000
 -14   2   0   73788    3100                                                       77562    6.46    0.00  1.0000
  -2 -14   0   72902    3010                                                       76652    6.46    0.00  1.0000
  -2 -14   0   72219    2920                                                       75952    6.46    0.00  1.0000
   2  14   0   72814    2960                                                       76562    6.46    0.00  1.0000
 -14   2   0   74227    2990                                                       78012    6.46    0.00  1.0000
  -2 -14   0   70631    3060                                                       74323    6.46    0.00  1.0000
  -2 -14   0   71332    3000                                                       75042    6.46    0.00  1.0000
  14  -2   0   78628    3050                                                       82522    6.46    0.00  1.0000
  -2 -14   0   72121    2980                                                       75852    6.46    0.00  1.0000
  -2 -14   0   74092    3030                                                       77872    6.46    0.00  1.0000
  14  -2   0   72530    2990                                                       76272    6.46    0.00  1.0000
 -14   2   0   73427    2890                                                       77192    6.46    0.00  1.0000
  -2 -14   0   73526    2990                                                       77292    6.46    0.00  1.0000
  14  -2   0   69918    3000                                                       73593    6.46    0.00  1.0000
  -2 -14   0   73916    3090                                                       77692    6.46    0.00  1.0000
   2  14   0   69958    3060                                                       73633    6.46    0.00  1.0000
   2  14   0   70777    3080                                                       74473    6.46    0.00  1.0000
 -14   2   0   73398    3050                                                       77162    6.46    0.00  1.0000
 -14   2   0   73584    2960                                                       77352    6.46    0.00  1.0000
  -2 -14   0   71585    2960                                                       75302    6.46    0.00  1.0000
  -2 -14   0   70153    2990                                                       73833    6.46    0.00  1.0000
 -14   2   0   72238    3070                                                       75972    6.46    0.00  1.0000
  14  -2   0   71916    3010                                                       75642    6.46    0.00  1.0000
 -14   2   0   69987    3030                                                       73663    6.46    0.00  1.0000
   2  14   0   72502    2950                                                       76242    6.46    0.00  1.0000
 -14   2   0   70572    2950                                                       74263    6.46    0.00  1.0000
  -2 -14   0   70221    2990                                                       73903    6.46    0.00  1.0000
  -2 -14   0   71196    2940                                                       74903    6.46    0.00  1.0000
 -14   4   0     990     180                                                        1060   -1.03    0.00  1.0000
 -14   4   0    1125     220                                                        1200   -1.03    0.00  1.0000
  -4 -14   0     960     180                                                        1030   -1.04    0.00  1.0000
 -14   4   0     768     220                                                         830   -1.03    0.00  1.0000
  14  -4   0     855     220                                                         920   -1.03    0.00  1.0000
   4  14   0     767     200                                                         830   -1.04    0.00  1.0000
  -4 -14   0     671     180                                                         730   -1.04    0.00  1.0000
  -4 -14   0     623     150                                                         680   -1.04    0.00  1.0000
 -14   4   0     778     190                                                         840   -1.03    0.00  1.0000
  -4 -14   0     796     160                                                         860   -1.04    0.00  1.0000
 -14   4   0     759     160                                                         820   -1.03    0.00  1.0000
 -14   4   0     768     260                                                         830   -1.03    0.00  1.0000
   4  14   0     700     130                                                         760   -1.04    0.00  1.0000
 -14   4   0     913     230                                                         980   -1.03    0.00  1.0000
  -4 -14   0     806     200                                                         870   -1.04    0.00  1.0000
 -14   4   0    1067     300                                                        1140   -1.03    0.00  1.0000
 -14   4   0     913     210                                                         980   -1.03    0.00  1.0000
  -4 -14   0     854      80                                                         920   -1.04    0.00  1.0000
 -14   4   0     865     140                                                         930   -1.03    0.00  1.0000
  -4 -14   0     681     220                                                         740   -1.04    0.00  1.0000
  -4 -14   0     854     220                                                         920   -1.04    0.00  1.0000
  14  -4   0    1048     250                                                        1120   -1.03    0.00  1.0000
  -4 -14   0     729     140                                                         790   -1.04    0.00  1.0000
   4  14   0     815     220                                                         880   -1.04    0.00  1.0000
  14  -4   0    1058     240                                                        1130   -1.03    0.00  1.0000
  -4 -14   0    1211     180                                                        1290   -1.04    0.00  1.0000
  14  -4   0     826     190                                                         890   -1.03    0.00  1.0000
  14  -4   0     826     200                                                         890   -1.03    0.00  1.0000
  -6 -14   0     121     130                                                         290   -5.68    0.00  1.0000
  -6 -14   0      36     100                                                         -20   -5.68    0.00  1.0000
 -14   6   0       9     230                                                          80   -5.70    0.00  1.0000
  -6 -14   0       6     150                                                          70   -5.68    0.00  1.0000
 -14   6   0      34     190                                                         140   -5.70    0.00  1.0000
  14  -6   0      37     110                                                         -50   -5.70    0.00  1.0000
  14  -6   0      89     160                                                         240   -5.70    0.00  1.0000
 -14   6   0      24     160                                                         120   -5.70    0.00  1.0000
  14  -6   0     318     200                                                         570   -5.70    0.00  1.0000
  -6 -14   0      29     170                                                         130   -5.68    0.00  1.0000
 -14   6   0     188     240                                                         390   -5.70    0.00  1.0000
  -6 -14   0      96     130                                                         250   -5.68    0.00  1.0000
 -14   6   0     108     130                                                         270   -5.70    0.00  1.0000
  14  -6   0      37     110                                                         -20   -5.70    0.00  1.0000
   6  14   0     102     150                                                         260   -5.68    0.00  1.0000
  -6 -14   0     154     130                                                         340   -5.68    0.00  1.0000
   6  14   0     154     150                                                         340   -5.68    0.00  1.0000
 -14   6   0      37     170                                                         -10   -5.70    0.00  1.0000
  14  -6   0       3     190                                                          60   -5.70    0.00  1.0000
  14  -6   0     266     230                                                         500   -5.70    0.00  1.0000
  -6 -14   0     115     130                                                         280   -5.68    0.00  1.0000
   6  14   0     161     150                                                         350   -5.68    0.00  1.0000
  -6 -14   0      36     120                                                         -90   -5.68    0.00  1.0000
 -14   6   0     134     150                                                         310   -5.70    0.00  1.0000
  14  -6   0      37     210                                                        -100   -5.70    0.00  1.0000
 -14   6   0      37     150                                                        -230   -5.70    0.00  1.0000
  -6 -14   0     108     110                                                         270   -5.68    0.00  1.0000
   6  14   0      72     130                                                         210   -5.68    0.00  1.0000
  14  -8   0     293     160                                                         290    0.09    0.00  1.0000
 -14   8   0     575     280                                                         570    0.09    0.00  1.0000
 -14   8   0      72     200                                                          70    0.09    0.00  1.0000
  -8 -14   0     414     130                                                         410    0.09    0.00  1.0000
 -14   8   0     414     230                                                         410    0.09    0.00  1.0000
  14  -8   0     524     250                                                         520    0.09    0.00  1.0000
 -14   8   0     344     180                                                         340    0.09    0.00  1.0000
   8  14   0     162     130                                                         160    0.09    0.00  1.0000
  14  -8   0     805     240                                                         800    0.09    0.00  1.0000
  -8 -14   0     474     190                                                         470    0.09    0.00  1.0000
   8  14   0     595     160                                                         590    0.09    0.00  1.0000
   8  14   0     384     140                                                         380    0.09    0.00  1.0000
  14  -8   0     323     240                                                         320    0.09    0.00  1.0000
  14  -8   0     715     280                                                         710    0.09    0.00  1.0000
   8  14   0     504     130                                                         500    0.09    0.00  1.0000
 -14   8   0    1106     330                                                        1100    0.09    0.00  1.0000
   8  14   0     132     140                                                         130    0.09    0.00  1.0000
  -8 -14   0     293     120                                                         290    0.09    0.00  1.0000
 -14   8   0     152     150                                                         150    0.09    0.00  1.0000
  14  -8   0     444     150                                                         440    0.09    0.00  1.0000
  14  -8   0      31     180                                                          30    0.09    0.00  1.0000
  -8 -14   0     193     130                                                         190    0.09    0.00  1.0000
 -14   8   0     595     220                                                         590    0.09    0.00  1.0000
  -8 -14   0     303     110                                                         300    0.09    0.00  1.0000
 -10 -14   0   34267    1290                                                       32447    4.70    0.00  1.0000
 -10 -14   0   33826    1350                                                       32017    4.70    0.00  1.0000
  14 -10   0   32630    1370                                                       30857    4.69    0.00  1.0000
 -14  10   0   33832    1450                                                       32027    4.69    0.00  1.0000
  14 -10   0   32722    1490                                                       30947    4.69    0.00  1.0000
 -14  10   0   34007    1520                                                       32197    4.69    0.00  1.0000
 -14  10   0   32187    1440                                                       30427    4.69    0.00  1.0000
  14 -10   0   31076    1350                                                       29347    4.69    0.00  1.0000
  10  14   0   32458    1330                                                       30687    4.70    0.00  1.0000
 -10 -14   0   32047    1250                                                       30287    4.70    0.00  1.0000
  14 -10   0   34120    1510                                                       32307    4.69    0.00  1.0000
  14 -10   0   32537    1430                                                       30767    4.69    0.00  1.0000
 -14  10   0   32794    1600                                                       31017    4.69    0.00  1.0000
 -14  10   0   33832    1400                                                       32027    4.69    0.00  1.0000
 -10 -14   0   33116    1460                                                       31327    4.70    0.00  1.0000
  14 -10   0   32979    1440                                                       31197    4.69    0.00  1.0000
 -10 -14   0   32026    1270                                                       30267    4.70    0.00  1.0000
  10  14   0   33630    1260                                                       31827    4.70    0.00  1.0000
 -14  10   0   34768    1380                                                       32937    4.69    0.00  1.0000
 -14  10   0   34264    1370                                                       32447    4.69    0.00  1.0000
  14 -10   0   33524    1500                                                       31727    4.69    0.00  1.0000
  10  14   0   31460    1280                                                       29717    4.70    0.00  1.0000
 -10 -14   0   32983    1250                                                       31197    4.70    0.00  1.0000
 -12 -14   0     943     140                                                         930    0.21    0.00  1.0000
  14 -12   0     591     270                                                         580    0.22    0.00  1.0000
 -12 -14   0     933     130                                                         920    0.21    0.00  1.0000
  14 -12   0    1317     230                                                        1300    0.22    0.00  1.0000
 -12 -14   0     994     120                                                         980    0.21    0.00  1.0000
 -14  12   0    1025     210                                                        1010    0.22    0.00  1.0000
  12  14   0     994     140                                                         980    0.21    0.00  1.0000
  14 -12   0     833     340                                                         820    0.22    0.00  1.0000
 -14  12   0    1186     300                                                        1170    0.22    0.00  1.0000
 -14  12   0    1065     410                                                        1050    0.22    0.00  1.0000
  14 -12   0    1628     360                                                        1610    0.22    0.00  1.0000
 -12 -14   0     762     190                                                         750    0.21    0.00  1.0000
  12  14   0     933     140                                                         920    0.21    0.00  1.0000
 -12 -14   0    1205     250                                                        1190    0.21    0.00  1.0000
 -14  12   0    1075     250                                                        1060    0.22    0.00  1.0000
 -14  12   0    1105     290                                                        1090    0.22    0.00  1.0000
 -14  12   0     894     220                                                         880    0.22    0.00  1.0000
 -12 -14   0    1235     220                                                        1220    0.21    0.00  1.0000
 -12 -14   0    1276     180                                                        1260    0.21    0.00  1.0000
 -14  12   0    1045     370                                                        1030    0.22    0.00  1.0000
  12  14   0     964     170                                                         950    0.21    0.00  1.0000
  14 -12   0     510     250                                                         500    0.22    0.00  1.0000
  14 -12   0     793     320                                                         780    0.22    0.00  1.0000
  14 -14   0    7152     690                                                        7739   -3.23    0.00  1.0000
 -14 -14   0    7035     490                                                        7619   -3.24    0.00  1.0000
 -14 -14   0    7410     430                                                        8009   -3.24    0.00  1.0000
  14 -14   0    4292     520                                                        4750   -3.23    0.00  1.0000
 -14 -14   0    6267     410                                                        6819   -3.24    0.00  1.0000
 -14  14   0    6278     730                                                        6829   -3.23    0.00  1.0000
  14 -14   0    5809     620                                                        6339   -3.23    0.00  1.0000
  14  14   0    5272     340                                                        5779   -3.24    0.00  1.0000
 -14  14   0    6096     570                                                        6639   -3.23    0.00  1.0000
 -14  14   0    6115     540                                                        6659   -3.23    0.00  1.0000
  14  14   0    5367     350                                                        5879   -3.24    0.00  1.0000
 -14 -14   0    5970     330                                                        6509   -3.24    0.00  1.0000
 -14 -14   0    5960     330                                                        6499   -3.24    0.00  1.0000
 -14 -14   0    5884     340                                                        6419   -3.24    0.00  1.0000
 -14 -14   0    6238     380                                                        6789   -3.24    0.00  1.0000
  14 -14   0    6029     680                                                        6569   -3.23    0.00  1.0000
 -14  14   0    5713     680                                                        6239   -3.23    0.00  1.0000
  14 -14   0    7190     700                                                        7779   -3.23    0.00  1.0000
  14  14   0    5759     330                                                        6289   -3.24    0.00  1.0000
  14  14   0    5138     430                                                        5639   -3.24    0.00  1.0000
 -15 -13   0    4457     230                                                        4180   -1.99    0.00  1.0000
  15  13   0    4468     250                                                        4190   -1.99    0.00  1.0000
 -15 -13   0    4065     270                                                        3800   -1.99    0.00  1.0000
 -13  15   0    4043     550                                                        3780    1.98    0.00  1.0000
  13 -15   0    4724     550                                                        4440    1.98    0.00  1.0000
 -15 -13   0    4230     300                                                        3960   -1.99    0.00  1.0000
 -13  15   0    4797     450                                                        4510    1.98    0.00  1.0000
 -13  15   0    5085     480                                                        4790    1.98    0.00  1.0000
  13 -15   0    4466     530                                                        4190    1.98    0.00  1.0000
 -15 -13   0    4116     240                                                        3850   -1.99    0.00  1.0000
 -13  15   0    4053     400                                                        3790    1.98    0.00  1.0000
  13 -15   0    4063     530                                                        3800    1.98    0.00  1.0000
  15  13   0    3909     240                                                        3650   -1.99    0.00  1.0000
 -15 -13   0    4199     290                                                        3930   -1.99    0.00  1.0000
 -13  15   0    3991     590                                                        3730    1.98    0.00  1.0000
  15  13   0    3951     240                                                        3690   -1.99    0.00  1.0000
 -15 -13   0    4509     360                                                        4230   -1.99    0.00  1.0000
  13 -15   0    3432     510                                                        3190    1.98    0.00  1.0000
 -15 -13   0    4519     230                                                        4240   -1.99    0.00  1.0000
  13 -15   0    5373     510                                                        5069    1.98    0.00  1.0000
  11 -15   0    4280     510                                                        4560    1.99    0.00  1.0000
 -15 -11   0    5901     320                                                        6229   -1.99    0.00  1.0000
 -11  15   0    6408     740                                                        6749    1.99    0.00  1.0000
 -11  15   0    5901     630                                                        6229    1.99    0.00  1.0000
 -15 -11   0    6281     360                                                        6619   -1.99    0.00  1.0000
 -15 -11   0    5619     380                                                        5939   -1.99    0.00  1.0000
 -11  15   0    6320     500                                                        6659    1.99    0.00  1.0000
  11 -15   0    4639     450                                                        4930    1.99    0.00  1.0000
  11 -15   0    5007     560                                                        5309    1.99    0.00  1.0000
  15  11   0    5084     270                                                        5389   -1.99    0.00  1.0000
  11 -15   0    6320     660                                                        6659    1.99    0.00  1.0000
 -11  15   0    5726     510                                                        6049    1.99    0.00  1.0000
 -15 -11   0    5648     320                                                        5969   -1.99    0.00  1.0000
  11 -15   0    5464     630                                                        5779    1.99    0.00  1.0000
 -15 -11   0    5026     270                                                        5329   -1.99    0.00  1.0000
  11 -15   0    4116     490                                                        4390    1.99    0.00  1.0000
  15  11   0    5502     280                                                        5819   -1.99    0.00  1.0000
 -15 -11   0    5629     280                                                        5949   -1.99    0.00  1.0000
  15  11   0    5405     280                                                        5719   -1.99    0.00  1.0000
 -11  15   0    5085     470                                                        5389    1.99    0.00  1.0000
 -15 -11   0    5561     280                                                        5879   -1.99    0.00  1.0000
  15  11   0    5570     310                                                        5889   -1.99    0.00  1.0000
 -15  -9   0   21893     950                                                       22838    2.98    0.00  1.0000
  15   9   0   22324     950                                                       23278    2.98    0.00  1.0000
   9 -15   0   24154    1260                                                       25147   -2.98    0.00  1.0000
  -9  15   0   26086    1400                                                       27117   -2.98    0.00  1.0000
   9 -15   0   23891    1270                                                       24878   -2.98    0.00  1.0000
  -9  15   0   27999    1340                                                       29067   -2.98    0.00  1.0000
  15   9   0   23137    1000                                                       24108    2.98    0.00  1.0000
   9 -15   0   25478    1260                                                       26497   -2.98    0.00  1.0000
 -15  -9   0   26597    1070                                                       27637    2.98    0.00  1.0000
 -15  -9   0   24224     990                                                       25217    2.98    0.00  1.0000
   9 -15   0   24595    1220                                                       25597   -2.98    0.00  1.0000
   9 -15   0   25978    1240                                                       27007   -2.98    0.00  1.0000
  15   9   0   21933     980                                                       22878    2.98    0.00  1.0000
  -9  15   0   22646    1130                                                       23608   -2.98    0.00  1.0000
  -9  15   0   23038    1140                                                       24008   -2.98    0.00  1.0000
 -15  -9   0   23274     970                                                       24248    2.98    0.00  1.0000
   9 -15   0   22196    1140                                                       23148   -2.98    0.00  1.0000
 -15  -9   0   23941     990                                                       24928    2.98    0.00  1.0000
   9 -15   0   23655    1100                                                       24638   -2.98    0.00  1.0000
  15   9   0   23206     960                                                       24178    2.98    0.00  1.0000
 -15  -9   0   21991     950                                                       22938    2.98    0.00  1.0000
   9 -15   0   26076    1330                                                       27107   -2.98    0.00  1.0000
 -15  -7   0    1653     170                                                        1790    1.57    0.00  1.0000
  15   7   0    1663     150                                                        1800    1.57    0.00  1.0000
  -7  15   0    1251     230                                                        1370   -1.56    0.00  1.0000
  -7  15   0    1156     220                                                        1270   -1.56    0.00  1.0000
  -7  15   0    1242     230                                                        1360   -1.56    0.00  1.0000
   7 -15   0    1635     350                                                        1770   -1.56    0.00  1.0000
   7 -15   0    1203     310                                                        1320   -1.56    0.00  1.0000
  15   7   0    1605     170                                                        1740    1.57    0.00  1.0000
 -15  -7   0    1347     120                                                        1470    1.57    0.00  1.0000
   7 -15   0    1318     310                                                        1440   -1.56    0.00  1.0000
   7 -15   0    1587     230                                                        1720   -1.56    0.00  1.0000
 -15  -7   0    1270     220                                                        1390    1.57    0.00  1.0000
 -15  -7   0    1155     130                                                        1270    1.57    0.00  1.0000
 -15  -7   0    1280     130                                                        1400    1.57    0.00  1.0000
  15   7   0    1375     180                                                        1500    1.57    0.00  1.0000
   7 -15   0    1529     300                                                        1660   -1.56    0.00  1.0000
   7 -15   0    1539     310                                                        1670   -1.56    0.00  1.0000
   7 -15   0    1702     270                                                        1840   -1.56    0.00  1.0000
   7 -15   0    1318     340                                                        1440   -1.56    0.00  1.0000
 -15  -7   0    1567     160                                                        1700    1.57    0.00  1.0000
  -7  15   0    1529     440                                                        1660   -1.56    0.00  1.0000
  -7  15   0    1625     350                                                        1760   -1.56    0.00  1.0000
   5 -15   0    3858     450                                                        3920   -0.47    0.00  1.0000
  -5  15   0    3114     320                                                        3170   -0.47    0.00  1.0000
   5 -15   0    3729     400                                                        3790   -0.47    0.00  1.0000
   5 -15   0    2797     410                                                        2850   -0.47    0.00  1.0000
  -5  15   0    3432     310                                                        3490   -0.47    0.00  1.0000
 -15  -5   0    3173     330                                                        3230    0.47    0.00  1.0000
   5 -15   0    3402     380                                                        3460   -0.47    0.00  1.0000
 -15  -5   0    3630     240                                                        3690    0.47    0.00  1.0000
  15   5   0    3411     260                                                        3470    0.47    0.00  1.0000
  -5  15   0    2659     440                                                        2710   -0.47    0.00  1.0000
 -15  -5   0    3560     210                                                        3620    0.47    0.00  1.0000
   5 -15   0    3114     330                                                        3170   -0.47    0.00  1.0000
   5 -15   0    3650     370                                                        3710   -0.47    0.00  1.0000
  15   5   0    3858     290                                                        3920    0.47    0.00  1.0000
  -5  15   0    4206     360                                                        4270   -0.47    0.00  1.0000
  -5  15   0    3660     440                                                        3720   -0.47    0.00  1.0000
   5 -15   0    2292     340                                                        2340   -0.47    0.00  1.0000
   5 -15   0    3303     340                                                        3360   -0.47    0.00  1.0000
   5 -15   0    3124     380                                                        3180   -0.47    0.00  1.0000
 -15  -5   0    3411     250                                                        3470    0.47    0.00  1.0000
[truncated: 42,463,737 more chars]
